# Supplementary material for: Microbial Risk Assessment Across Diverse Environments Based on Metagenomic Absolute Quantification with Cellular Internal Standard
Source: Research Square preprint supplement (doi:10.21203/rs.3.rs-5150537/v1), 2024-10-16
Supplement: Supplementary file 1 [file d787c324cba09821b9a545fc.xlsx]

## Sheet: S2.1
Plate Counting	Allo (G+) counting result(CFU/mL)	Imte (G-) counting result(CFU/mL)
	3000000000	13000000000
	2100000000	9300000000
	2200000000	9300000000
	2700000000	8600000000
	2260000000	6020000000
	2870000000	6760000000
	2630000000	6780000000
Geometrical Mean	2.51608e+09	8.27991e+09
Flow cytometry	Allo (G+) counting result(CFU/mL)	Imte (G-) counting result(CFU/mL)
	1669355000	6274810000
	1822700000	7.51364e+09
Geometrical Mean	1.74434e+09	6.86634e+09
Difference between two counting method (%)	30.6722	17.0723

## Sheet: S2.2A
1.Based on base number
Pure Culture	Mapping G- bacteria percent(%)	Mapping G+ bacteria percent(%)	Total mapping to G+ and G- bacteria(%)
G+ bacteria_1	0.01	97.26	97.27
G+ bacteria_2	0.03	97.08	97.11
G- bacteria_1	97.15	0.07	97.22
G- bacteria_2	97.22	0.05	97.27
2.Based on total base number of matched reads
Pure Culture	Unique mapping G- bacteria percent(%)	Unique mapping G+ bacteria percent(%)	Mapping both G-/G+ percent(%)	Mapping neither G- nor G+ bacteria percent(%)
G+ bacteria_1	0	99.81	0.01	0.18
G+ bacteria_2	0.03	99.68	0.01	0.28
G- bacteria_1	99.71	0.07	0.01	0.21
G- bacteria_2	99.7	0.03	0.03	0.24
3.Based on reads number
Pure Culture	Mapping G- bacteria percent(%)	Mapping G+ bacteria percent(%)	Unique mapping G- bacteria percent(%)	Unique mapping G+ bacteria percent(%)	Mapping both G-/G+ percent(%)
G+ bacteria_1	0.03	99.2	0.01	99.2	0.01
G+ bacteria_2	0.02	98.9	0.02	98.9	0
G- bacteria_1	99.05	0.08	99.05	0.07	0
G- bacteria_2	98.97	0.03	98.96	0.02	0

## Sheet: S2.2B
1.Based on base number
	Mapping G- bacteria percent(%)	Genome number of G-	Mapping G+ bacteria percent(%)	Genome number of G+	Total mapping to G- and G+ percent(%)	Genome number ratio G+: G-	Theoretical Genome number ratio G+: G-	Percentage difference between actual value and theoretical value
mix_1(G+:G- volume ratio = 4:1)	38.5906	14.5228	58.5307	25.3956	97.1213	1.74867	1.22	0.302325
mix_2(G+:G- volume ratio = 4:1)	40.31	16.625	56.97	27.0851	97.28	1.62917	1.22	0.251153
mix_3(G+:G- volume ratio = 1:1)	73.7888	37.0934	23.5023	13.6214	97.2911	0.367219	0.3	0.183048
mix_4(G+:G- volume ratio= 1:1)	76.1324	34.3157	21.1043	10.9673	97.2368	0.3196	0.3	0.0613265
2.Based on total base number of matched reads
	Mapping G- bacteria percent(%)	Genome number of G-	Mapping G+ bacteria percent(%)	Genome number of G+	Mapping both G-/G+ percent(%)	Mapping neither G- nor G+ percent(%)	Genome ratio (G+/G-)	Theoretical Genome number ratio G+: G-	Percentage difference between actual value and theoretical value
mix_1(G+:G- = 4:1)	39.5595	14.8874	60.0517	26.0555	0.0713662	0.317518	1.75017	1.22	0.302924
mix_2(G+:G- = 4:1)	41.2908	17.0281	58.4368	27.7845	0.0519709	0.22	1.63169	1.22	0.252309
mix_3(G+:G- = 1:1)	75.69	38.05	24..12	13.98	0.02	0.17	0.367411	0.3	0.183476
mix_4(G+:G- = 1:1)	78.0676	35.1879	21.6478	11.2497	0.0336137	0.25	0.319693	0.3	0.0616
3.Based on reads number
	Mapping G- bacteria percent(%)	Mapping G+ bacteria percent(%)	Unique mapping G- bacteria percent(%)	Unique mapping G+ bacteria percent(%)	Mapping both G-/G+ percent(%)	Genome ratio(G+/G-)	Theoretical Genome number ratio G+: G-	Percentage difference between actual value and theoretical value
mix_1(G+:G- = 4:1)	39.6875	59.2132	39.6614	59.1871	0.0260952	1.49231	1.22	0.182476
mix_2(G+:G- = 4:1)	41.284	57.7712	41.262	57.7492	0.0219732	1.39957	1.22	0.128306
mix_3(G+:G- = 1:1)	75.27	23.88	75.26	23.86	0.01	0.317034	0.3	0.0537301
mix_4(G+:G- = 1:1)	77.4838	21.4686	77.4606	21.4454	0.0232057	0.276917	0.3	-0.0833566

## Sheet: S2.3
G+ Phylum	G- Phylum	G+/G- Phylum
Actinobacteriota	Aquificota	4484_113
Atribacterota	Acidobacteriota	4572_55
Deinococcota	Armatimonadota	AABM5_125_24
Firmicutes	Bacteroidota	Aenigmatarchaeota
Firmicutes_A	Bdellovibrionota	Abyssubacteria
Firmicutes_B	Bdellovibrionota_C	Aerophobota
Firmicutes_C	Bdellovibrionota_E	Altiarchaeota
Firmicutes_D	Campylobacterota	ARS69
Firmicutes_E	Chlamydiota	Asgardarchaeota
Firmicutes_F	Chloroflexota	Aureabacteria
Firmicutes_G	Cyanobacteria	B130_G9
Firmicutes_H	Deferribacterota	B1Sed10_29
	Dictyoglomota	Bipolaricaulota
	Edwardsbacteria	BMS3Abin14
	Elusimicrobiota	BS750m_G25
	Fusobacteriota	BS750m_G34
	Methylomirabilota	CAIJMQ01
	Myxococcota	Caldisericota
	Myxococcota_A	Calditrichota
	Nitrospinota	Calescibacterota
	Nitrospinota_B	CG03
	Nitrospirota	CG2_30_53_67
	Nitrospirota_A	CG2_30_70_394
	Planctomycetota	Chrysiogenota
	Poribacteria	CLD3
	Proteobacteria	Cloacimonadota
	Spirochaetota	Coprothermobacterota
	Synergistota	CSP1_3
	Thermodesulfobiota	CSSED10_310
	Thermotogota	Delongbacteria
	Verrucomicrobiota	Dependentiae
		Desantisbacteria
		Desulfobacterota
		Desulfobacterota_B
		Desulfobacterota_C
		Desulfobacterota_D
		Desulfobacterota_E
		Desulfobacterota_G
		Desulfobacterota_I
		Dormibacterota
		DRYD01
		DTU030
		DUMJ01
		Eisenbacteria
		Eremiobacterota
		EX4484_52
		FCPU426
		FEN_1099
		Fermentibacterota
		Fibrobacterota
		Firestonebacteria
		GCA_001730085
		Gemmatimonadota
		Gemmatimonadota_A
		Goldbacteria
		Hadarchaeota
		Halobacteriota
		HKB111
		Huberarchaeota
		Hydrogenedentota
		Hydrothermarchaeota
		Iainarchaeota
		J088
		JAAXHH01
		JABDJQ01
		JABMQX01
		JACIXR01
		JACPQY01
		JACPSX01
		JACPUC01
		JACPWU01
		JACQOV01
		JACRDZ01
		JADJOY01
		JAFGBW01
		JAFGND01
		JAFGOL01
		JAGOBX01
		JAGOEH01
		JAHJDO01
		JdFR_76
		Krumholzibacteriota
		KSB1
		Latescibacterota
		Lindowbacteria
		Margulisbacteria
		Marinisomatota
		Mcinerneyibacteriota
		Methanobacteriota
		Methanobacteriota_A
		Methanobacteriota_B
		Micrarchaeota
		Moduliflexota
		Muirbacteria
		Nanoarchaeota
		Nanohaloarchaeota
		NPL_UPA2
		OLB16
		Omnitrophota
		Patescibacteria
		PUNC01
		QNDG01
		Ratteibacteria
		RBG_13_61_14
		RBG_13_66_14
		Riflebacteria
		RUG730
		SAR324
		Schekmanbacteria
		SLNR01
		SM23_31
		SpSt_1190
		SpSt_318
		Sumerlaeota
		SZUA_182
		SZUA_79
		T1Sed10_126
		T1SED10_198M
		TA06
		TA06_A
		Tectomicrobia
		Thermoplasmatota
		Thermoproteota
		Thermosulfidibacterota
		UBA10199
		UBA1439
		UBA2233
		UBA3054
		UBA6262
		UBA6266
		UBA8248
		UBA8481
		UBA9089
		UBP13
		UBP14
		UBP15
		UBP17
		UBP18
		UBP4
		UBP6
		UBP7
		Undinarchaeota
		VGIX01
		Wallbacteria
		WOR_3
		Zixibacteria

## Sheet: S2.4
		Theoretical					Replicate 1				Replicate 2				Replicate 3
		Info provided by manufacturer	Adjustment after removing yeasts				Abundance				Abundance				Abundance
	Gram Stain	Genome copy (%)	Adjusted genome copy (%)**	Mean (cells/mL)	Upper end (cells/mL)	Lower end (cells/mL)	Absolute Abundance (cells/mL)	Based on AQ result before G+/G- Correction	Based on AQ result after G+/G- Correction	Difference compared to the lower/higher end (%)***	Absolute Abundance (cells/mL)	Based on AQ result before G+/G- Correction	Based on AQ result after G+/G- Correction	Difference compared to the lower/higher end (%)***	Absolute Abundance (cells/mL)	Based on AQ result before G+/G- Correction	Based on AQ result after G+/G- Correction	Difference compared to the lower/higher end (%)***
Akkermansia muciniphila	-	1.62	1.63014	6.40218e+07	7.36251e+07	5.44186e+07	6.55327e+07	1.6993	1.82498	0	5.54525e+07	1.61937	1.69105	0	6.37638e+07	1.57749	1.71738	0
Bacteroides fragilis	-	8.33	8.38212	3.29199e+08	3.78579e+08	2.79819e+08	3.78455e+08	9.81354	10.5394	0	3.33678e+08	9.74437	10.1757	0	3.95869e+08	9.79368	10.6621	4.56729
Bifidobacterium adolescentis	-	8.83	8.88525	3.48959e+08	4.01302e+08	2.96615e+08	2.9317e+08	7.60206	8.16433	1.16125	2.6502e+08	7.73935	8.08192	10.6518	3.17422e+08	7.85293	8.54928	0
Clostridioides difficile	+	1.1	1.10688	4.34716e+07	4.99924e+07	3.69509e+07	4.05216e+07	1.28653	1.12846	0	4.19335e+07	1.38459	1.27878	0	4.23082e+07	1.34515	1.13951	0
Clostridium_P perfringens	+	9e-05	9.05631e-05	3556.77	4090.28	3023.25	23133.3	0.000734462	0.000644225	465.566	10391.6	0.000343117	0.000316896	154.055	7773.4	0.000247148	0.000209364	90.0454
Enterococcus faecalis	+	0.0011	0.00110688	43471.6	49992.4	36950.9	44553.2	0.00141453	0.00124074	0	39271.5	0.0012967	0.0011976	0	25934.6	0.000824567	0.000698508	29.8133
Escherichia coli	-	8.71	8.7645	3.44216e+08	3.95849e+08	2.92584e+08	2.0057e+08	5.20089	5.58557	31.4486	1.70338e+08	4.97436	5.19454	41.7815	2.05069e+08	5.07334	5.52322	29.911
Faecalibacterium prausnitzii	+	14.77	14.8624	5.83705e+08	6.71261e+08	4.9615e+08	5.56716e+08	17.6753	15.5037	0	4.99833e+08	16.5039	15.2427	0	5.2357e+08	16.6464	14.1016	0
Fusobacterium nucleatum	-	7.53	7.57712	2.97583e+08	3.4222e+08	2.52946e+08	2.8964e+08	7.51051	8.06601	0	2.87524e+08	8.39653	8.76818	0	3.31949e+08	8.21231	8.94053	0
Limosilactobacillus fermentum	+	9.68	9.74057	3.8255e+08	4.39933e+08	3.25168e+08	4.2789e+08	13.5852	11.9161	0	4.06299e+08	13.4155	12.3903	0	4.21945e+08	13.4154	11.3644	0
Prevotella corporis	-	6.26	6.29917	2.47393e+08	2.84502e+08	2.10284e+08	2.76782e+08	7.17711	7.70795	0	2.42512e+08	7.08204	7.39551	0	2.84951e+08	7.04961	7.67473	0
Roseburia hominis	+/-	12.43	12.5078	4.91229e+08	5.64914e+08	4.17545e+08	3.36386e+08	9.6026	9.36782	19.4372	3.31307e+08	10.2685	10.1034	20.6536	362576484	10.0893	9.76544	13.1647
Salmonella enterica	-	0.007	0.0070438	276638	318133	235142	434525	0.0112675	0.0121008	36.5857	404575	0.0118148	0.0123377	27.1716	512583	0.0126811	0.0138056	61.1221
Veillonella rogosae	-	19.94	20.0648	7.88022e+08	9.06225e+08	6.69819e+08	7.17533e+08	18.606	19.9822	0	6.37635e+08	18.6208	19.445	4.80477	7.5479e+08	18.6733	20.3291	0
Methanobrevibacter_A smithii	+	0.17	0.171064	6.71834e+06	7.72609e+06	5.71059e+06	7.16785e+06	0.227574	0.199613	0	7.18651e+06	0.23729	0.219156	0	8.09369e+06	0.257332	0.217991	4.7579
AQ (cells/mL)							3.59087e+09				3.27917e+09				3.71286e+09
R between RQ provided and Calculated								0.954306	0.969759			0.960874	0.969445			0.961015	0.971494
R2 between RQ provided and Calculated								0.910701	0.940432			0.923278	0.939824			0.923549	0.9438

## Sheet: S2.5
	G+ spike-in coverage	G- spike-in coverage	Total classified microorganism coverage	G+ spike-in ratio	G- spike-in ratio	G+/G- Ratio
ST_Eff_PowerSoil_1（250mL）	25.5765	15.8651	1477.55	1.73101	1.07375	1.61212
ST_Eff_PowerSoil_2（250mL）	24.6881	13.2306	1485.22	1.66225	0.890817	1.86598
ST_Eff_PowerSoil_3（250mL）	30.5772	15.0768	1867.15	1.63764	0.807478	2.0281
ST_Eff_PowerWater_1（250mL）	27.5156	9.44339	1544.55	1.78146	0.6114	2.91374
ST_Eff_PowerWater_2（250mL）	27.9678	8.14142	1382.31	2.02326	0.588972	3.43525
ST_Eff_PowerWater_3（250mL）	27.409	9.72848	1462.59	1.874	0.665153	2.8174

## Sheet: S2.6
Effluent
	Total Base	Map Imte Base	Ratio(%)	Map Allo Base	Ratio(%)		Total Reads	Map Imte Reads	Ratio(%)	Map Allo Reads	Ratio(%)
W_Ef_10_05	10671110700	2910701	0.0136382	2791186	0.0261565		71140738	30728	0.0431933	27288	0.0383578
W_Ef_1_08	10842024000	1221937	0.0112704	2677765	0.024698		72280160	13622	0.0188461	23379	0.032345
W_Ef_3_08	10531520700	2729215	0.0259147	4638147	0.0440406		70210138	27958	0.0398205	41643	0.0593119
W_Ef_2_08	10059920700	5168558	0.0513777	7562734	0.0751769		67066138	52071	0.0776413	63425	0.0945708
W_Ef_4_05	18484521000	4719252	0.0255308	6487949	0.0350994		123230140	48082	0.0390181	60176	0.0488322
W_Ef_5_08	19531991100	3411613	0.0174668	4873235	0.02495		130213274	35077	0.0269381	44532	0.0341993
W_Ef_6_05	10404734100	3975602	0.0382095	8245251	0.0792452		69364894	42211	0.0608535	66799	0.0963009
W_Ef_7_05	10687402200	2124161	0.0198754	2636713	0.0246712		71249348	21018	0.0294992	23596	0.0331175
W_Ef_8_05	10763488800	5902754	0.0548405	8213093	0.0763051		71756592	61945	0.0863266	65778	0.0916682
W_Ef_11_05	2634642000	519947	0.019735	642113	0.0243719		17564280	5391	0.030693	5859	0.0333575
W_Ef_12_05	10021172700	2354207	0.0234923	3406392	0.0339919		66807818	22225	0.0332671	28525	0.0426971
W_Ef_13_05	10495972500	2891157	0.0275454	3116654	0.0296938		69973150	28315	0.0404655	28258	0.0403841
W_Ef_14_05	10278366600	1336380	0.0130019	3170483	0.0308462		68522444	15108	0.0220483	30694	0.0447941
W_Ef_9_05	10777483200	1833733	0.0170145	2394598	0.0222185		71849888	20125	0.0280098	21786	0.0303216
MAX			0.0548405		0.0792452				0.0863266		0.0963009
MIN			0.0112704		0.0222185				0.0188461		0.0303216
AVERAGE			0.0256367		0.0393904				0.0411872		0.051447
Influent
	Total Base	Map Imte Base	Ratio(%)	Map Allo Base	Ratio(%)		Total Reads	Map Imte Reads	Ratio(%)	Map Allo Reads	Ratio(%)
W_In_1_05	10311459900	4300394	0.041705	3935509	0.0381664		68743066	37349	0.0543313	36235	0.0527108
W_In_2_08	10464649500	9554843	0.0913059	9038946	0.086376		69764330	90719	0.130036	84265	0.120785
W_In_3_05	10239406500	6601114	0.0644677	6173749	0.060294		68262710	58192	0.0852471	55742	0.0816581
W_In_4_05	13282348800	9260699	0.0697218	8029527	0.0604526		88548992	79452	0.0897266	72998	0.082438
W_In_5_05	14866134300	11814425	0.0794721	8904874	0.0599004		99107562	98952	0.099843	80155	0.0808768
W_In_6_05	10659288300	6668463	0.0625601	6302337	0.0591253		71061922	58546	0.0823873	56053	0.0788791
W_In_7_05	10416555900	4373230	0.0419835	3386542	0.0325111		69443706	37672	0.0542483	31062	0.0447298
W_In_10_05	10072556700	8237139	0.081778	6068825	0.0602511		67150378	69134	0.102954	55123	0.0820889
W_In_11_05	10776895800	5631094	0.0522515	5259986	0.048808		71845972	51126	0.0711606	46976	0.0653843
W_In_12_05	10673272200	10513788	0.0985058	8923028	0.0836016		71155148	91864	0.129104	82058	0.115323
W_In_13_05	10425946200	4145063	0.0397572	5435922	0.0521384		69506308	39981	0.0575214	47593	0.0684729
W_In_14_05	10445453400	6780316	0.0649116	7264843	0.0695503		69636356	61621	0.0884897	64266	0.092288
MAX			0.0985058		0.086376				0.130036		0.120785
MIN			0.0397572		0.0325111				0.0542483		0.0447298
AVERAGE			0.0657017		0.0592646				0.0870875		0.0804695
Marine Water
	Total Base	Map Imte Base	Ratio(%)	Map Allo Base	Ratio(%)		Total Reads	Map Imte Reads	Ratio(%)	Map Allo Reads	Ratio(%)
MW_3_2105	10901646600	3665631	0.0336246	2651878	0.0243255		72677644	32836	0.0451803	23881	0.0328588
MW_18_2105	12341388600	2702713	0.0218996	2688749	0.0217864		82275924	24698	0.0300185	24211	0.0294266
MW_20_2105	13625340600	9518854	0.0698614	5772460	0.0423656		90835604	79563	0.0875901	52224	0.0574929
MW_26_2105	5788002600	2111024	0.0364724	2280397	0.0393987		38586684	19927	0.0516422	19870	0.0514944
MW_4_2105	11603800200	4104336	0.0353706	3296284	0.0284069		77358668	35851	0.0463439	28671	0.0370624
MW_5_2105	11554644600	2792362	0.0241666	2162070	0.0187117		77030964	24501	0.0318067	19306	0.0250626
MW_6_2105	15630143100	5533754	0.0354044	4161688	0.026626		104200954	49491	0.0474957	37468	0.0359574
MW_12_2105	12012745800	3160708	0.0263113	2210021	0.0183973		80084972	28188	0.0351976	19664	0.0245539
MW_15_2105	12033054900	5177709	0.043029	3764382	0.0312837		80220366	45553	0.0567848	34275	0.0427261
MW_16_2105	12210431400	2632783	0.0215618	2441415	0.0199945		81402876	22739	0.0279339	21433	0.0263295
MW_8_2105	11397072300	3021703	0.026513	2297480	0.0201585		75980482	25440	0.0334823	19620	0.0258224
MW_9_2105	11824195500	3206330	0.0271167	2219865	0.0187739		78827970	27356	0.0347034	19194	0.0243492
MW_10_2105	11205466500	3724256	0.0332361	2477664	0.0221112		74703110	31525	0.0422004	21630	0.0289546
MW_11_2105	11978271000	3082362	0.0257329	2119593	0.0176953		79855140	26266	0.0328921	18190	0.0227787
MW_1_2105	10553985300	2960676	0.0280527	2913350	0.0276043		70359902	24649	0.0350327	23792	0.0338147
MW_13_2105	11171461200	4814362	0.0430952	2120517	0.0189816		74476408	37263	0.0500333	18392	0.0246951
MW_14_2105	12528261300	5175256	0.0413087	2494316	0.0199095		83521742	41147	0.049265	21637	0.0259058
MW_17_2105	11015955900	3106980	0.0282044	2739732	0.0248706		73439706	27233	0.0370821	24327	0.0331251
MW_19_2105	12071474100	2973547	0.0246328	2237709	0.0185372		80476494	25341	0.0314887	19662	0.024432
MW_21_2108	6287823000	1582020	0.0251601	988909	0.0157274		41918820	13182	0.0314465	8182	0.0195187
MW_2_2105	14831691900	4301241	0.0290003	4621117	0.031157		98877946	37131	0.0375524	38764	0.0392039
MW_22_2105	10356199500	11253596	0.108665	2685592	0.0259322		69041330	76975	0.111491	22481	0.0325617
MW_25_2105	12537727500	5264044	0.0419856	4313570	0.0344047		83584850	45282	0.0541749	36322	0.0434552
MW_7_2105	11478550200	3081256	0.0268436	2166238	0.0188721		76523668	26483	0.0346076	18657	0.0243807
MW_23_2108	8552057700	2394465	0.0279987	1274861	0.0149071		57013718	19027	0.0333727	10659	0.0186955
MW_24_2108	8762246400	2587257	0.0295273	1233971	0.0140828		58414976	20569	0.0352119	10683	0.0182881
MAX			0.108665		0.0423656				0.111491		0.0574929
MIN			0.0215618		0.0140828				0.0279339		0.0182881
AVERAGE			0.0351837		0.0236547				0.0440012		0.0308825
AS
	Total Base	Map Imte Base	Ratio(%)	Map Allo Base	Ratio(%)		Total Reads	Map Imte Reads	Ratio(%)	Map Allo Reads	Ratio(%)
W_AS_1_08	11485830600	1076968	0.00937649	1969152	0.0171442		76572204	11972	0.0156349	17228	0.022499
W_AS_11_08	10064854200	1291378	0.0128306	1701210	0.0169025		67099028	12914	0.0192462	15269	0.0227559
W_AS_3_05	11771051400	1370464	0.0116427	1953029	0.0165918		78473676	14478	0.0184495	17921	0.022837
W_AS_7_08	13957945500	1892505	0.0135586	2421318	0.0173472		93052970	18359	0.0197296	21324	0.022916
W_AS_2_05	11200928400	7690834	0.0686625	12318866	0.109981		74672856	70505	0.0944185	94277	0.126253
W_AS_6_05	11380020600	6932590	0.060919	7963020	0.0699737		75866804	59573	0.0785231	65666	0.0865543
MAX			0.0686625		0.109981				0.0944185		0.126253
MIN			0.00937649		0.0165918				0.0156349		0.022499
AVERAGE			0.0294983		0.0413234				0.0410003		0.0506359
River Water
	Total Base	Map Imte Base	Ratio(%)	Map Allo Base	Ratio(%)		Total Reads	Map Imte Reads	Ratio(%)	Map Allo Reads	Ratio(%)
RW_10_2105	10756525500	2760290	0.0256615	3691554	0.0343192		71710170	26449	0.0368832	31778	0.0443145
RW_11_2105	11304962100	4376575	0.0387138	4438147	0.0392584		75366414	39098	0.0518772	39687	0.0526587
RW_12_2105	11454373200	1195321	0.0104355	1961142	0.0171213		76362488	13165	0.0172401	16901	0.0221326
RW_13_2105	11264416200	3216530	0.0285548	4022121	0.0357064		75096108	30437	0.0405307	33611	0.0447573
RW_14_2105	11227794600	3156470	0.028113	3260057	0.0290356		74851964	29193	0.039001	29018	0.0387672
RW_1_2108	11077758000	2850894	0.0257353	4634542	0.0418365		73851720	27973	0.0378772	39791	0.0538796
RW_15_2105	13800632100	5114539	0.0370602	5511539	0.0399369		92004214	47311	0.0514226	47612	0.0517498
RW_16_2105	11679243600	2636986	0.0225784	3881108	0.0332308		77861624	26301	0.0337792	33209	0.0426513
RW_17_2108	11586176700	2232317	0.0192671	3266276	0.0281911		77241178	23402	0.0302973	29605	0.038328
RW_2_2105	12107066100	1974527	0.0163089	2534910	0.0209374		80713774	19769	0.0244927	23042	0.0285478
RW_3_2105	11575319400	4281814	0.0369909	7767060	0.0671002		77168796	43188	0.0559656	66536	0.0862214
RW_4_2105	11917563600	1620616	0.0135986	2743446	0.0230202		79450424	16711	0.0210332	23758	0.0299029
RW_5_2108	11677619100	3236635	0.0277166	4753641	0.0407073		77850794	31416	0.0403541	40981	0.0526404
RW_6_2105	10903324800	5158861	0.0473146	6380215	0.0585162		72688832	47251	0.0650045	55708	0.076639
RW_7_2105	10502868900	2788981	0.0265545	3789796	0.0360834		70019126	28165	0.0402247	32442	0.0463331
RW_8_2105	10111967100	9958583	0.0984831	5817202	0.0575279		67413114	83203	0.123423	51040	0.0757123
RW_9_2105	11838508200	2143343	0.0181048	2545582	0.0215026		78923388	21288	0.026973	23299	0.029521
MAX			0.0984831		0.0671002				0.123423		0.0862214
MIN			0.0104355		0.0171213				0.0172401		0.0221326
AVERAGE			0.0306583		0.0367077				0.0433164		0.0479269
Bathing Beach Water
	Total Base	Map Imte Base	Ratio(%)	Map Allo Base	Ratio(%)		Total Reads	Map Imte Reads	Ratio(%)	Map Allo Reads	Ratio(%)
BB_11_2105	4735230000	1739185	0.0367286	1374882	0.0290352		31568200	14855	0.0470568	11760	0.0372527
BB_6_2105	11727159300	5174544	0.0441244	4011610	0.0342079		78181062	43653	0.0558358	35367	0.0452373
BB_2_05	9565477500	2723097	0.028468	2785545	0.0291208		63769850	25945	0.0406854	24896	0.0390404
BB_7_05	8032426800	4486902	0.0558599	2784109	0.0346609		53549512	36185	0.067573	25407	0.0474458
BB_1_2105	10427692800	3294908	0.0315977	4098300	0.0393021		69517952	33556	0.0482695	35707	0.0513637
BB_10_2105	11789180100	3595574	0.0304989	2643044	0.0224192		78594534	30539	0.0388564	22533	0.0286699
BB_14_2108	13699104900	6169379	0.0450349	5025981	0.0366884		91327366	51430	0.0563139	40812	0.0446876
BB_13_2108	11020073100	5730477	0.0520004	3185475	0.0289061		73467154	43938	0.0598063	25363	0.0345229
BB_15_2105	12335204700	4328980	0.0350945	2536360	0.020562		82234698	35195	0.0427982	21989	0.0267393
BB_3_2105	12688124700	4348805	0.0342746	4784092	0.0377053		84587498	39435	0.0466204	38682	0.0457302
BB_4_2108	9836398800	3201732	0.0325498	2993780	0.0304357		65575992	27777	0.0423585	23678	0.0361077
BB_5_2105	11894607000	4178072	0.0351258	2378344	0.0199951		79297380	33952	0.042816	19896	0.0250904
BB_8_05	10983200400	7129862	0.0649161	3607150	0.0328424		73221336	51211	0.06994	30352	0.0414524
BB_9_2105	10009805400	3023755	0.0302079	2305543	0.0230328		66732036	25828	0.038704	19494	0.0292124
MAX			0.0649161		0.0393021				0.06994		0.0513637
MIN			0.028468		0.0199951				0.038704		0.0250904
AVERAGE			0.0397487		0.0299224				0.049831		0.0380395
Fishery Water
	Total Base	Map Imte Base	Ratio(%)	Map Allo Base	Ratio(%)		Total Reads	Map Imte Reads	Ratio(%)	Map Allo Reads	Ratio(%)
FW_1_06	18594079500	4136507	0.0222464	5973746	0.0321271		123960530	36859	0.0297345	51128	0.0412454
FW_2_06	7157823900	1874208	0.026184	1985412	0.0277376		47718826	17369	0.0363986	16816	0.0352398
FW_3_09	10180008300	2071995	0.0203536	1861915	0.0182899		67866722	19457	0.0286694	16878	0.0248693
FW_4_09	10103508300	2247653	0.0222463	1974162	0.0195394		67356722	20289	0.0301217	17434	0.0258831
FW_5_06	7011900600	2422614	0.03455	2112981	0.0301342		46746004	20944	0.0448038	18338	0.039229
FW_6_09	10237261800	2773030	0.0270876	2136826	0.020873		68248412	24389	0.0357356	18773	0.0275069
FW_8_06	15526642200	7884263	0.0507789	4243442	0.0273301		103510948	62695	0.0605685	36660	0.0354165
FW_9_06	7088353800	1542615	0.0217627	1877836	0.0264918		47255692	14668	0.0310396	16369	0.0346392
FW_10_06	10179815400	5506213	0.0540895	2030483	0.0199462		67865436	43690	0.0643774	17654	0.0260132
MAX			0.0540895		0.0321271				0.0643774		0.0412454
MIN			0.0203536		0.0182899				0.0286694		0.0248693
AVERAGE			0.0310332		0.0247188				0.040161		0.0322269
Marine Sediment
	Total Base	Map Imte Base	Ratio(%)	Map Allo Base	Ratio(%)		Total Reads	Map Imte Reads	Ratio(%)	Map Allo Reads	Ratio(%)
MS_1_2105	11405242200	1071357	0.00939355	1537744	0.0134828		76034948	11313	0.0148787	13683	0.0179957
MS_2_2105	12228635400	1212726	0.0099171	1737298	0.0142068		81524236	12616	0.0154752	15640	0.0191845
MS_10_2108	11836061700	1115026	0.00942058	1619692	0.0136844		78907078	10756	0.0136312	13477	0.0170796
MS_11_2106	10849373400	1001272	0.00922885	1414895	0.0130413		72329156	10136	0.0140137	12154	0.0168037
MS_12_2106	13628476800	1006183	0.00738295	1571849	0.0115336		90856512	10542	0.0116029	13551	0.0149147
MS_13_2106	12331852500	916450	0.00743157	1441539	0.0116896		82212350	9541	0.0116053	12387	0.0150671
MS_14_2106	10926314400	696481	0.00637435	1140686	0.0104398		72842096	7376	0.010126	9878	0.0135608
MS_16_2107	13004235600	1147364	0.008823	1689328	0.0129906		86694904	11541	0.0133122	14403	0.0166134
MS_17_2107	10440552600	781115	0.00748155	1245055	0.0119252		69603684	8302	0.0119275	10985	0.0157822
MS_18_2107	11042714400	1035156	0.00937411	1553295	0.0140662		73618096	10552	0.0143334	13320	0.0180934
MS_19_2108	13443564600	1397782	0.0103974	1887706	0.0140417		89623764	13691	0.0152761	16141	0.0180097
MS_21_2108	11221352100	648867	0.00578243	1087040	0.00968725		74809014	7003	0.00936117	9709	0.0129784
MS_22_2108	10871849700	708603	0.00651778	1186088	0.0109097		72478998	7790	0.0107479	10603	0.0146291
MS_23_2108	10165338600	674405	0.00663436	1121565	0.0110332		67768924	7332	0.0108191	9941	0.014669
MS_24_2108	10379822700	713920	0.00687796	1124336	0.0108319		69198818	7684	0.0111042	9880	0.0142777
MS_25_2109	10878556800	960509	0.00882938	1377323	0.0126609		72523712	9724	0.013408	11867	0.0163629
MS_26_2109	13606737900	1172117	0.00861424	1698053	0.0124795		90711586	11790	0.0129972	14446	0.0159252
MS_27_2109	10377917700	964221	0.00929108	1337101	0.0128841		69186118	9762	0.0141098	11670	0.0168675
MS_28_2109	11032432500	912551	0.00827153	1328382	0.0120407		73549550	9665	0.0131408	11902	0.0161823
MS_29_2109	11729376000	777002	0.00662441	1267769	0.0108085		78195840	8640	0.0110492	11604	0.0148397
MS_30_2109	11544088500	918431	0.00795586	1319997	0.0114344		76960590	9843	0.0127897	11991	0.0155807
MAX			0.0103974		0.03				0.03		0.04
MIN			0.00578243		0.02				0.02		0.03
AVERAGE			0.00812495		0.0121844				0.0126528		0.0159723

## Sheet: S2.7
		Pearson correlation coefficient (r)
Sample ID	Variant	Before correction	After correction	Improvement ratio (%)		Sample ID	Sample volume（mL）	Added G+/G- cell number (CFU)	pretreatment method	Intensity	Time (min)	G+ coverage	G- coverage	G+/G-
1-2	/	0.986531	0.98219	-0.440059		ST_Inf_202308_1	10	111000000	membrane	7	4	26.6081	44.5173	0.597702
3-4	/	0.979021	0.979782	0.0777151		ST_Inf_202308_2	10	111000000	membrane	7	4	20.1565	32.7468	0.615526
5-6	/	0.998682	0.997775	-0.0907968		ST_Inf_202308_3	10	111000000	membrane	7	8	45.7423	32.4711	1.40871
7-8	/	0.930707	0.964758	3.65862		ST_Inf_202308_4	10	111000000	membrane	7	8	63.6397	46.0855	1.38091
						ST_Inf_202308_5	10	111000000	membrane	4.5	4	13.9807	46.6464	0.299717
1-3	time (4/8)	0.925192	0.970563	4.904		ST_Inf_202308_6	10	111000000	membrane	4.5	4	16.2274	54.1586	0.299627
1-4	time (4/8)	0.929777	0.972231	4.56609		ST_Inf_202308_7	10	111000000	membrane	10	8	42.7859	19.0782	2.24266
2-3	time (4/8)	0.913113	0.949668	4.00334		ST_Inf_202308_8	10	111000000	membrane	10	8	32.7062	14.7196	2.22195
2-4	time (4/8)	0.906024	0.939214	3.66325
Average				4.28417
1-5	intensity (4.5/7)	0.962362	0.974838	1.29639
1-6	intensity (4.5/7)	0.958569	0.966709	0.849165
2-5	intensity (4.5/7)	0.946301	0.953066	0.714919
2-6	intensity (4.5/7)	0.939787	0.941398	0.171434
Average				0.757976
1-7	intensity (7/10) time (4/8)	0.831429	0.907226	9.11648
1-8	intensity (7/10) time (4/8)	0.716477	0.872367	21.7578
2-7	intensity (7/10) time (4/8)	0.803349	0.872074	8.55472
2-8	intensity (7/10) time (4/8)	0.685535	0.830592	21.1596
Average				15.1472
3-5	intensity (4.5/7) time (4/8)	0.820751	0.944591	15.0887
3-6	intensity (4.5/7) time (4/8)	0.818735	0.940161	14.8309
4-5	intensity (4.5/7) time (4/8)	0.840236	0.961446	14.4257
4-6	intensity (4.5/7) time (4/8)	0.842634	0.964206	14.4276
Average				14.6932
3-7	intensity (7/10)	0.959656	0.962051	0.249597
3-8	intensity (7/10)	0.871145	0.927167	6.43086
4-7	intensity (7/10)	0.934371	0.938647	0.457669
4-8	intensity (7/10)	0.830454	0.89677	7.98551
Average				3.78091
5-7	intensity (4.5/10) time (4/8)	0.703097	0.881732	25.4069
5-8	intensity (4.5/10) time (4/8)	0.583303	0.834864	43.1271
6-7	intensity (4.5/10) time (4/8)	0.700574	0.877167	25.207
6-8	intensity (4.5/10) time (4/8)	0.579517	0.826591	42.6345
Average				34.0939

## Sheet: S2.8
Sample_ID	Extracted DNA concentration （ng/uL）	Extracted DNA volume （uL）	Extracted DNA mass （ng）	total cell number ratio	transfer standard sample to 1	Estimated microbial concentration (cell/L)	G+ spike-in coverage	G- spike-in coverage	G-/G+ spike-in coverage ratio	G+ Spike-in Proportion (%)	G- Spike-in Proportion (%)	G+/G- spike-in cell number (CFU)	Total microbial coverage except spike-in	Sample volume (L)	G+ microbial coverage except spike-in	G+ microbial cell number (Cell/L)	G- microbial coverage except spike-in	G- microbial cell number (Cell/L)	Cannot tell G+/G- microbial coverage except spike-in	Cannot tell G+/G- microbial cell number (Cell/L)	AQ for microbial community (Cell/L)
BBW_BB15	107.1	50	5355	0.2142	0.0514854	1.76595e+10	37.8496	41.8201	1.1049	2.61185	2.88584	126567000	1449.15	0.5	139.595	9.33599e+08	1119.43	6.77583e+09	190.125	1.21117e+09	8.9206e+09
BBW_BB1	27.3	50	1365	0.0546	0.0131237	4.50144e+09	82.9376	71.8686	0.866538	5.53086	4.7927	96468750	1499.54	0.5	168.861	3.92822e+08	913.708	2.45293e+09	416.974	1.0447e+09	3.89046e+09
BBW_BB26	44.7	50	2235	0.0894	0.0214883	7.37049e+09	23.1615	45.5614	1.96712	0.870309	1.712	42532000	2661.3	0.5	164.859	6.05471e+08	2244.47	4.19047e+09	251.969	6.97912e+08	5.49385e+09
BBW_BB28	24.4	50	1220	0.0488	0.0117296	4.02327e+09	41.0855	22.8196	0.555417	2.59776	1.44284	42446250	1581.57	0.5	83.2715	1.72059e+08	1374.16	5.11209e+09	124.143	3.5917e+08	5.64332e+09
BBW_BB7	27.5	50	1375	0.055	0.0132199	4.53442e+09	81.3375	59.5217	0.731787	4.58337	3.35405	80776500	1774.62	0.5	112.905	2.24254e+08	1380.63	3.74728e+09	281.087	6.6061e+08	4.63215e+09
MW_DM1	107	50	5350	0.214	0.0514374	1.7643e+10	58.2455	104.374	1.79197	3.19949	5.73338	261108750	1820.46	0.5	346.545	3.10705e+09	1091.63	5.46176e+09	382.29	2.67013e+09	1.12389e+10
MW_PM1	38	50	1900	0.076	0.0182675	6.26574e+09	28.4067	26.9999	0.950476	1.9076	1.81313	68085500	1489.13	0.5	161.579	7.7455e+08	984.31	4.96426e+09	343.244	1.68825e+09	7.42706e+09
MW_SM6	42.4	50	2120	0.0848	0.0203827	6.99125e+09	24.0636	88.2466	3.66722	1.9066	6.99194	98183750	1262.12	0.5	150.132	1.22513e+09	863.812	1.92217e+09	248.175	1.28872e+09	4.43602e+09
MW_TM2	71.9	50	3595	0.1438	0.034564	1.18554e+10	48.0092	98.033	2.04196	1.70194	3.47529	65598750	2820.86	0.5	359.636	9.82797e+08	1947.35	2.60614e+09	513.872	1.046e+09	4.63494e+09
MW_WM1	55.9	50	2795	0.1118	0.0268724	9.21724e+09	36.3758	80.1743	2.20406	1.90942	4.20847	169785000	1905.07	0.5	193.317	1.80463e+09	1324.7	5.61061e+09	387.057	2.62627e+09	1.00415e+10
HYW_AS	178.5	50	8925	119	28.603	9.81084e+12	9.56641	15.3699	1.60665	0.679667	1.09199	286245848	1407.51	0.0015	285.412	5.69338e+12	942.502	1.1702e+13	179.6	2.90627e+12	2.03016e+13
HYW_inf	47.8	50	2390	4.78	1.14893	3.94082e+11	6.64776	11.6611	1.75414	0.257617	0.451896	90963600	2580.48	0.01	635.028	8.68931e+11	1650.55	1.28753e+12	294.904	3.16785e+11	2.47324e+12
HYW_eff	7.8	50	390	0.0312	0.00749928	2.57225e+09	131.12	255.279	1.94691	29.5498	57.5309	39359250	443.725	0.25	19.756	2.37212e+07	155.432	9.58588e+07	268.537	2.44024e+08	3.63604e+08
NP_AS	38.5	50	1925	25.6667	6.16928	2.11606e+12	74.9028	177.357	2.36783	2.56075	6.06342	1.4304e+08	2925.03	0.0015	569.425	7.24946e+11	1665.17	8.9532e+11	690.432	6.25115e+11	2.24538e+12
NP_inf	31	50	1550	3.1	0.745121	2.55576e+11	81.75	302.282	3.69764	2.40412	8.88955	85885485	3400.42	0.01	508.587	5.34315e+10	1540.23	4.37615e+10	1351.6	9.01999e+10	1.87393e+11
NP_eff	20.5	50	1025	0.082	0.0197096	6.76041e+09	307.261	759.177	2.47079	26.8406	66.3175	42060375	1144.76	0.25	244.544	1.33901e+08	627.053	1.38961e+08	273.165	1.05054e+08	3.77916e+08
stonecutters_settle	48.4	50	2420	32.2667	7.75566	2.66019e+12	144.033	876.586	6.08601	12.3686	75.2757	462923090	1164.5	0.0015	268.295	5.74868e+11	798.564	2.81147e+11	97.642	1.21796e+11	9.7781e+11
stonecutters_inf	43.4	50	2170	4.34	1.04317	3.57807e+11	45.021	220.325	4.89383	1.27068	6.21849	96425875	3543.06	0.01	364.202	7.80047e+10	2747.18	1.20231e+11	431.687	5.56758e+10	2.53911e+11
stonecutters_eff	96.6	50	4830	1.932	0.464378	1.59282e+11	30.4694	73.79	2.42177	1.31158	3.17636	123951625	2323.1	0.05	188.772	1.53587e+10	2022.64	6.79522e+10	111.689	6.41973e+09	8.97306e+10
YL_AS	75.6	50	3780	50.4	12.1142	4.15518e+12	39.5937	109.726	2.7713	1.80843	5.01171	220949967	2189.39	0.0015	338.013	1.25751e+12	1308.77	1.75694e+12	542.603	1.37352e+12	4.38797e+12
YL_inf	34.3	50	1715	3.43	0.82444	2.82783e+11	61.889	207.797	3.35758	2.87605	9.65656	75724110	2151.87	0.01	251.005	3.07116e+10	1745.57	6.36111e+10	155.296	1.23302e+10	1.06653e+11
YL_eff	54.9	50	2745	0.2196	0.0527834	1.81047e+10	89.1343	361.793	4.05896	5.2219	21.1955	257421500	1706.93	0.25	263.953	3.0492e+09	1134.46	3.22874e+09	308.523	2.22108e+09	8.49902e+09
RW_JR11	6.9	50	345	0.023	0.00552831	1.89621e+09	47.3246	86.8706	1.83563	4.24701	7.79595	12948250	1114.3	0.3	169.668	1.5474e+08	671.868	3.33811e+08	272.768	1.92146e+08	6.80697e+08
RW_KN1	31.7	50	1585	0.1585	0.0380973	1.30674e+10	123.065	145.19	1.17978	3.94925	4.65925	65307200	3116.16	0.2	466.908	1.23888e+09	1900.47	4.27421e+09	748.787	1.83542e+09	7.3485e+09
RW_MW2	42.9	50	2145	0.0858	0.020623	7.07369e+09	131.58	91.0843	0.692235	3.36468	2.32915	60968250	3910.63	0.5	314.044	2.91028e+08	2905.24	3.8893e+09	691.346	7.83098e+08	4.96343e+09
RW_PR6	34.3	50	1715	0.114333	0.0274813	9.4261e+09	87.3931	120.621	1.38021	4.01631	5.54336	33356750	2175.96	0.3	349.678	4.44891e+08	1383.94	1.27572e+09	442.339	4.85267e+08	2.20588e+09
RW_TR13	11.1	50	555	0.0222	0.00533603	1.83026e+09	358.954	303.567	0.845699	28.8762	24.4206	38930500	1243.08	0.5	179.579	3.89526e+07	924.693	2.37172e+08	138.807	3.28555e+07	3.0898e+08
FW_FW114	37.2	50	1860	0.0744	0.0178829	6.13383e+09	100.412	87.9317	0.875709	3.35497	2.93797	64912750	2992.94	0.5	305.779	3.9535e+08	2094.21	3.09196e+09	592.949	8.21046e+08	4.30836e+09
FW_FW116	64.3	50	3215	0.0643	0.0154552	5.30115e+09	21.0231	23.7041	1.12753	0.975309	1.09969	77518000	2155.53	1	253.305	9.34005e+08	1528.88	4.99978e+09	373.352	1.2988e+09	7.23259e+09
FW_FW115	79.9	50	3995	0.0799	0.0192049	6.58728e+09	18.8526	19.6189	1.04065	0.475164	0.494478	19722500	3967.6	1	365.037	3.81881e+08	2933.1	2.94859e+09	669.46	6.86673e+08	4.01714e+09
FW_FW119	13.5	50	675	0.027	0.00648976	2.22599e+09	88.4424	86.8052	0.981489	2.88604	2.83261	28554750	3064.49	0.5	307.355	1.98467e+08	2101.16	1.38237e+09	655.973	4.27573e+08	2.0084e+09
FW_FW122	47.9	50	2395	0.0479	0.0115133	3.94907e+09	33.0404	37.6095	1.13829	0.669049	0.761571	45276000	4938.41	1	445.407	6.10351e+08	3455.45	4.15983e+09	1037.55	1.33542e+09	6.10559e+09
STK_inf	45.5	50	2275	4.55	1.09364	3.7512e+11	55.4388	131.137	2.36544	2.07109	4.89903	51774135	2676.79	0.01	417.604	3.89999e+10	2119.96	8.36982e+10	139.227	9.24959e+09	1.31948e+11
STK_eff	23.8	50	1190	0.0952	0.0228824	7.84867e+09	434.434	346.547	0.797698	23.7103	18.9136	70057750	1832.26	0.25	261.791	1.68868e+08	1040.93	8.41738e+08	529.535	3.84889e+08	1.39549e+09

## Sheet: S2.9
Genus (total)	HYW_inf	NP_inf	stonecutters_inf	YL_inf	STK_inf	HYW_AS	NP_AS	stonecutters_AS	YL_AS	HYW_eff	NP_eff	stonecutters_eff	YL_eff	STK_eff	BBW_BB15	BBW_BB1	BBW_BB26	BBW_BB28	BBW_BB7	MW_DM1	MW_PM1	MW_SM6	MW_TM2	MW_WM1	RW_JR11	RW_KN1	RW_MW2	RW_PR6	RW_TR13	FW_FW114	FW_FW115	FW_FW116	FW_FW119	FW_FW122
Aliarcobacter	108791268000	2904357690	36906939000	9023172900	7868082000	19636934200	2817089300	20486552000	5349774900	3381180	26642100	32690044000	12164700	4059440	1093430	653580	298462	527734	3645660	1262010	1522080	601700	1828460	1955950	315983	39469905	8811580	6391720	469390	1032510	933388	3376240	859213	3359150
Cloacibacterium	98685230000	1125838610	518764080	3543606400	9333627600	3597464100	694259500	7751104000	769602800	253022	1019340	606849070	2309580	4489990	240502	121402	83110.2	59695.8	83921.7	329111	207537	205906	830548	178007	349445	6754678	9205370	11446400	3649798	390253	488730	1679730	221885	490586
Streptococcus	83151420410	210103000	4138030000	3339540000	6738960000	16537133500	1253538274	80658292500	9674849270	465506	2902080	821349000	13362800	2970220	4239970	1513130	2438390	1059570	1100420	7704100	10572400	7055465	7676290	7488760	783005	5719310	1933130	1592620	184886	2998310	2400820	8092210	1003200	3812210
Prevotella	63140753050	259703000	478798000	608424000	1678120000	14482061200	2023960000	5973436934	7127399515	127641	838363	185669000	11184400	4593620	10928400	5889170	2721640	3602430	5183430	11684600	16858300	4286740	8193580	10736300	1275190	14916100	6572890	9897090	1516710	8304360	6284650	16828600	2736620	7813160
Rivicola	43308819300	960362349	93884200	1093107931	4306751238	3135735300	393743000	168957862	429953350	94508.9	203305	101096196	1286420	2264910	71257.8	50279.3	11799	14476.7	40688.5	37484.6	73859	28403.9	463146	75032.5	160484	1195400	847662	7300030	163896	167500	298534	1168921	118901	335531
Bacteroides	42184399800	367397715	1826577053	936691390	1178211874	4655844910	723355000	11646448330	1818772360	122646	694942	624361000	4725420	971171	1700300	863298	442427	534884	720548	1871400	1983500	718949	1311990	1545090	257943	4330510	1971500	5689980	902866	1214730	923839	2615050	411686	1274810
UBA7703	39606053000	217088260	121457670	356922500	321869240	11968578000	60701224	1659530200	255426130	48243.6	215955	17709109	469737	184133	117522	24877.5	8092.15	5697.95	31444.9	143164	18123.9	132781	127376	102478	44597	590508	225802	4094290	45294.5	68648.7	40453	144615	18216.1	35940.2
Comamonas	34683093300	127991323	349966707	496568161	1711322751	6432216700	480298430	2031438890	1011239430	355972	1257530	522675000	3114370	1882680	725946	299987	184596	221092	310857	1397850	984307	230022	597390	587146	416650	1904430	1025010	3274900	682060	492984	348489	1121370	223773	565486
Tolumonas	29100017000	888245040	314388330	1243859300	1793637760	1998984830	296438600	335818000	669645630	70659	771091	287369060	2226820	935882	116430	100373	24499.2	54009	132663	188532	142061	52640.9	227659	88652.8	279095	1813600	3494000	25601800	943320	577933	95840.2	1164690	76542.4	327967
Azonexus	23764493700	7763400500	260635890	1233369920	4247075140	18841478520	1550969620	718248460	5722395780	188223	471345	84890513	7775360	8395140	1309120	506653	216252	351842	408465	2454910	1165410	283375	958163	760633	2470700	3805880	8739000	27206800	2152880	847047	613067	2736040	316684	880993
Desulfovibrio	22475548690	104465000	248856353	189320338	259984000	1261366740	227721928	490422599	752042424	38089.4	188065	57150700	2579840	481711	720293	169182	112264	94774.5	183404	812073	742479	462525	665597	634268	178573	828258	1038690	5627190	74280.4	480258	398241	1324380	181756	467130
Thauera	22467313900	489279520	1144661590	1247806260	1154112410	26111323000	470584560	2030685750	8113775500	291845	972140	646966950	24239126	1464600	611066	169103	104232	241387	312472	724516	352367	125706	380452	251524	169112	3441630	659702	1616430	158765	225263	221052	674802	144838	333290
Acidovorax	22465231600	636612426	162304599	695331440	5802208310	6399237800	556147500	1180342608	1019106690	1011670	398514	159943000	4273310	15576600	2773950	568927	400899	380364	627485	1234660	5182100	1026280	1941140	2353340	1272140	5060500	4209420	12904400	7139510	2722440	1386970	3542690	1075030	1609440
Acinetobacter	20655694100	185529000	841475000	1409947993	4508477251	5677529130	784348124	7349867182	4136977681	809612	6093960	2870390000	11955200	5997530	4766710	2520280	1480960	2251530	3753680	4562560	4862110	1772700	3531830	4701840	844631	16630100	5897140	5904680	2125660	3227740	2249060	6325110	1691050	4038360
JAGPMH01	19578500000	27124700	256337000	135219000	126098000	28453200	51616400	2423060000	141551000	36817.9	172429	101975000	468506	59554	12343.9	8937.63	29928.7	9310.35	13102.8	29240	82068.3	50649.6	87292.7	49666.9	5093.99	335297	159781	993513	15156.8	26617.3	49522.1	96872.2	16534.5	56591.7
Phocaeicola	19209115400	64588656	306561818	224482322	810960882	1419228980	322800516	1649890900	1085494465	63864.9	478395	467280000	1637100	691548	1020620	423685	384854	449671	449484	1290500	1417980	475009	1009510	918618	173514	2194720	881366	1946287	585160	852509	650725	1928260	319975	970326
Alicycliphilus	18847512800	462565150	40698333	124037181	291897254	4711527000	660768690	234742910	519074270	58021.1	84027	36845505	3321670	468255	147994	38397.1	19826.9	59866.8	45887	246247	257150	16082.5	73594	66981.9	69454.4	331790	346314	628358	118055	83314.8	55439.8	214290	47850.9	76638.7
RZYP01	17521099600	21096470	107386500	110697000	28534590	76074000	38526100	1435207010	104823800	11373	99433.8	45115500	940168	76697.1	26957.4	6949.46	/	3682.52	17129	70967.4	32677.1	39819.2	35689.7	30273.6	16857.2	405892	55855.8	462544	4986.74	29431.3	19621.3	44733	6966.77	47576.4
Limiplasma	16188349700	49177791	93975995	272680582	108614000	5957534130	333318520	506111260	490622744	11381.6	115520	14860200	1271640	154488	230036	66694.3	88757.2	42954	74200.4	500664	324801	400784	504535	339400	65444.7	901212	117118	1391510	33495.7	174301	176634	631055	97808.1	184010
MWDT01	15552947686	165598871	29087580	59076600	152809000	2540256000	79403500	32739000	113192900	8855.72	18522.7	3891790	655555	563609	15498.1	15614.5	23472.8	50972.7	9028.02	107911	34976.3	6773.62	35964	30132.1	107865	230859	374602	642158	32914	18377.5	49567.9	109670	11350.5	58081.3
UBA2658	14545647000	55340305	178256114	153095720	79767088	516886900	120312360	1331672600	259948210	17257.9	85051.5	16141044	386029	142831	95917.3	28115.1	37379.9	24712.2	13151.6	509939	64937	218417	216949	75964.9	36373.5	526294	68156.1	790463	16411.7	110305	90963.9	198862	29894.7	47715.6
Megamonas	13667185700	35785161	538136620	294658721	821307491	689575270	101926803	1364661310	265788300	48845.4	774372	387254390	954977	62169.6	135710	80189.3	56468.2	27726.8	83715.9	281624	192842	241756	230767	278480	30555.5	1034860	94459.1	430623	366282	43629.5	60050	273751	28745	143865
Zoogloea	12866444000	3328796400	97554687	612345040	3303417110	5665625000	1038993900	210075650	32704408000	122985	1135460	47721302	23105547	4169390	336834	210661	70889.1	69281.2	124710	428487	402479	95217.8	420020	207201	414847	1155250	1628090	11996200	334174	295893	311228	1278330	153714	318882
Macellibacteroides	12727550900	129905000	249110398	386349911	503708351	1114695000	75843750	945531640	174177800	21663.6	78846.4	76843274	473271	226410	22377.8	39349	3281.51	17925.2	13796.5	103511	54402.4	5644.93	54031.5	32504.9	23903.4	142846	943602	2934060	134540	65357.2	41388.4	291916	36259.3	63549.1
UPXZ01	12610170700	38973930	23914100	49957394	334099120	3289617170	44272830	78240744	241438500	7266.59	22693.4	5041660	207508	348504	236449	134084	56320	59870.9	64498.8	191439	269130	68962.3	175849	172438	38867.9	335031	604238	3265970	92594.9	153936	98193.2	245729	51681	146657
Treponema_D	12228328660	39082100	96188000	108759000	61344600	1305272290	379195000	726585000	1785902006	23310.8	166605	19918300	2148190	1241660	2938950	1799490	603571	786949	1167030	3068530	3678140	1466480	2662010	2756250	294320	2682010	1596830	863286	64996.2	2527550	1820250	5478600	644420	2393920
Bifidobacterium	12189257505	135832000	1147000000	443751000	1491930000	11123082280	1424721999	18983274234	2794235599	201505	1869710	422988000	7632030	703858	1848030	742880	708482	302884	468577	2583270	2626780	2518860	2733320	2983500	332308	5603790	598262	2033940	891324	1103890	989146	3082950	529251	1115150
Brachymonas	12031221100	98542590	109612408	129333399	483429350	2439388400	127103690	1438948610	373700140	62251.6	220912	55710334	809709	1024990	227361	113499	61986.4	60866.9	92262	333180	353647	77296	121139	220923	106506	644059	879375	1570310	190296	112021	145780	443412	94569.3	90492.9
Paludibacter	11890216000	277651510	248248620	157951418	1085568930	1964453230	219322773	309963110	694002440	21612.1	52856.4	12444900	1346890	1061920	757249	261704	246061	245535	253202	539364	803267	286957	626761	803814	172304	1088680	1194150	4557180	191220	528935	353865	1116040	161347	517618
Mycobacterium	11614962261	4129341521	1373600000	1394320000	793722000	196944176900	196054593200	18912678907	49315961871	4168060	12620800	230316000	220498000	8685770	16686900	3937170	10572700	1252690	2525160	23539400	10906500	8345070	9749080	17719000	15090300	227589000	4460430	21061600	2504980	4646650	3626660	10663600	2469400	6121820
Giesbergeria	11120274600	1073367160	28751507	789434140	516779350	6210309900	336988070	125504810	2278902610	154618	116875	23117300	5342860	4798010	324976	202811	50855.9	262860	199732	663139	529547	161919	260007	375372	372893	2236400	1793660	3198260	337640	266225	199788	753448	121407	320812
Parabacteroides	11080949700	24545419	154913568	85632037	162823397	1120020260	122296820	685799490	599156557	28883.8	204587	170881000	923978	372727	539815	263771	150906	351069	249579	706473	759831	235637	482767	599274	89472.1	782957	399768	1180040	140466	513230	325724	948216	154798	459612
Propionivibrio	10991437700	513832390	583793723	606237070	781738160	5831425500	248876850	3056559810	792324870	73489.7	281885	132693001	2497750	1116640	297551	126733	45122.7	85102.6	184686	562317	306256	71845.2	214798	279617	160961	982979	1353980	9659480	175866	269251	133293	638313	117752	190724
Blautia_A	10897908090	100705000	1363189060	342770000	1286897608	2961552280	560642724	9423792770	1736607290	162545	1597570	781404000	4081860	323718	668954	367570	475052	117734	193909	2009630	991956	1273630	1545840	1265490	199104	2573780	384004	1423080	480069	670443	537819	1773050	224285	832092
Flavobacterium	10748795440	1348622131	1196789641	1012960000	2708170000	39210234650	3048036351	13836703740	22852132750	342132	2881500	1909450000	45424300	19118800	46393400	16717000	15257100	19920000	13522400	29636700	33607300	12174700	18511400	30847500	9862660	148337000	33586500	20637800	9542000	16539900	13867400	22424900	5725070	22380800
UBA412	10549900000	6283120	6676800	77350100	76330900	581918000	54686900	32419400	281946000	5892.27	26748.1	2103450	143588	248777	40247	2332.19	9947.3	/	20441.7	69550.2	23333.2	34916.5	72304.2	/	27886.8	4622.93	41255.1	314289	4770	23526.9	27255.4	35347	1996.07	18758.7
Ruminococcus	10209884730	79860336	288471164	104359000	424170000	1876878550	528901195	924189855	2928926170	35261.8	281645	23039500	4367780	792535	1676310	697682	791909	266713	437860	2651210	2393610	3337780	2515520	3866990	258827	1931260	676468	634635	31413.9	1117560	948649	2976080	407999	1224410
Limivicinus	10024277700	67782600	97635500	403718600	81389200	4058449470	636710688	1112055870	1286684637	26930.1	232328	20053100	4190890	532883	1329210	310177	521973	318287	174043	1824830	1394340	1370620	1514510	1923800	184649	1651760	388785	833574	25797.5	877192	790912	2261010	262618	776632
JAGOIO01	9880940000	4612240	6399890	6548370	36817600	153127000	10949700	52498500	186208000	3694.01	10119.2	3803680	39602.4	52535.6	67351.5	1224.28	17715.7	/	/	65923.4	35312.8	12044.5	40834.3	28270.8	9771.81	29575.8	36623.5	164536	9946.11	11504.7	21210.1	52187.7	5886.18	18214.1
Microbacterium	9620456122	792493650	1207390000	680629000	837764000	86415719320	11944683410	9895513199	16502534980	1027910	1924200	204584000	183393000	3096470	9782620	2506570	2679160	890802	1466410	16746500	7401380	6897680	6672310	13055400	4066260	14006100	2347350	21117900	1557670	3680310	3546360	9459550	2371250	4311870
Saccharofermentans	9371261930	35180600	147408000	127239326	100445000	884980450	258698439	1612556400	1209983740	7975.85	154121	37305700	2504610	410876	944010	311388	253420	142849	229491	1343720	1159330	1170230	1360690	1434600	118110	1681950	398061	399636	32569.6	574943	542017	1713600	198329	736673
Paracoccus	9252194350	71606529	730230376	424346318	407961000	10607771450	869578030	7428595290	2368182320	291485	1281330	356057578	6646160	1713000	4564090	1982190	911595	1923990	2230070	3297890	2204330	922376	1243570	1600960	735451	10923300	1896680	2753000	578861	1179450	889466	3034630	697298	1396290
Brevilactibacter	9179039700	48175307	191054700	137630100	302648170	31727895000	187543380	2182204900	349780420	42123	140180	17856905	549223	145183	291636	48462.5	32765.7	45433	40480.9	81082.4	172400	324965	140551	421810	55624.4	509855	102581	679471	53896.9	62101.6	93339.6	265732	27880.8	105668
Klebsiella	9169839850	27364800	243882685	224828710	217557000	661926600	104170540	1494249090	212031647	80402	576239	411632178	643351	223940	308836	158004	71417.9	112394	184242	219047	260923	90166.2	155669	192624	64757.1	1187430	151140	703530	113898	152263	122940	433023	93205.5	205662
Egerieousia	9148605600	16299900	43855400	27076800	20158300	535795630	84737333	170433533	523784463	4681.92	37947.8	4877750	700000	331922	605031	328001	155989	108730	232743	786625	966555	217941	647224	432191	83631	1039220	315383	1034540	18791.3	517839	343863	1237790	185701	430462
Acidovorax_C	8501809700	674315630	42580088	97417362	706564920	1863216000	170836650	160496030	329326820	45151	94582.1	43143703	646919	779271	41908.8	25661	17280.9	24077.1	35594.1	48992.1	184241	39342.7	122709	126300	70006.5	807867	1072490	1413410	149328	61614.2	86190.6	262579	45936.7	101565
Faecalibacterium	8185857900	151622265	637237127	257102225	1053250000	2094443810	324499965	4051859950	707743887	117178	1246230	621549000	1242190	194804	250202	67382	92831.6	17864.6	98699.2	702202	363783	451727	638091	712149	85530.3	865853	119556	1456990	437353	176045	208168	799991	113445	236988
Streptomyces	7468430961	4166023313	612884000	388551000	242786000	529970220600	68358354700	2592679007	112283796680	1036640	5630310	91105200	227202000	11055600	56294700	13572100	13073600	3999800	8540420	67612900	49950900	39392700	33995000	85200500	11320900	66561400	8908740	33409500	1971540	18068800	17743500	33241500	12383300	22160400
Megasphaera	7466375300	29937724	69594208	56026268	188637689	471574900	54371738	430383886	284787230	35770.1	128293	89563525	662183	74126.6	237433	83067.5	113453	22874.2	31200.1	404142	244663	276252	276800	167339	56333.3	315936	74099.1	183592	125143	103875	110506	454436	41279.7	185402
Clostridium	7461937900	147046192	656475000	115327206	108883586	2602329780	2409111300	4053695000	10611731200	40424.8	556094	89401508	9639460	966807	4412080	7673480	2176940	671543	4893330	6522680	10211700	8167185	8519440	104887000	936224	4763920	1574300	2078130	110223	2746980	2165210	4696290	1091770	3185400
Micropruina	7399734800	80206383	873108820	522529435	1316028750	1770324592000	340907900	10326586300	1160027100	299224	418494	118845151	2014210	653058	48793.2	25660.1	45043.6	76183.4	33189.4	171662	76589.8	129769	120514	156920	132371	921095	147458	1739080	144782	64685.8	93744.7	163876	29642	54560.6
Caproicibacter	7068973200	12816336	19148756	42830147	18801275	288739000	85844202	184630190	215883700	7726.71	53305.5	3824160	522689	59398.9	42778.3	44250.9	60787.2	20253	18788.4	222825	123725	287604	199978	235595	27351.7	120384	45341.6	147800	9128.2	44066.3	47319.9	232287	28452.2	67763.1
CAJCBL01	6937711300	177626250	394665300	98281466	119776839	3957354600	63646306	101972910	168416300	8186.35	18718.9	6182745	468385	657324	114706	52178.6	9988.46	18867.1	17981	32124.7	44443.5	13444.8	47324.3	56655.7	39135.4	330903	173242	458906	31184.9	38157.9	24688	120150	14398.8	42053.2
Cryptobacteroides	6908206297	61713300	118987000	96960400	63942800	6808958520	1175150068	756528000	4981274984	32502.4	298718	29646300	7699720	1626410	6098860	2996530	1367450	1876340	2648620	5256120	9751120	2116930	4351420	6187150	503856	8069390	2514740	2448770	177142	4366350	2852540	7991630	1270030	5134870
Ottowia	6900442550	130648465	146704503	153871262	311342386	92344393800	1185817940	1538239238	8758663130	469145	215523	60914400	14099554	1392430	514443	227507	94306.3	290384	219226	711673	398866	148456	278127	389652	248504	2124690	644034	1393870	263126	336910	201073	657566	157001	346443
Bulleidia	6759449631	37384100	134960000	60224300	105507000	608843530	380312767	762180141	1674962470	13289.1	158975	18159600	3212990	328504	934361	350378	268888	161349	259681	1986160	964562	1788120	1821550	1954060	180236	1125000	302803	497985	20161.7	679954	634710	2459830	212658	747487
Desulfobulbus	6746755700	120213990	951527390	281731400	214405410	5698163900	104521567	514775400	384515690	16583.7	73806	33838845	1042650	172186	230296	89717.1	74263.8	66948.9	100920	251813	243880	172997	250065	201598	74247.8	674484	390453	4879510	61262	145416	120935	429673	33216.7	166928
Sulfurospirillum	6709227200	438164241	233143930	518053390	761552890	863715330	181762278	634762900	373390690	16495.3	154588	119740785	1278360	659533	383325	201714	69934.6	128311	172711	341483	331174	146363	329841	317624	135755	1436940	2816800	10973900	274410	436194	213778	1180060	135798	340261
Propionicimonas	6555474160	96823756	55854877	87316000	358079000	35907572200	369143400	602804400	437664350	23959.3	100394	7457910	1946690	330570	215611	47878.3	52870.1	23098.9	41786.8	752782	252238	349293	223250	702158	218848	977590	191280	963245	91291.1	109213	117373	310410	48390.1	115829
Selenomonas_A	6532687100	286731323	75775003	44247600	151537267	371687500	601387297	250594880	403394582	25684.5	561277	46744500	733558	98611.3	308768	135265	98837.9	34760.6	83638.1	332455	197323	384999	379303	202771	111795	368292	130512	480133	47947.4	185862	152540	655092	56756.4	226732
Brooklawnia	6424579500	34457317	77461900	109367304	294167000	6265932800	126056190	1013892200	435251900	19620.7	86017.3	7843140	534449	111894	32522.5	22093	35457	67970	43352	91265.9	86965.4	181090	73069.5	142221	59549.3	212500	179583	813681	39986	38319.5	24662.4	143433	7004.18	44932.5
Methanothrix	6354082300	65300294	11390400	71207588	93709477	4784086200	248594030	82505686	282635090	11715.4	129405	2221580	443754	107515	76766	27663.8	35635.8	4186.21	8923.08	589266	136233	118756	192242	187185	64930.6	183406	242215	1022480	54397.6	120497	78910.1	387541	30029.6	90725.4
Firm_13	6290557500	31300572	6263850	21418198	128119350	348643800	21853850	46313260	87506300	9160.57	36371.8	1723013	219539	233382	30164.5	8431.36	10857.5	/	5964.28	26686.9	31454.4	28591.2	57045	33757.1	8021.64	88733.5	6824.78	35167.3	9036.3	41238.6	35894.7	75700.3	5327.43	33011.8
UBA6107	6057569100	16661127	3653220	13218700	11351046	1618726360	52255187	12261890	488200740	7863.73	27469.5	1356220	362703	66280.7	146579	92557.7	35252.4	83489.1	56235.5	501000	226887	78901.5	115830	145052	29065.6	591518	97581.5	181285	19797.2	176040	93424.5	304653	51431.2	161663
Bact_08	6037268000	48707097	197048890	63760023	123420345	1089145100	103241330	374514080	333828995	10797.1	31764.1	9460210	656372	248426	310942	111071	110100	113123	169834	406422	414225	175192	311078	320211	68911.2	612653	1319650	3051320	128753	357177	172461	568613	69756	228004
Spiro_10	5978249800	130270430	20814301	9429589	25603908	622101380	133739911	17658127	32634197	2114.17	31543.1	623741	100037	224494	93068.7	40651.2	15612.3	6185.93	16386.9	62756.2	33263.4	29963.8	77113.1	33072	8973.18	155767	82495.8	161038	14683.7	67645.3	52203.2	136079	17758.2	48189.5
Microbacter	5811752000	45914436	11433479	6279080	53013614	49564060	30715338	24811716	62535660	1928	9310.52	1355096	157241	409379	49287.7	22214.2	7700.2	30011.5	10184.4	85938	51286.7	26640.7	64949	47790.1	31262.1	87618.5	73657.2	252719	19865.9	70931.4	41564.8	151092	22271.7	85481.5
Enterococcus_I	5790021680	8607242	34658340	22923768	42030086	792986000	37036490	515417840	244683050	8388.98	43529.6	3387660	1039840	96116.6	29004.2	22549.6	57915.2	22353.1	19935.2	135579	100635	267474	164702	204229	6003.07	112054	40191.1	73304.9	11547.5	41528.2	60754.8	187851	17253.3	61924.6
UBA7396	5787550000	76565700	123131000	71747300	244778000	33959400	28396000	402642000	442927000	2359.73	16858.7	14244500	898293	368402	82480.2	5908.93	35600.9	18126.4	70000.6	11045.4	204217	108993	150243	72308.8	76247.4	1154980	1225630	542709	20149.5	54113.1	26868.7	133096	16066.3	39595.8
CAG_83	5766038200	63382460	383542000	179914000	234024000	2731077760	387448930	3900819270	561786770	49234.2	375689	134897000	1670600	338382	521440	242368	233118	92439.4	100051	699971	801616	897372	737590	901964	102171	944579	108470	550012	105468	273792	276093	948597	118376	380352
Aeromonas	5746374000	182644519	413000190	1918711210	2864515600	2199164770	241066592	836283260	606372698	177404	928358	798979650	2499780	1014820	668041	225269	156426	198128	251626	493174	535440	166658	485739	469203	564896	2554190	3206480	4325730	763155	369152	423564	1433510	183198	578031
Butyrivibrio	5734466030	107013000	165604517	56627800	268180736	1196116330	273012043	715682100	2044726870	20036.2	159480	18793100	2732830	546825	925291	422242	551220	163460	301082	2512880	1506820	1801460	2017980	2387100	184945	1324110	321370	440488	16700.6	695023	647503	2241370	265751	850139
Azo_2	5663450000	18202400	3526150	5812660	10378900	69045700	29721800	7939320	34009200	8607.45	14728	2225790	67319.9	76524.6	6229.43	17080.2	577.637	6712.91	2790.02	33751.8	23145.6	3559.76	9013.7	38703	20609.4	49681	25987.1	92702.3	7450.03	8215.55	7852.59	41795.3	3485.83	19300.6
CAIPUE01	5661565000	11123920	7521230	4433011	18331830	247890900	7752410	52989100	62413720	2625.31	9126.56	1415707	85195.5	93336.2	49128.3	34098.6	11705.8	15062.9	6059.69	52398.2	71465.4	19500.5	37527.4	58780.4	28522.7	68919.3	160528	862611	13764.2	34733.9	27837.7	92457.6	14730.6	38289.2
Lachnospira	5543003200	54505057	599579375	94434416	193316413	770194220	222005630	1802907100	1819087240	23272.2	315321	202425723	1932430	181301	579467	208996	362413	89360.2	114994	1194000	668578	1053820	995697	1523940	97667.6	1037600	197068	339502	124605	380579	336997	985340	167274	531976
JAAYUD01	5470590000	7432880	5479150	6399290	18622000	41632200	8363620	60930200	13929200	1439	8164.55	2776670	34166.4	42637.2	37475.5	13536.3	1277.59	18783.3	6198.2	21971.6	19595.8	3852.53	13219.1	24651.5	632.12	10483.6	32195.7	284120	6715.78	19746.1	19412.1	56664.7	5069.36	17874.6
UBA1444	5255114500	19378878	4811290	25442800	51872960	793834000	16891240	26328779	107846300	9031.64	20918.5	1411613	369768	45231.6	22668.6	8164.08	6122.6	/	13362.1	125288	41583.2	22778.1	40670.4	57478.5	19027.4	99076.8	110989	841786	6218.15	27622.9	13841.9	77642.1	8739.86	18222.5
Ruminococcus_E	5161613994	99982100	779227000	161875920	570031000	5409785070	813971322	11961429769	3606359970	113163	793993	172347000	5493790	589323	1687900	818198	687449	227878	437588	3833440	2768140	3258870	3116120	4214580	431087	2810240	724525	1172680	257120	1295010	1046690	3564480	482156	1614280
Alistipes	5154425768	47778700	184603000	81269500	145825000	4047295840	606101617	556265000	2277932289	31625.5	282774	132760000	3753500	927458	2751800	1151570	758981	884963	1193730	3141020	3934700	1259650	2127940	2331190	330931	3865670	1434270	1453450	321648	2018590	1604340	4357150	681196	2136770
Faecousia	5011175759	102619000	265692000	141032000	122259000	5226834510	857122846	1571486391	3399624933	50027.8	386616	47754800	5746430	527429	1668680	661091	798702	212523	376697	3392130	3237060	2527550	3032320	3306010	477248	2576390	635648	1738260	66140.5	1429130	1086380	4201570	444536	1528080
Sphaerotilus	4910273800	117809010	16345927	28268423	425052100	2502290200	332973300	100065560	721643100	40527.6	37419.2	3471290	2566834	705446	282155	100963	36950.4	68285.8	38331.7	242937	227501	160742	130021	157250	595044	2370120	800488	1475760	2836284	251552	98446.9	676250	56151	132790
CAG_196	4853232300	17553587	31911218	12270600	23260050	302597270	96798863	121459740	795237340	6137.16	56506.4	11043100	579164	484479	926257	457304	240572	157889	282040	1203560	912076	430074	904559	804990	106842	794139	556214	728240	24799.2	811914	507497	1485690	242315	826267
Stercorousia	4804604000	13807643	23730935	9506531	21599453	72194810	44838942	103683020	403802030	/	59761.5	6942470	315579	537249	604245	207226	163900	188953	181819	531322	604401	299840	526531	520541	84270.7	537642	305119	608739	21495.3	441135	280384	936811	144423	410049
Nanogingivalis	4739244000	5420302	25723240	134750749	147904800	551104000	56943640	197454410	394639190	18273.5	50192.3	6689554	224240	418585	233078	70012	28564.3	29900	36969.3	146596	268778	73041.8	227517	199118	25718	368616	61948.5	99312.6	3506.28	69724.4	92495.1	314268	23724	115689
Collinsella	4733692934	53359900	339703000	147162000	421937000	4906307510	418123609	4896880471	797210114	112528	901902	201777000	2844480	274404	760724	162687	247976	120999	189580	863380	963767	977715	976628	1266420	134804	1674800	248424	957503	446974	492238	473447	1576250	199134	544209
Caproiciproducens	4589472100	9306620	22093700	25620975	12990257	437882930	88585740	143849850	191543440	2730.54	41847.5	3067190	444072	50594.3	145526	49985.8	71328.7	55774.3	38070.2	84581.1	108512	308185	280143	186582	18864.3	185979	51581.8	140587	5954.1	106720	69870.1	319891	26105.1	128574
Arachnia	4543918830	58985683	995427280	600101414	328998361	11181044700	430751500	13569199400	1022497940	60645.3	496240	86001700	2266231	250838	395766	136499	192590	124232	281507	684194	525988	1177280	504715	552213	202376	1518720	111204	998193	61918.6	221712	215054	646878	117360	242873
Gemmiger	4517715600	34372400	436664370	177871234	321996907	2200461530	203643154	4832037570	545307299	94293.4	779850	309842000	2474580	172682	317437	80916	214445	19356.8	122725	483750	301229	501558	521251	586758	58591.9	773677	109096	792066	253549	169270	169556	699703	81004.9	206931
Solidesulfovibrio	4446045000	27983242	95445530	65148450	36576327	444977340	74882080	134053980	153435610	5924.95	46707.9	15009656	719472	96771.2	158395	37933.2	37675	30435	39471.5	268036	164698	56841.4	135114	178565	28994.5	398389	93078.1	1256940	17184.1	181186	75487.8	306523	27327.7	206825
Acetoanaerobium	4404813000	116192100	2308397500	625600130	419538050	853453900	219677750	34463307000	522283900	60747.7	414709	262082280	971315	146195	126225	91150.2	34334.6	61097.1	43659.5	250079	59191.1	224923	150640	509552	20516.6	192400	109909	868150	51209.8	46682.3	28522.4	225636	25197.3	67913.7
Humidesulfovibrio	4198445000	41719885	70600470	72192410	51428047	569799900	64163920	95191830	130235380	3732.78	30797.4	8810267	447287	70790.7	115544	17063.3	17043.6	16766.8	21139.1	172666	167796	93429.9	119259	102589	44091.1	252418	217183	3165430	25932.9	139087	59110.9	180341	22099.3	93097.1
CAG_269	4080403010	89061542	385059570	80553622	131426168	833161700	664974729	1938507440	8325011700	20943.8	375860	91366108	5636390	549609	2736540	1031350	1196080	315988	585203	4728800	2852310	3646890	4228670	4049810	414437	2315550	883290	938036	56073.6	1525580	1221510	3390470	536093	1959110
Dysosmobacter	3983824480	46870100	170777000	108794575	111166000	1289656050	447818386	1358228271	981086846	37502.8	170813	52706100	2661070	285272	949029	183829	219712	67047.1	127890	1160160	774220	785528	920686	1174070	127960	1397150	194089	743457	54295.6	474204	404273	1436480	170284	480944
Pelagibacter	3746825621	220126000	575156000	143495000	157597000	11511551440	3435359268	1421548379	26128858401	219057	1355440	179757000	24524200	9032310	386007000	132495000	102617000	165952000	170895000	502903000	482660000	145802000	198266000	358786000	4348030	62501600	252056000	9466240	893418	132478000	223449000	177236000	85161100	348204000
Neisseria	3678914266	21741000	406509000	142277000	306452680	1592798610	244713821	7857331302	754306968	129993	1053110	309854000	868910	629347	770776	374711	232316	272247	399085	874909	761253	272224	500269	610295	108351	903099	349077	313060	57226.7	437911	345695	1060720	189970	441591
UBA10566	3593699000	7042992	15197299	11652026	28373198	436380340	47131931	37076660	348019700	3062.46	21706.5	3545911	282815	188944	260303	76519	71204.1	109493	71428.6	295154	386041	151920	322227	161637	37105.5	399096	497374	422099	79669.4	198113	162614	393178	69326.9	191731
Methanosarcina	3563669260	32541849	23990300	23168619	9403720	489586350	336356060	82474383	649570030	7168.42	84841.5	4970860	728590	116102	327689	123058	156792	77327.7	70067	521532	576240	406387	587798	498268	84848.6	402853	131725	283250	56381.4	352284	217908	740684	82255.9	244915
Mediterraneibacter	3482080550	45534900	382078513	72812200	348631984	1349304700	310046318	4653899785	892962810	43152.6	428549	118053000	1916990	185326	455045	211085	255635	111136	117213	1220740	670297	848617	1005060	1009790	98044.8	1095580	130925	454855	125997	458674	331309	976723	135121	541906
Aquabacterium	3450228500	1825654150	28594391	564432693	298613913	11426021000	604292960	144469391	1112804370	18270000	202219	14336600	21784844	6609990	931049	271982	112274	189225	241296	1449610	788631	297475	499080	560609	1040880	3553510	3561875	8952030	2440820	456492	302085	1211150	180700	434035
UBA1066	3333491780	22846080	46169500	36940900	71133100	893593830	210994482	329045629	560801629	19646.3	86971.1	4671590	1588310	165435	543408	92372.8	172136	55762.6	67591.3	752659	585580	502384	547504	1291090	59205.5	512101	134552	402904	11039.1	296033	233448	815134	119655	345965
JAGNLM01	3312050000	3462020	1272400	7929320	7286290	1597300000	11127800	6673680	8809830	4935.67	8869.65	606572	58342.9	17849.8	39793.9	18491.6	/	15167.9	2899.81	18120.9	31927.7	2352.18	4986.25	5468.15	9424.62	19792.7	102157	1112970	35687.4	23043.8	8469.77	89600.9	6384.7	9450.66
Agathobacter	3291864590	54628037	529235370	83631871	384766397	1574659300	171406192	2047015060	714214240	56992.6	535790	345293523	1182510	163606	377045	462859	257108	74560.4	294342	1068490	1194580	713521	795969	874661	100153	720703	135820	326320	233739	388163	314534	962246	160647	407615
Escherichia	3104469900	11946733	121045510	94670242	240535240	664098770	45439854	538278770	111980696	31701	300816	278557030	363439	94430.8	213101	34185.5	40124.2	47172.4	107057	152940	138253	49839.5	79446.1	96736.4	26416.4	627687	111466	488233	170473	73696.3	58026.3	226180	39279.4	157599
CAG_170	3070567200	18129500	101261383	123398660	76681496	826229700	116409322	691341620	219101100	8014.26	86421.9	28127400	608574	84175	131260	45646.7	93920.7	24077.2	33281.6	162284	242993	247925	306850	225450	37805.2	215842	77563.1	228320	88582.8	94455	69651.8	388558	48338.2	105976
Thermomonas	3041159500	129045640	43514170	67316470	106025425	5724761500	387158920	323698290	318611450	32288.2	89978.5	19127100	25869700	1442060	542166	221105	58309.7	71921.8	181950	472695	430059	75917.1	233266	229292	643372	1610780	809861	2343400	155778	181432	167486	561138	82031.7	179804
Moraxella_A	2969713600	4716808	56651344	198262501	1465022130	94401890	19444399	453795920	166729640	87810.1	333390	120973772	221979	658685	177084	125615	60651.7	102451	163832	171466	201251	79646.9	199425	97992.7	16782.7	385239	198528	284497	89158.7	105889	95837.2	283078	53576.4	184752
Methanoregula	2962476400	86445027	13607800	57409825	28782400	343510510	99759855	35630351	122307673	10052.6	56837.9	2978100	496329	193841	162924	88248.8	50731.5	13769.2	23411.2	543529	143584	169575	210725	141267	76948.9	308687	331211	1359100	63832	144500	101821	447108	46552.3	105581
Fusicatenibacter	2952916620	24683862	162750217	65391900	331790444	1218659400	89801241	1778341720	250981560	28363.3	270395	135960000	549347	52661.3	126507	11033.2	30573.5	12429.4	15489.5	497991	68775.3	66801.8	159942	96690.1	27967	244992	27358.9	146323	187283	51561.3	40477.1	138870	16283.6	75168.3
Aquaspirillum	2942150000	3849900	158815000	141814000	566583000	299401000	15774900	7267150	86495500	5037.34	20934.2	11725600	249516	207708	53421.9	814.788	1905.03	/	4807.58	12567.7	7794.41	17847.4	55741.2	23848.5	6527.49	328940	2030890	559940	45639.6	11232.6	34041.8	136011	21332.5	32716
Pleomorphomonas	2917773900	25746593	11276846	16888385	20878407	552774200	101669090	75044420	100199920	7889.99	24957.1	4381384	297352	78539.6	156421	68606.4	19272.7	17617.8	48191.8	89418.7	121348	36312.5	64765.3	89634.4	36195	153773	80117.3	390196	25752.1	81001	52755.8	217275	20658.6	83712.1
Cryosericum	2911202200	19918860	1595900	16582379	10261019	644290300	45184705	19846183	41540200	4712.22	11283.9	324732	147959	42143.9	7369.41	12727.1	43683.7	2144.5	52461.3	124880	45232.1	39456.5	65890.7	74395	8360.87	8186.62	23706.2	319788	6921.22	21747	20074	179556	15975.6	36215.5
Bosea	2897868380	72641082	18027600	28886700	53478900	9808545900	816727780	120620922	1088543800	2071040	125772	8303160	5964030	957976	1041190	374637	279858	258462	176561	1245040	1416300	407758	505450	828373	631164	1712110	912632	2155310	591002	1647080	378066	1001730	214213	585064
Akkermansia	2854535714	6869340	29974800	14746500	30132600	779816270	110852252	145596000	219808046	20084.7	71857.3	21957600	567504	125082	770045	240040	182155	246124	200407	592111	1335090	294508	560707	695880	72624.5	662397	285154	330472	28612.9	534291	441573	1242410	160388	573395
Xanthobacter	2734105000	10712836	6149905	7500577	10378751	1541262800	200299640	44879910	258799110	44912.3	48264.9	4259860	6893806	165438	292144	67579.7	57597.4	25033.7	53148.5	164835	171824	52638.2	104493	192568	97884	359051	91708.6	270336	35747.5	850950	77322.9	256482	57485.3	482926
Pseudoxanthomonas_A	2668293310	22439900	34161200	36016800	86613500	3281383600	346629920	262043986	619753660	117919	105336	21691300	4125110	631354	702466	317939	78916.6	103723	184873	561639	627626	138329	274377	443207	139906	772332	377414	2087290	117696	343642	206171	748964	118311	415894
Enterobacter	2632582960	16082800	122423000	97734829	129008889	663976750	102749243	737452250	229843608	46382.4	274686	205279338	389512	185224	268913	149348	60457.8	92907	158288	332531	467774	102383	248219	232529	137579	622965	217979	1343610	240295	258310	151058	407433	102185	209345
Zag111	2628229100	13154042	26018177	8575810	20393908	338695480	58986062	85781580	435414150	865.893	38476.5	8116900	410078	231612	457510	250849	140975	162403	209391	628475	613688	237341	523259	550230	52791.8	617804	309784	346319	28944.6	436756	386834	940984	150970	396501
Holophaga	2621348200	203717600	12401982	14998271	37332974	756021420	184809620	16676275	90039782	3704.28	16009.3	1307910	108553	272489	75773.1	38756.7	13224.5	21643.6	23724.2	120710	116828	51646.7	66167.9	102767	31557.2	96678.9	385256	2047180	31157.7	179269	50856.9	222142	17337.3	87190
JAHDQW01	2593820000	1152060	1120000	1660100	1598880	33964200	8243450	2036230	54098400	2367.44	2076.17	986003	42078.2	5664.84	3845.94	8313.17	1829.22	14854	12167	4362.76	30194	11186.2	15452.4	20341.9	1621.53	10641.7	11944.5	24597.5	499.685	22385.6	18671.9	40053.8	7846.69	32163
Acetanaerobacterium	2535650000	3132330	3730750	10818400	7235630	32423200	1054310	30386100	68844700	/	3883.28	537626	66986	9486.08	15182	5951.71	18319.1	/	5441.23	17542.9	19401.6	27283.1	8538.77	28598.5	3264.69	14232.1	11952.9	50927	648.379	7796.46	2329.61	37140.5	1293.13	5212.57
Veillonella_A	2527954110	224200754	211297524	111912911	138582000	458983870	124893209	661003978	281669970	43318.9	327419	179298000	1052110	45678.2	162151	50837.9	15785.8	14673	32592.1	172198	114690	215829	271152	156741	14166.8	682106	71096.2	62890.9	5090.19	140895	127254	290390	26858.2	217122
Enterocloster	2526998600	18640826	126924290	43119600	118018000	480997180	136964468	660086930	488410251	17345.1	135964	77599800	1215880	96764.8	339346	118219	154846	63999	84299	586954	374988	522138	493633	561054	56163	617166	230644	407407	49528.3	317302	183077	564741	80920.3	477787
Leucobacter	2480706140	76489548	258016000	115300000	109892249	9026492130	1187754490	2147269640	4569658750	49299.9	345792	34914400	5757660	466158	1086870	229051	527344	305330	188769	2194830	1054410	1186390	949964	1623930	297895	2163310	611837	1989640	85531.8	513078	466072	1247900	230426	566996
Anaeromusa	2407554400	10053392	12309500	25024147	36025000	80794830	6773520	100742800	116718700	2033.79	13537.2	7090500	99089	107576	28326.8	5558.01	24943.1	4783.16	5547.51	49208.6	16931.3	66880.4	83613.3	22472.3	6567.75	34578.7	46035.8	776943	5341.23	17965.4	15866.8	31265.9	2659.55	11319.2
Rhodoferax	2399881560	425801261	54754300	82466273	400871674	24323281830	1138460667	175059305	2953982300	1122320	179357	16943900	4832390	17825600	3431640	1570230	574889	901013	1702060	8452650	2809810	763512	1472200	2540450	4594030	5122550	6098450	11157100	10637400	1703930	1062890	3815770	931771	1917330
JAHDRN01	2356340000	3122410	1079230	5168010	13747800	73594200	5336750	4381270	15504400	/	3130.82	532493	26800	19339.9	3465.75	5817.53	12441.9	4812.8	/	12734.1	43183	15650.7	5332.86	13532.3	912.89	3837.67	56024.8	740480	1144.7	15145.9	14795.4	37918.1	4097.19	21548.7
NK4A144	2334335120	15720800	60646264	18096600	87874484	411554130	197479409	225115350	655911900	28168.2	88324.5	6046550	1347610	202954	451564	240992	259629	128708	129123	852856	882751	745675	769875	1309590	101478	1006120	170186	210584	8389.89	376442	359033	1069960	179032	465827
Melaminivora_A	2330708040	16680234	3582630	11278800	31675700	996541000	47745940	16523055	165074370	28166.9	10812.1	2509940	215049	122523	37611.8	12966	8533.91	14440.2	12198.5	73311.6	34515.7	9990.89	20991.3	23708.8	16845.1	74066.3	48780.1	134798	24969.5	31651.6	27923.8	79320.9	13013.4	21068.6
UBA1038	2307549300	4453943	7883201	17707000	64305010	2341892000	39800680	61708790	85562110	1110.56	11031	1297900	80223.7	22675.4	57085.5	55153.1	3981.19	26246.5	18730.3	125191	48798.8	53990.6	78046.5	86742.2	15815.9	71233.6	73200.8	112287	9710.23	81834.9	75534.2	152263	15527.6	109597
JAGPKJ01	2271450000	3988150	30654100	435082000	93544700	189583000	17651500	2389310000	90932800	15096.9	95045.2	31830200	563545	132005	61665.6	7427.94	3364.43	3036.01	4552.56	20810.5	26380.3	34049.8	22135.6	45674.2	3685.08	28572.5	8464.46	30987.6	4511.09	20350.9	9695.64	23170.5	7066.69	27724.2
Dialister	2243640690	21983209	103370000	54518600	117618000	668978660	101566628	934445143	729526000	21906.2	188661	109446000	1014730	74221.9	296330	122400	113324	37842.6	94480.2	558210	496295	401810	600544	854134	45535.5	636114	230799	255982	188109	307165	237249	687286	92818.5	399037
Kaistella	2241605060	21994100	29469378	1567107470	127731598	1917982600	188913159	641841710	721219410	29200.3	104298	19555600	1836990	1004430	797523	353971	220024	367624	290893	826358	720073	353245	565328	602065	146371	977638	342643	713735	47684.4	446297	332129	938716	165294	453267
Contendobacter	2218755600	34511583	10588244	8717007	24891600	17391345000	570422540	10576300	228847830	5962.98	80950.3	5905450	152042	94991.2	127594	34082.4	59137.5	162095	78181.1	118489	126020	14139.5	57321.3	193599	58295.5	927548	169782	218491	25149.3	81742.2	41117.3	118548	14149.2	82611.6
T78	2167734200	10512094	12006500	13074700	22495600	4024834900	79982858	204305207	967488620	5691.89	23399.9	2206780	202933	110113	336741	79404.7	56032.6	114418	136625	636227	413596	72270.7	208451	213684	43591.2	571328	191235	616668	15014.4	190803	149322	430914	64934.7	162804
Bdellovibrio	2152244000	77115820	4267240	6862680	17948400	2288880130	102240370	29892586	679136830	2993.59	28591.6	2004470	3790440	1814700	208945	118514	48228.9	66341.2	53110.7	195304	253335	102735	141586	177789	325759	646421	797339	2243560	94226.4	164618	111060	399487	39895	122754
Pseudoxanthomonas	2122648340	13773323	15297200	18508569	36212800	2396517300	193125060	90758823	204316193	21042.5	36269.5	8559100	1888010	233045	499702	132100	59139.1	75825.4	150509	297249	409414	76697.5	176009	222616	82999.3	437145	157489	1869170	58329	156012	138284	353400	63463.9	107393
Methanospirillum	2071462700	5619508	6111070	13023209	15655347	36341000	11481890	35164602	122162660	3215.36	20723.7	2095000	152272	43726.9	65970.9	16231.4	28960.1	19859.3	17933.3	194169	150822	121722	142004	194477	13099	181337	79147.2	746352	15188.9	83299.5	37875.9	147219	14048.3	72822.6
Rhizomicrobium	2051087770	251262061	8894540	6138730	10025400	8580373910	7933313370	32339900	345243988	325933	355833	6473880	1703950	1270630	872302	439439	203620	206221	315080	695712	623743	353446	529367	788152	363029	736095	709048	2175020	157285	412631	309978	833061	168057	360314
UBA1383	2043296210	12602550	111129200	79410646	84517830	5218714000	143356431	1029681670	234369900	6586.65	68481.8	11182300	362342	55697.3	89241.2	30662.6	32518.4	48348.6	72833	130811	96768.4	207653	163730	151357	46068.5	1223740	42976	181432	14899.8	59587.7	50026.5	133997	17829.8	88310.2
UBA6016	2042690000	11164300	7037060	19816600	108333000	17098400	5667290	8534760	53308700	1113.19	4578.91	1785310	58949.4	45224.3	19236.9	6006.33	18026.4	10076.5	3339.37	27111	18798.1	33926.7	9920.69	4177.88	9622.61	206926	115852	1517250	8211.15	22874.6	6183.72	28018.1	2281.11	6955.25
Acetobacteroides	2031812913	9034690	4429370	6720400	21277100	144896000	15541720	8343073	45013600	514.004	4746.7	723808	47406.4	86003.8	53759.2	8828.67	10744.7	14062.6	583.683	38832.6	95142.8	16077	30512.2	38690.8	16745.7	86288.6	109412	236653	13901.8	35039.1	21902.1	73761.1	10352.9	42121.1
UBA2813	2029075200	8148869	13730143	5665720	9710950	158035890	47745260	50184950	414957030	694.975	32407.2	4357820	399402	268686	632920	167259	124083	71977.9	186483	347307	607202	233414	488562	428380	49034.1	289763	359084	332363	9428.61	331058	245480	784622	121046	288747
Novosphingobium	2020243690	189173040	43091200	46125300	83538600	34923675200	1421741210	260648850	7743301630	3178400	419807	103410000	38431700	2912200	3056920	1476910	650345	841822	874108	5004730	2349030	787110	1072990	1478060	4129520	8450260	5301050	12356100	2949260	1333350	973317	3352370	650697	1302980
UBA1174	2008745000	9084271	39852349	16357627	20991011	594313700	21462930	41945460	102834330	3316.61	14567.4	3493980	140413	64772.4	119767	51026.2	166869	92325.5	72334.3	166100	292727	41203.9	127708	88405.3	17989.2	112592	127633	408163	16565.3	120738	96591.8	195080	53176.8	104269
Blautia	1956282450	22928600	142068533	35562422	121413857	354308490	143411083	1304994380	906503450	12861.4	180246	54426800	1417810	90113.3	323150	179937	158403	39783.5	123946	656152	287135	495372	571690	579506	60155.9	549969	183542	668676	45714.6	244659	225836	736164	98670.2	305538
Scatomorpha	1947944700	13423254	14729124	54874591	18314605	856769550	137949218	260328070	189194980	4918.3	37442.7	4729350	839522	72735.1	226899	45917.4	103037	48907.5	19818.4	411116	329400	307049	183040	214686	33548.2	481535	120917	194830	4471.01	97677.7	102394	435763	44944.8	107028
Chryseobacterium	1947576180	59701300	108905678	253577615	191295000	3529971140	627181862	866052392	3693213940	42289.1	275753	50390700	6337970	2289180	3951490	1902700	1207630	1562460	1468100	4598130	5518900	1956020	3303660	4057760	649827	4384230	2073730	2873430	292952	2828810	2020170	4949170	886546	2535170
Geothrix	1946220800	317710470	5190596	5911060	21324900	2109560000	690560520	14409100	172380327	8055.15	75149.4	1240960	182384	532418	201590	132526	39314.1	41550.8	52185.4	242522	330506	83208.8	150306	208361	111421	296777	330715	1468130	49110.5	177986	129072	464625	53686.7	161561
CAG_103	1927196300	18605652	167615650	68646770	69302057	392713700	108129360	1492219320	505878910	37037.1	77971.1	25347700	505311	65876.2	124585	58520.1	65247.2	9988	21735.7	1041680	256930	163254	224035	315928	22967.9	398556	33175.2	158259	46454.5	72921.6	77525.6	424011	27882.7	86845.1
Brevundimonas	1919872325	32841000	30709800	47492100	65473800	5500288040	719918317	211088000	1121796461	201646	139687	17120172	22158500	3335330	2039300	662222	675281	489515	428350	1431510	1976740	692198	906830	1472910	450531	2436330	965668	4420300	941150	1278000	992675	2494290	1049190	1264280
Mobilitalea	1888167300	45718136	150320800	24540922	66636533	603250480	233671870	506380210	1693442800	2937.73	93778.2	10450800	1545250	325880	773437	367778	613617	209512	168510	1482200	733185	1688870	1001750	1617480	102197	934501	227738	313134	13022.9	437944	315379	1089140	154991	470927
JAGOXX01	1883430000	52175100	41583500	183138000	413527000	146420000	29874600	103098000	59516200	19535.3	70338.7	42004800	250137	195225	89237.1	13331.7	7373.6	18670.7	33965.9	14722.2	24455.1	17572.5	13171.9	18566.8	16908.1	315754	339640	1392130	85359.9	53835.1	6477.66	68328.3	3236.84	24164.4
Stenotrophomonas	1858626434	47697000	33743000	28713506	47423200	5302842420	598608890	172526000	1179991938	60033.6	117342	22615000	3659180	883685	1763920	645210	964289	397776	477968	1272360	1969880	700105	725789	1142560	228753	1744890	557940	3107160	168444	786792	564586	1567860	296165	647505
Oscillibacter	1829613590	7632290	11366572	66283393	18092421	215809800	36258746	875467260	151696310	/	18888.9	3496022	531488	38865.4	32925.9	5886.23	/	1723.01	6992.76	45475.5	115135	119578	65868.5	95006	3430.12	168354	20432.1	129321	2323.68	26145.7	27282.3	120784	8359.97	23982.3
Gemmobacter	1794969900	31678305	40721191	34211599	122229540	1174059780	311755340	371820940	430599100	25978.5	115425	26226876	635953	435085	278898	97779.6	52393.5	133146	126944	327101	226190	82747.4	129185	183805	270080	2462410	803351	985315	224621	173730	98861.1	696513	54398.1	175098
Ideonella	1783416100	100778660	10764850	23652590	74207599	5396988000	273287730	49295982	1004108720	226115	39749.9	6285300	30727600	4284920	427393	170969	57156.3	112071	153416	538030	626482	139215	243373	465649	1398420	931948	1344080	4075370	1304600	276675	145840	532567	96713.4	176580
Xanthomonas_B	1772322500	3887923	4981878	9113780	17481440	105776420	38410600	44038320	50983400	4999.18	17389.4	7428594	3068010	44671.7	72510.5	92089.6	28432.5	804.588	34582.2	54068	171903	19763.3	38633.7	139881	4932.45	58630.1	20189	54035.7	18570	79207.9	16460.6	61249.1	11459.8	32641.8
Ruminococcus_B	1758843874	10875698	103882033	23625248	151244757	197731000	46193517	1212562680	202569500	16017.1	131958	56152600	1395550	19820.7	32776.3	11223.8	6969.63	10992.2	15480.8	73856.1	17415.7	67238.6	94292.9	278430	20173.3	432104	24047.7	193060	41927.9	22922.3	47948.9	122177	13689.6	85847.6
Pectinatus	1741743700	30927509	50280996	14300900	24431950	64243100	78989052	259470046	159613000	5534.99	73157.9	22871500	504538	36294.8	133485	6586.99	32208.1	23660.9	16412.7	132854	102584	97738.6	172830	181081	30786.4	153926	40075	113463	6820.67	91572.4	62305.2	169491	35710	80513.1
Fimenecus	1734671820	22806300	224816000	52312500	85213600	526631700	96586457	1749576256	694451010	22291.8	161571	41429000	2158480	160823	306324	147447	203262	62438.6	79802	683244	469344	576270	689482	868807	93443.7	1005890	118718	319798	15694.4	280203	197197	690920	84309.9	297426
ER4	1722470500	18828768	154257022	43649284	90905213	546289690	181544953	666420830	471156150	14216	134554	53768800	1001250	89040.3	91780.9	60685.6	138952	33952.8	60219.8	388751	351681	388659	298922	324563	42287.2	326645	87559.1	238105	54651.7	122629	151576	388181	56974.5	134362
RUG705	1719061630	36530234	472632063	99827854	85095058	260726500	148260060	1389095300	676315300	5259.9	104022	131672075	1628830	167485	529079	447839	132737	59104.1	196320	1186210	311470	958534	761399	655426	110451	545685	174225	253592	20144.7	289875	240547	544531	114680	338750
CAG_245	1702592310	10730545	70705572	14553294	28608440	284430900	49185330	495793380	341308200	5720.75	60944.9	17848950	343944	51786.1	148251	44096.1	170917	17271	23212.3	256606	119980	292594	341140	139116	21630.4	109336	69374	81619.9	5347.62	117941	91204.8	231716	47556	121108
UBA737	1696408611	50908000	222982967	49540000	30380999	1809886200	313590099	746689701	3199610900	15199.4	190513	23944400	4919860	356630	1424470	341749	766124	379248	220995	2449190	1660860	1720310	2087600	2319980	285515	1692620	571443	607586	27525.1	837830	767858	2372710	332996	891009
JAAYPI01	1695034910	27715837	905668085	134738219	168216000	954577000	44656433	1207661590	134836240	17603.9	51489.5	33498700	320872	185945	46375.9	26759.8	24138.4	8796.08	28705.7	68912.9	56205.9	30400	90069.6	79398.6	23079.7	426182	82925.1	230728	21355.4	65007.5	41292.8	155337	25958.8	65819.4
Holdemanella	1689240800	7129490	86874030	36068470	102024170	411887300	30846450	1234843300	409259300	9502.74	151556	56728100	283726	42252.2	94871.2	51573.1	134244	35271.9	26519.3	174819	136915	270254	303855	163562	21486.7	217280	54800.3	128180	51587.4	80673.9	95759.8	318014	40851.2	104293
Selenomonas_C	1680623300	11135286	58587800	24432769	30821396	194215600	67410490	181775970	54800450	1662.9	55883.1	37575500	188172	28151.3	71541.2	/	29672	2626.25	7158.84	145939	121655	62087.7	106896	52278.5	8838.92	205503	11983.1	26537	2517.88	35153.5	34395	163912	14365.6	28937.8
Diaphorobacter	1667240000	18133700	9532470	14325500	72425800	234337000	16479400	48549800	33381100	65377.8	25913.3	7853150	299895	131101	23131.7	7951.45	1995.25	6605.88	1528.67	27774.7	8815.69	8821.92	21446.4	/	9670.26	19022.2	25984.3	81128	22918.7	8362.8	14450.8	214780	1715.02	71691.6
UBA6984	1654517000	5965254	14170548	4523920	7972008	16835700	37208420	58552250	307732650	/	19135.5	3252490	219182	157285	258697	104524	53295.2	67450.7	163985	340896	452957	117976	295714	394678	23889.7	282599	155666	228213	11282	239952	148876	574307	70657.5	222513
UBA2212	1650535510	27617640	19499402	20964289	263202450	1440722090	18240910	137999040	220649680	/	16605	4509767	351003	79366.9	56908.4	37522.2	89394.2	5537.09	21899.6	177057	70966.3	320097	180980	189280	31228.5	116318	228217	288382	53621.5	85817.8	50253.6	178899	23772.4	82924.6
Shinella	1641117600	15985636	9668806	20711727	33780319	1072394000	165737040	100225250	182198550	13386.7	33690.4	5241233	503734	383492	185415	66148.3	29620.1	46956	39983.7	220923	208612	52727.8	73675.3	116797	39379.5	337034	110782	388701	64586	105998	61116.8	215545	39143.4	97643.5
Desulfomicrobium	1634408710	33695008	3558861400	388848520	139173144	2044529500	69195081	2374993320	304681180	20523.9	126815	84272148	1080620	94026.5	95671.5	23392.3	27482.9	17379.9	42664.3	271826	162448	103809	230895	157385	23963.6	1268560	253280	827795	34340.9	71986	86756.5	305269	29293.1	113663
Eubacterium_R	1633025500	49118700	221189607	50592900	80901600	804540800	329342823	2053497590	2205302320	15546.7	213469	38298000	2651480	341475	1759630	357228	590783	119461	206043	1831030	1354240	1924840	1919740	2082140	156971	1277970	346175	418275	50953.2	759612	618822	2107640	295495	948897
CAG_791	1627300760	25398700	103935000	210235000	85641000	1055714930	408808408	2694370600	733832890	20832.6	156316	34997800	2344330	175169	593346	321526	162199	69971.5	119855	1034510	790495	741349	917441	836122	110873	843605	189617	370858	9870.54	419722	331764	1211700	127328	441443
Acetatifactor	1627150440	50697200	273231010	53585000	166962000	1577389790	413463890	926196748	2303325300	27636.3	251479	77709500	3059700	326448	1520160	710680	555137	189901	365546	2000800	2121140	3225520	2398270	3572040	198236	1460630	391473	571947	60066.4	1059400	763802	2515280	336144	1054280
Enteromonas	1624939210	48052900	29876615	298176080	79567265	663815730	96088640	826998790	1028573890	9247.52	49034.8	5707520	3281800	619316	374132	383766	187087	83174.2	107363	1520880	530062	665729	537330	846055	35314	567855	61375.3	136767	11867.4	236644	307713	994688	73912.5	251377
Syner_03	1598732000	7444336	9339198	13432091	18307586	278886050	7527497	58868440	114026280	308.558	20121.4	3410570	76728.7	32449.6	73251.5	20201.7	19537.7	25030.4	22191.2	91449.5	158767	25349.5	51757	130733	9724.33	115286	462447	2148763	44768.2	66933.7	24061.9	189124	26290.4	26752.7
Azospira	1586547300	87419900	5204110	24821930	45516904	315439500	42113936	17400200	70599510	7203.59	42747.8	4747730	97090.7	100275	35512.7	10690.6	3062.88	548.295	9156.28	95396.9	47096.8	13099.6	25874.3	37449.6	34774.9	58264.4	280385	1029750	42862.8	33885.5	22330	87601.2	6475.69	23145.5
Veillonella	1547258164	22953000	210453000	63224800	65752500	748693300	124827811	1053231330	869149290	9516.95	120669	49378100	1253820	101284	346182	195613	179368	56574.1	83227	814661	333530	671295	665344	520498	55028.4	583596	123850	396867	21585.6	237952	281833	697085	97642.3	250876
Phascolarctobacterium_A	1535950100	16556136	80306447	32631800	63090600	317895550	77704804	513476360	461862920	7316.37	98807.3	31354000	1353200	91844	261910	111133	86141	63770.8	103270	1580610	392199	453422	462909	401261	59411.7	323321	85163.8	440213	22907.2	222223	145429	588451	78789.2	226218
Phascolarctobacterium	1532372200	12906072	217399322	68559151	90263605	129203000	35959820	889113180	113509720	12911.1	141315	149317716	302755	31698	29360.2	1542.82	18363.2	3770.39	12567.4	94889.2	34021.5	93530.9	63552.4	14006.8	23369.7	209117	37440.6	143869	30165.6	69160.2	50004.3	164913	10278.7	88844.3
Dysgonomonas	1531269500	13756476	34662382	16097122	22939513	432831770	92619496	198330520	531885750	3648.67	41964.5	7781260	718441	188674	538834	268615	166151	187969	178066	541289	758571	248908	498267	514227	94771.2	742572	304368	587206	41999.3	449654	296912	817538	147021	441343
Roseburia	1530245630	28716214	236941895	42228786	183950099	382180280	146808730	907832480	669705380	19878.3	166247	88208800	1200470	120625	303340	108946	117135	46366.8	58989.3	619326	545789	591148	679573	647828	94701.1	677790	115157	220576	71162.4	202531	160884	641852	86669.7	252684
Ruthenibacterium	1511402500	10421413	34730073	66471897	33055215	409752800	73889240	209338320	156519080	10597.7	48270.1	16524700	116898	45238.1	116436	30990.2	58519.3	17454.9	39551	228826	146345	174479	177003	193046	27874.6	191499	35900.1	205862	9489.19	63431.9	85086.4	312381	31532.9	68732.9
Anaerostipes	1500660720	30023021	350417960	74073028	141511795	420964230	153262311	4485059000	704239980	42648.7	413795	178922023	860829	110566	271717	114238	182062	62727.3	122231	576981	254514	575419	626546	472823	51643.4	591841	68571.5	209341	98600.8	172943	190935	627001	53600.5	235788
Polyangium	1495301800	3863535	432612	2597740	730052	1961615000	174906150	1190495	156102900	2990.74	9598.53	335174	267266	72012.6	86247	34142.5	11939.6	11502.9	23956	94063.3	92621.7	23430.8	35711.7	60448.6	162744	72404.4	43543.6	322401	14040	46265.4	35710.9	106122	17826.4	45687.3
Ruminococcus_D	1491715863	33681600	131938303	28297000	89647500	705536550	266125799	1135491170	1227059017	19159.1	197888	53650200	2454950	239946	797969	360117	303972	124184	185858	1997480	1099010	1272740	1443650	1671730	129832	946243	255443	328163	78561.3	530833	494288	1461010	169724	597610
Epilithonimonas	1474344950	29319645	63588660	93264536	253274625	754030900	358926875	1870793410	534846600	35376.9	84182	36712815	916350	393861	566003	306311	237174	253482	268188	489085	853882	258523	503282	550197	81641.5	645435	310141	842830	99380.2	360928	362156	801160	146480	420574
Copromorpha	1471054160	42375500	73077362	44521946	36729200	624337620	148978824	412934934	524048710	19448.4	85598.3	13204100	1652240	147830	633173	134715	145025	53317.6	109939	685306	528058	586940	587969	506061	58346.4	792322	156900	435779	17825.7	297542	261795	987249	74067.5	356786
Sphingomonas	1470599215	94537900	79767100	27218500	40017500	23505167150	2636668440	179189000	3079967952	7550590	627329	20377900	18486100	4664750	4965840	1705290	1018610	1088670	1459600	4598180	4388080	1146230	1897700	3106740	1990500	6611280	3104170	12789500	2550980	2203030	1695800	4539800	1184330	1976710
Petrimonas	1460588700	4560590	8956890	5740930	13038300	470861460	20539120	42321582	180988200	3618.69	13420	1771750	135844	69897.4	142675	25097.1	48936.5	48492	41752.9	120859	196264	118738	105895	99246.4	28752.5	133460	97082.4	126730	9694.65	131950	53486.1	232065	16438.1	120949
DUPH01	1456485000	10046701	12939507	18389356	9132625	611697400	25172160	29872357	59339716	798.612	5843.51	1424170	130235	71166.1	24833.4	33880.2	8391.78	15817.3	6865.3	70070.7	30401.4	13751	25714.9	22599.1	5842.89	197092	156499	967280	21309.7	23671.5	19032.4	58134.4	11235	26619.5
UBA6024	1454179000	131799310	24558353	10289281	49242170	1050037400	73842000	57849660	354096800	2146.97	19800	2175950	417541	226131	292733	115855	79463.6	64620.6	80584.4	158010	480539	176621	183746	555482	63502.7	310893	339129	1520340	69382.7	172481	130766	327762	56779.1	130558
UBA4372	1450271555	18275300	37164600	19830100	19746700	2324333570	319397932	252643927	1160311768	15908.9	109970	6303540	1657060	585320	2155970	1369320	482623	619907	976784	2128750	3084500	831378	1536470	2007680	209981	2259540	798965	669093	51002.6	1542730	1230510	3499580	584190	1330900
Alloprevotella	1432353600	15748300	39568828	21503100	33627400	1896368910	237901587	247005138	1072527617	5669.67	73686	9919950	1343790	386707	1209170	453917	266698	528145	723725	1504840	1562020	562253	908471	908868	137502	1669780	546563	733884	146632	944636	647823	1525880	268415	1037240
UBA8515	1430808200	236489340	25750548	8233630	26978189	7227432000	256329660	72748790	4021727700	/	92650.4	8020533	6054270	6619930	531802	200230	90790.3	95788.7	58268.5	1071780	643377	335444	702741	332004	1428740	10621235	2148230	2699170	141126	377157	229353	982848	152175	409188
Corynebacterium	1418972612	158458000	159141000	165283000	58453200	16151034700	2814461123	1688685142	3993670960	59264.3	480779	17993900	12757300	847341	4146350	1225250	1139480	404373	712380	6473790	4733890	4259460	3752300	5994030	800299	5086680	969327	1664830	122926	1819150	1787680	5496060	795470	2109070
WARW01	1416483300	11786500	33848884	5584900	3173518	/	27223420	71269980	325814100	1517.52	28417.4	17335518	436513	153493	127463	30828.8	22960.3	59402.9	16112.5	173026	161526	51168.8	137562	119897	24979.9	587549	98151	316989	17100.5	46631.9	43730.9	181351	31353.9	44667.9
Methanobacterium_C	1409065240	2071080	4328187	6235268	1968530	14198500	60198710	19887210	208207370	3306.81	12431.9	1289496	80749.6	11228.6	77980.3	41552.1	7511.32	2166.6	13476.5	99146.7	93314.3	61335.8	90587.8	179462	14957.1	115988	24538	21385.3	1221.82	55683.3	33847.3	145695	12330.2	35087.3
JAAZME01	1405550000	3493150	35911100	14327100	25617100	118723000	9425540	428877000	87564400	4664.94	10675	3085850	213696	6912.6	19360.6	13860.4	13133.6	5636.02	27403.1	14843.4	3327.42	172996	28900.8	61357.2	5430.7	21214.2	11876.6	18534.7	433.177	17747.6	7485.82	19696.4	2223.61	19935.5
Bilifractor	1397351580	14699070	33057822	32339140	35023100	405870600	115642280	315831980	375843100	2980.16	41550.3	4986690	1000870	77887.3	174317	108893	70023.1	14300.7	47949.3	508553	371051	340565	372310	348204	64686.3	353583	52688.3	275814	8034.68	144475	130128	476047	52287.6	142889
JAFIHQ01	1348680000	1760640	657403	1927300	2908680	56827200	2194540	2724280	2860460	/	3087.19	352440	11400.8	6093.33	3020.5	2712.91	/	4939.33	/	20248.3	17680.2	/	14342.8	12807.4	569.916	35796.8	26101.5	921264	3041.35	13635.8	18657.5	47898.2	4825.32	6689.2
CAG_1000	1341604400	43158847	152695980	28365041	28778844	1317308000	231400760	529124630	2985875900	5159.98	152606	24597400	2426180	268740	978327	526027	416630	104015	162261	2024890	977612	1830100	2074460	2188930	172760	1673800	271303	440271	16890.8	596942	507505	1504160	258941	857598
Acidaminococcus	1334304940	10174990	26759070	21389300	63866800	99716400	73961419	104396082	169240170	3410.57	48468	12460000	876974	58938.6	90660.4	59721.1	66927.9	18265.1	48327.3	167393	272491	237304	253178	420050	22790.2	174162	27152.5	67431.6	19027.2	82910.1	113104	433706	46216	112776
UBA5026	1328560620	40806910	445615080	54468800	34618100	822628500	184628450	1193835030	2315511640	641.76	163243	72512606	1808720	204678	634252	306872	533114	99686.1	148397	1984000	766929	1460610	1622460	1428770	119641	910709	273666	270400	15515.1	499454	392549	1005490	165546	770106
Nanosyncoccus	1324602093	74509400	105856695	36724500	36054000	7366129500	878726760	587459846	3088873770	25356.3	259020	28830967	6883390	1251230	1435590	1124700	727828	405705	981888	2738830	2791970	2406460	2898700	2924130	357472	6977500	1737290	1247860	91623.7	1599750	1312370	4083880	360984	1970740
Sodaliphilus	1322874689	13232300	29053100	17358600	19323200	2642882300	302181112	115976000	1102217725	7117.63	95423.9	4812450	1589170	517606	1665210	734484	307727	518323	584470	1583430	2702970	653865	1477290	1305420	141667	2603800	736665	439146	37885	1316030	1459280	2883950	607764	1078940
Pygmaiobacter	1319937900	7453025	20027580	13581149	10575570	47829400	11160718	77609330	146212080	3272.36	8335.7	1098649	148326	16760.4	11790.9	10735	27345	6744.95	12454.9	96888.6	122636	32507.8	32813.4	66496.5	10206.8	191912	13902.4	103198	3867.8	13295.2	28442.4	79463.5	16677.6	16128.7
Sphingobium	1316245100	40100700	44842100	34748400	29601500	8235809630	710160300	137968925	3294000371	490020	198971	41101800	154617000	1317410	1258160	442522	327716	373097	438539	1356490	1169880	285465	566919	916223	843314	2293990	1410150	4182300	508993	758771	561878	1706250	322583	722246
UBA4951	1316193000	50426212	51173775	484551780	80797698	199880710	96610320	1752826270	652911900	11173.3	32200.9	7716690	2772840	398130	327779	90899.7	137669	20431.6	73521.9	656113	341068	595634	469194	506063	41395.7	519494	67106.4	141484	7601.86	182136	201844	606596	74376.9	264686
RF16	1306374449	29471600	69906600	21866800	31318600	3590083270	412856781	212619150	1517707376	15229.3	172423	8691750	2958500	744599	3025900	1552740	712801	956146	1229810	2516400	7245520	1508160	2801920	5537880	314355	3544700	999294	1005250	81629.3	2709660	2022720	4583730	1029330	2990890
SR_FBR_E99	1302427000	23530837	9999403	11611702	19970600	2342270300	132914030	63630020	149429013	10203.9	23145	1452430	362556	99077.1	235221	89392	49615.3	166339	61311.4	340343	249248	90498.3	234644	132094	26241.9	1275930	225472	144670	14279.7	136132	102622	369236	62231.6	118229
Sediminibacterium	1276893999	127464000	35119100	17232600	25205800	10968634100	928148376	139349000	2674214210	4560060	151945	14968700	6338650	10533700	10713500	16025300	5761240	10634100	8967770	12647900	17208200	7249740	6181350	10042600	3708590	5793710	13554600	4092800	3517660	10926100	7402330	10736000	3293840	13631600
UBA2862	1274965200	17573300	18746900	22275834	18542500	1367583960	228987440	115963911	487926500	6153.36	47938.9	2476740	830812	138938	333718	117139	162134	50218.7	101159	447684	506858	426089	540504	656196	66879.3	761909	144921	286212	8021.81	239349	227786	746640	85672.2	260994
Demequina	1272362650	47158600	83280900	242565008	21700900	4224802500	753501760	438685678	654663811	14931.1	138209	7451990	2183910	327361	418222	184946	195218	304386	127582	750761	592328	761830	625921	1271460	188161	1026230	166827	668246	55545.8	333028	395499	811806	194530	452755
REEB76	1270586000	4299937700	7968354	11534948	/	547019100	24032001000	34538530	143848700	5728.14	195725	5458131	289631	14702.1	68477	6373.3	5169.08	11559.8	758.436	21935	24713.2	18262.6	10961	27693.1	2953.6	43395.9	10057.8	21644.5	851.593	12266.9	11339.2	23433.5	4025.48	6812.67
GN02_872	1268405600	28592090	728398400	46854700	132232843	63935600	41105640	1350274200	506829100	12034.8	175036	146434250	598376	271435	196088	54304.4	118489	28578.5	86218.3	85430.3	252602	179888	673527	296670	61431.4	1448030	198724	336082	34442.5	93793	82179.1	216840	62269.9	147382
Roseomonas_B	1257425530	29301364	11578200	16576700	20434000	4064873500	316098500	73188467	301618180	32258.2	35942.6	5566050	827599	187020	400265	111987	56917.3	76841.1	92888.3	486930	442001	118736	190150	290503	371883	313708	345189	889969	115831	220027	187343	506281	83137.8	186963
Hydrogenophaga	1257316830	151315139	23557030	48186773	369532790	7369717600	559836080	121448940	1926008920	1404420	103564	13614300	37238496	2975010	1322400	430773	168552	482405	427336	2267420	1202000	232041	511302	753724	1341930	4045390	2538410	5093720	2185670	596112	390740	1407420	281824	618073
Mesorhizobium	1249811428	116246217	25955900	20442200	47805400	19844413570	2438798180	120925000	3019162030	360428	180236	12737200	7926760	3471160	3658550	1005130	509630	706187	777164	3097670	1893960	556468	933783	1429850	720094	4887630	1369400	3386090	491947	1121800	787365	2406910	469071	1202830
UBA5066	1227344600	27349703	1098310	8538450	11194289	936513600	117956650	13300400	49909257	899.615	9218.59	437630	126172	42755.5	79483	27340	11488.2	5254.69	57916.5	104553	76233.2	21683.7	28357.2	54729	29771.4	34863.7	144124	379707	21260.5	51218.5	37890	75091	19433.4	25614.9
Methanobrevibacter_A	1223332334	26119300	86802500	23879800	22310000	724060850	219585559	453199574	2933172940	14375.3	160561	23355400	1843910	586985	1473890	820746	483822	235189	484212	2408030	1624130	1501930	2070460	2294260	223891	1155390	726844	437219	26187.8	1149930	852103	2742760	350436	1222750
Avigastranaerophilus	1200683100	6631942	14217302	3180859	11170167	59127300	34410555	41143550	386542180	1401.18	24918.9	4410382	237245	148250	438102	63086.2	155967	200702	78532.5	285249	553951	194265	345239	238957	36032.2	258829	191583	252311	11764.4	298923	190528	512662	74974.5	256340
CAG_302	1197821610	12173070	116376700	26113567	30858160	168943800	150134197	1016218200	1027403700	16433.8	83032.9	29510225	1012670	81236.8	454399	133007	1126540	529571	32452.9	665137	480308	617819	899621	906920	64559.6	247180	121830	93897.5	9189.3	261688	240992	614467	117529	339731
UBA1067	1190304700	13524900	11160700	15490700	7886900	1207637480	159266720	26121300	518426727	3668.41	44181.8	1918810	503085	294776	497238	409928	96142.3	187800	188728	538501	1033220	246177	513308	633956	81995.7	576490	219665	507095	18096.2	484312	420195	1389060	174895	390387
Nocardioides	1190008484	289189763	232749000	117399000	146905000	91449277900	5676007000	1790901070	12270416300	1908000	1370500	127745000	82158800	2250600	7927790	1633390	1467690	590346	1044490	9433200	4441260	5229330	4282850	6024920	2659660	14721500	1905730	12171900	2305160	4726520	2004530	5536320	16642500	5310950
Gordonia	1186476360	91826302	400374673	117500000	57554000	15784772800	1542846900	1569025860	1904633280	389742	6291110	41077800	201144000	311603	942613	343232	259829	121245	178536	1587050	1004630	941758	926998	2449620	433374	4916480	328965	1258180	152507	460873	468902	1456600	257208	521940
Allorhizobium	1176964740	22856300	19328900	19692100	28930500	2877190840	400301860	81351300	718612454	44317.2	81857.6	10870200	9930300	1597500	946531	281747	220015	267133	265359	1209440	951727	211148	475616	513174	249961	1613360	544011	1311480	241130	507982	337035	1108950	190589	456710
Clostridium_B	1168758900	16673330	80118070	12880217	5552440	293127140	237090310	245802900	1097283000	1357.58	58536.8	7156239	632834	128791	472546	128307	240191	65820	85216.2	483878	2009130	922955	964075	1077940	80306.4	421496	224322	151471	9578.19	272707	212641	619939	105359	481228
DTU024	1168553630	9836020	24036228	13867757	25472400	761127500	95252330	187018030	162858040	599.701	31091.6	1454180	299947	37323.2	51410.6	38154.1	41823.2	23753.4	18922.8	880615	142949	178101	181833	185524	27038.7	201582	59859.6	124158	9598.46	86838.7	99803.9	313991	40415.4	91028
Caecibacter	1168071080	5821970	8947455	6535903	26830196	86786360	11829712	34113370	69412730	24636.1	12690.7	4992284	133382	18270.1	81525.6	12347.5	10720.4	4133.64	11958.1	57537.7	66997.6	84204.2	112851	75042.4	12769.8	42699.3	14892.5	12989.7	11830.8	39080.5	34189	174844	10837.1	24241.1
Dorea_A	1163556400	8755045	124391890	23449896	139709613	71366700	35390310	2581496040	252733240	21382	194193	72959650	307466	26768	47781.1	14355.9	11318.4	18025.9	22044.3	57500.2	108206	120335	217468	110516	5739.63	275528	9553.94	61538	91209.6	28566.6	32400.1	82075.2	21896.9	54484.6
Lacrimispora	1160307830	22642700	130263821	32382686	38813500	888308170	143721871	672401790	1138457362	8065.88	76505.1	10712300	1370520	176568	695353	165355	258541	68402.6	126920	1110770	602145	801140	793921	718475	94618.4	836482	178793	585233	21084.4	350107	265969	881182	129211	336693
CTSoil_072	1158566460	7658460	2332011	2221538	6397490	/	12772230	11130510	40482500	278.239	9141.28	299810	60210.4	13673.7	20067.3	8193.66	11514.4	/	12645.4	23009.8	27468.9	53563.3	31636.6	57628.7	5724.48	43000.2	9986.15	24327.5	610.478	9724.22	7783.56	34691.6	6450.68	28822.6
Amniculibacterium	1156629000	60178270	10147500	32661750	96289390	1378060400	46421800	138635302	1140745700	3027.05	30047.7	9782840	371111	199773	66186.6	58051.6	15362.8	7485.18	24566.4	120924	89806.4	45521.9	97948.9	86292.2	46888.8	352968	128228	174905	37895.4	42725.2	72261.3	140781	16875.2	55822.4
Phil12	1148497500	3485455	13720120	4466130	10048815	242955900	32383620	51441209	186421690	1160.71	14941.3	4541770	355705	95118.4	477396	115568	167996	247183	91369	338070	542144	188020	247295	352793	44716.4	377747	180527	117178	12688.8	459675	217813	419740	85053.5	413224
Cellulomonas	1134604660	205710608	82004093	84910258	46814600	27014789300	3097552400	624036260	3839913800	107976	341283	10683400	12398100	633004	2525360	734098	810904	238154	430293	3111610	2186300	2050390	1922240	3200560	846085	2621600	500068	3471100	221215	915677	985538	2358200	634427	1098860
Proteocatella	1128877760	111071452	405837600	94475950	34722900	216481000	31168200	3056564200	229582000	13586.5	30942.8	27432300	371438	18613.7	115809	1470.33	17016.8	4138.07	2646.16	103421	29943.8	66164.9	115130	101657	11291.4	80701.8	59898.7	248563	23645.6	20390	33703.6	91637.5	15346.1	54718.4
Parasutterella	1128256030	3078634	25603862	9311156	17355900	92727270	20534175	63349870	31443899	9116.09	37113.8	34158976	92780.9	30978.4	142517	62730.6	54685.4	39052.1	72372.9	225944	211052	44940.8	102357	88660.4	27329.1	427301	95480.1	84221.2	14588.3	64924.5	55460.8	149510	32378.8	91724.4
CAG_177	1124134470	36073100	141730502	36475138	82807800	885735100	264703081	1502231639	1333435970	9661.86	144356	22010600	2901080	161785	507472	196662	209256	119617	198400	729462	839212	1277100	1161140	1237990	138320	878271	144540	332444	52976.9	554008	521775	1875950	157665	501568
Clostridium_J	1109987400	24861270	99535830	15727693	10233626	501445400	439546940	526924800	2170363300	1799.91	102714	13458251	1907400	157784	849766	228802	338667	189044	211331	1104300	753055	949202	1124670	1123150	133572	580260	241068	220406	11469.7	293360	320138	856109	125169	464896
Evtepia	1102019550	14207900	35076800	23034422	59898404	431739090	104174520	142592960	222660970	5227.85	88542.5	18765117	414063	76205.9	255692	51440.8	41781.1	21397	42948.4	296735	294429	372901	282471	217283	32994.9	426481	47827.7	364809	26638.4	133049	99302.2	417533	45150.4	85211
Rhizobium	1080002269	71975100	23268300	19030900	30723200	11597971350	1568256840	110569000	1668924172	288345	151724	11300600	3856230	3319790	2714190	878624	478506	699751	665998	2363000	1981430	519217	985249	1328700	537270	3054740	1140840	2674520	348478	1111540	829560	2780310	444368	1095890
F23_B02	1074497700	11992700	30281700	57645844	14457931	420579000	94347595	325630620	156320000	486.118	29825.3	5689435	511188	45474.6	42932.7	20731	13955.5	26474.1	37839.7	230888	130446	159781	193682	327970	31793.7	126763	49384.3	91492.5	8328.65	116425	110992	330858	38524.2	101137
UBA3282	1072689296	30084961	104253855	24439300	39336600	546896440	241902237	424336123	1277248043	8247.2	106067	10569800	2735250	178390	620815	225489	275241	112774	158912	1199320	678143	847239	1174110	1402130	131840	866600	307827	292651	12037.2	504090	353739	1373950	157431	577023
Nanosynbacter	1070235472	12322000	75259493	33994900	51663500	2690750700	93128404	1152086100	862697280	20198	136822	65954500	3897450	643908	295081	201809	24182.2	43283.1	37851.3	91109.9	273834	320644	292149	276042	45525.1	1556340	152352	284855	34124.2	198555	129751	708287	48273.7	187715
Rubrivivax	1069024210	176349920	19905804	28772226	60367205	468336107000	1610012700	91512327	24557983710	825842	203100	7867390	17300400	5802220	1853650	721191	328730	385769	606458	4391870	1536080	427338	716144	1148310	5017790	7818670	4077840	11388800	2338130	763568	508469	1518350	329050	691902
Romboutsia	1068781630	20336400	86233380	20978038	49527937	638877100	1638771130	1685850700	1257361100	11970.6	336527	12676647	1381160	134535	299015	174384	91247.1	59460.2	63467.6	792995	163705	211289	407451	200466	268075	1297390	95699.6	183948	23431.8	88478.6	108258	196201	49508.4	128437
Lawsonibacter	1068391510	21097500	63762405	27257000	66898600	752091000	201496262	468489700	665364890	8280.12	88375.5	25789500	884648	113517	262519	122947	379742	49391.7	97605.9	686122	837689	633518	647891	1431000	96029.2	867207	129183	378491	32361.7	302282	203029	832645	102596	250579
Agathobaculum	1068082560	11897404	42459846	17754210	83926600	362347400	100040851	233907830	149541270	11596.6	53724.1	20221645	312760	44573.4	166568	140881	51748.4	21478.5	80863.5	609031	148876	419394	277908	419558	18728.2	223634	50119.4	147416	24426.4	77377.5	59010	326620	27543.1	89371.8
CAG_492	1065359400	26837126	129212630	25458758	103180400	220563600	196763350	947552300	1968870500	15446	100216	23511330	2612780	236371	733477	291255	340779	114612	162893	1369520	719097	1301110	1467430	1287670	115927	1095040	200419	217736	10096.2	483395	376127	988168	161853	723378
DTU089	1058876060	19450284	72422302	23318200	19838700	305096850	177400141	356678049	707471410	4825.35	58646	7153660	1027990	112273	519624	133773	302158	107194	106766	579368	573259	934369	863734	1428070	61555	446441	181854	217712	6849.53	396463	279495	830879	98191.7	321206
Anaerotignum	1056536760	15613500	95878756	26635533	39066174	193235870	96235040	572919810	528940270	7603.85	71821.3	26403200	1013220	109083	363582	168203	168586	51385.9	87609.8	693973	402816	664150	649232	744588	43340.9	418025	90813.5	217659	10515.7	221068	215682	669611	70350.1	213022
Bariatricus	1056370500	8486850	88719230	22360732	92319700	109747500	54280285	864837820	319202590	10347.5	104699	31627100	310799	37585.2	117117	9370.26	27551.7	17483.4	16966.9	156157	161783	168798	172938	193857	35052.2	209049	37644.8	98634.2	50270.8	84900.1	56492.7	200962	23238.4	95741.1
Lenti_01	1051370800	13060938	60519630	35469150	12195587	1085320900	56466100	172339100	100862040	6112.07	24425.6	10128531	85976.1	54269.6	64027.4	56317.1	6695.57	55494.8	29721	133028	196512	13583.5	52947.1	59269.1	10821.8	559421	163317	824057	15306.8	48383.9	57404.6	157448	22068.6	60260.6
UBA1547	1027794300	23013221	31814523	13660700	11006600	2820165900	142386303	252672000	904485970	3948.67	50719.4	19027470	2790830	625728	326350	135567	40744.2	33423.7	89881.8	475661	364876	233888	283153	570788	93688.4	1668820	211526	517023	34735.6	183242	128704	470101	73419.3	169096
Faecalimonas	1022539230	16391657	128641140	22563300	95553100	87020680	76983809	790589400	630519450	10076	113095	36770077	694801	102622	374833	150625	157945	121525	98375	487613	536100	660668	652072	498367	35634	478254	104692	359361	42138.3	231091	169889	516594	102437	306514
Clostridium_AM	1016908600	14742890	40858910	7901692	6865706	128856680	154710170	160313780	761653800	3041.74	39950.7	5617229	549535	88222.2	291862	188025	121830	40716.9	60688.8	356573	274520	593210	452018	530139	72855.1	243922	78675.2	145807	6680.28	129561	128554	389186	63953.9	163716
Thiopseudomonas	1016774140	2430210	15443317	5474093	2331367	220765200	19666480	23318154	62169680	2867.95	8856.81	4459311	123991	33245.9	186758	82836.2	102885	135915	130555	135004	110124	59010.6	46352.6	184084	17436.1	182434	77157.4	83937.7	3626.56	83278.1	71090.7	158954	62365.4	160996
Sedimentibacter	1003536370	27240989	184802690	34032281	28794600	337290000	167204700	521782190	1707278900	8120.08	100027	34464000	1899810	271783	810620	176695	278242	116088	129299	1430630	882766	985572	1113380	1224450	111039	650983	236402	239383	10521	465882	353652	1249273	139238	528271
RXIW01	999070000	6435090	2524600	6565970	4254980	2007940000	52554600	9323570	91382200	6252.05	19858.6	1264880	9067.99	15963.3	4437.07	5485.31	849.148	1273.29	1070.25	3221.82	10560.6	3419.42	8104.65	15662.2	2019.79	245321	16303.8	18187.3	866.064	6934.32	1879.27	17883.9	1658.19	11558.1
Clostridium_AD	996114700	23873053	78047790	15639125	8848288	317466870	260813330	306292310	1551665100	2938.06	76377.1	10098572	1420620	147705	566030	258101	338324	63444.7	127829	1232970	420499	937675	840989	970500	83894.6	643803	238306	175399	7746.18	284746	256846	641582	99999.2	342382
Accumulibacter	977230700	79096230	15812038	28737848	51342702	6314231200	324810950	75640440	1736121450	67087.2	42967	5849360	1331430	713331	568429	224952	125321	86767.4	174809	861152	410708	117117	293271	339330	171301	1899120	347523	1096790	89711.7	276650	158662	633680	105851	253419
Anaerovibrio	973747500	16270382	17999796	9908251	9567280	89372700	52619874	181696180	330399670	5137.48	61376.1	7975043	764689	53155.7	117624	41879.2	55324.5	16014.4	52417.5	366831	206613	325056	296345	442376	27282.5	229027	49876.1	179660	2717.53	148383	108287	340970	60730.7	185234
CAG_485	966781900	16025700	30345200	14148200	15728000	1708163550	242733387	135867453	795431747	10590.4	81816.4	5152900	1406670	415442	1553210	599236	384857	518612	617571	1708350	3545560	871424	1649980	1965780	138354	2276670	680208	551076	43695.7	1564210	1001930	2532990	440203	1222150
Paenirhodobacter	965069560	4199044	19753267	12264627	16174639	333008600	33420860	121899990	53958780	9346.23	55725.6	22819738	223306	92742.9	204645	53901.4	13470.8	25618.8	64871.1	125835	80077.6	25328.3	54380.9	60385.4	26578.2	549314	61736.3	81019.4	12417	46072.5	31763.6	160616	16613.9	76833.9
Paraprevotella	959031000	5454480	19178688	11705602	28847067	348281260	66357562	138611440	103635410	5310.76	33359.9	12211400	414406	89948.2	132856	118701	55799.1	53331.8	109291	330675	272006	102222	199499	190866	28541.4	305307	102993	162453	27870.7	174822	101041	344851	52482.4	199951
Eubacterium_Q	958604683	30430169	140386653	27235000	85742700	621220870	265675109	472136770	2189919750	13933.5	147468	11506700	2252070	323033	761428	320492	349785	136343	184437	2608480	1239590	1684750	1632290	2389700	167800	1405600	255747	335311	15954.7	615959	533584	1839190	210610	765871
UBA12078	955738700	7793920	8395843	1221853	1868616	125253000	33867590	49714300	144289160	/	15833.5	986733	373394	105091	86033.7	23293.1	23473.7	21507.5	/	7086.4	144706	136716	127584	195925	25319.9	306785	28748.9	99854.7	2423.32	53696.1	53966.3	249229	35691.3	66316.5
Phenylobacterium	949964485	53016997	14455600	35529800	51224100	5364538610	682711240	131228410	1270039315	3316740	99210.6	7780610	2999840	2516530	1393770	462870	232290	268295	325013	1171460	1157470	287154	513782	876336	810407	1583400	1119190	3430580	553328	561203	435438	1249580	291134	602052
Nocardia	949894498	260643000	77985900	47871100	26697300	30867319260	5066572950	522699943	6089784190	86204	518504	11585400	23426600	816284	2859910	791463	713554	275584	526991	5152770	2693900	2208380	2245920	4217800	850726	6136490	640476	2320590	154093	1082420	1123200	3128780	609154	1357830
Sulfurimonas	944957750	28656100	1137585490	201089391	45805000	827282280	145009941	917145620	1399932050	73173.3	447119	375659206	1902510	554772	1472700	942132	350278	462527	775811	1997060	1635030	799729	1331060	1874690	129052	25552000	1658270	1020420	58442.7	1176310	862278	2257220	349894	1057830
UBA1213	942314430	30145200	103205000	24760700	24795200	613131420	314271045	416795058	1579090440	2758.81	93167.5	8780650	2017630	184246	803258	494187	490926	192420	203398	1246120	1147610	1639450	1459130	1774140	158186	927300	245778	354425	16096.7	737965	589361	1624230	195500	867760
UBA3789	940304770	50686082	216547390	42410744	23032400	833369600	293173969	633623320	4529127650	14972.7	229236	38852221	4065347	391299	1364030	858302	751084	233178	563438	3271120	1630790	2984050	2912430	2694780	289026	1856521	430312	460709	19902.3	1103560	999856	2297030	337535	1192060
LD21	934330060	100039280	33798623	10246786	22464300	2079120470	385556380	87027884	976179520	5483.95	54643.9	4396910	1463650	1421290	944436	379874	239624	329775	322061	1108910	1228830	468340	740056	904224	146281	1116420	681824	655159	67783.2	752355	468746	1240610	228365	624248
UBA1221	929519800	3491790	8948180	2446190	4142200	37790800	11233554	22387337	202928600	/	11108.8	1196640	128778	64677.3	208284	75736	52827.5	111493	45026.9	140655	1919020	112063	202632	163132	19636.2	410316	118192	130774	4702.64	200963	108596	260189	71173.9	136899
Fibrobacter	929106699	28706379	114042000	65114000	37843200	425656030	132855148	195855540	398561674	6153.92	72256.4	48969500	987374	270151	681417	263195	159858	145398	237421	580913	1029580	1047480	820222	1389200	83841.4	613889	231345	324995	14292.9	430715	366983	1047730	156625	353995
Methanobrevibacter_C	922847300	6462995	11690672	3798731	6321424	222988300	40130320	39689592	280331900	656.506	24176.1	3023780	210599	76881.9	162854	38966.2	86689.7	49552.3	56758.7	290041	136008	199743	336931	345139	28343.6	119612	133689	72696.7	3102.94	227707	127283	280707	59649	138046
Odoribacter	920502100	6189030	34207452	14589286	29219221	339695530	57462512	88465560	324384670	10318.5	37681.7	23606200	480531	106222	291178	143447	109082	179863	119579	320814	470225	150466	303782	318878	49692.6	472217	137701	244680	45648.4	195024	191708	668473	80852.5	248900
JAEUJG01	918014000	38470900	301543	890052	4417960	212304000	19516200	2604300	7467990	417.017	3240.32	180401	14563.6	70535.5	12925.6	3753	/	/	3079.3	1003.46	17136.9	6326.7	9027.62	7212.88	4140.47	22839.8	18984.5	82023.2	6582.36	12886.7	8123.34	31043.3	1564.74	3739.26
Methanosphaera	916502940	10639312	32129600	10126900	6375760	246813610	108028558	164192580	1300938360	2104.28	61981.4	7227060	789453	118940	598340	196852	235338	86021	183963	682104	780222	459912	670789	740794	72196.2	401649	176956	157596	3309.83	430676	296553	1064600	110763	390961
Microvirga	916217300	17349329	5859690	6053500	4905390	3928349900	456561010	21459300	496386800	21233.7	50997.5	1601310	1428130	266194	1020980	227910	167124	198706	194933	805506	563344	167055	298890	474259	211029	685081	364594	828618	109646	362974	244934	781084	118210	328597
Fusobacterium_A	911578100	7953473	82780050	25477462	37559973	111101470	54776750	1511126150	369941870	7290.3	69220.3	56509693	396038	222195	347819	215807	87884.3	140373	134492	721163	605038	162557	528057	423417	46396.7	520709	300358	257788	24912	368401	279004	680554	119411	359678
UBA7709	907422000	13838900	12222800	4853490	4077260	9333860	29338900	56519600	31539700	2736.28	5916.08	736192	84161.5	5935.28	6057.9	/	7509.2	/	766.481	27715.4	14152.2	28056.5	10259.9	37130.5	915.291	11244.4	19393.4	164349	3188.7	4790.17	7171.57	17933.2	4191.61	16489
Saccharimonas	901365621	22207300	49274193	23841500	53799127	2603711900	116562039	589274370	972428380	37581.1	104184	30204400	3341580	907997	85043.2	98853.5	56907.9	114690	90977.8	120251	832813	140462	461291	78752.9	68453	2436930	172177	705172	34511	227480	120985	365569	55514.3	181856
Ruminococcus_C	898025170	14763300	81325729	11792700	112391622	385774900	143687530	460444400	363960700	11585.8	73338.4	21426300	737144	77942.9	304898	109348	77039	55078.7	66602.1	732625	308353	491338	466799	591326	78121.9	513101	107442	143405	164333	260206	173399	456279	55555.4	248526
Desulforegula	892519000	9391760	62611300	28797000	35174900	130272000	5806320	23137300	52739400	2945.53	4473.03	1328360	283260	39357.3	57551.2	8026.99	1458.35	6067.96	6123.39	12045.1	43846.8	15548	26829.7	19057.4	4051.73	55989.2	53972.7	962901	2087.85	24656.3	9276.3	39352.7	4716.09	13583.2
UBA5070	891888700	142437130	1778900	2340993	14350408	2419810000	31677393	4543451	62631400	2991.75	2598.5	335621	156101	3299680	10968.1	8456.51	6931.15	5805.51	1240.08	31866.4	36508.5	29227.5	36028.7	25631.7	45516.9	137857	30838.8	290152	15947.4	18740.1	19598	66500.3	4641.38	18368.5
Clostridium_Q	888566070	7075537	82831890	21043680	58104126	86315210	35179267	171399120	300279210	14080.5	78177.1	54891382	462187	38210.1	156524	56631.9	71753.4	22278	26864.5	297870	160990	292937	218382	191181	28933.7	236824	67205.5	119030	30175	131647	93024.1	279470	42864.2	157210
JAAVLZ01	885637000	2148650	4212570	14178500	9478120	/	4013550	62318500	18393600	/	3833.06	1244820	31060.9	7792.7	21121.1	/	1197.39	/	1277.8	15963	3182.54	40186.4	5586.82	18524.6	2131.33	19974.3	525.42	29894.9	639.421	9650.12	3183.09	25593.7	2541.6	12937
Palsa_739	884094480	5300051000	10403463	17700404	577497	793450700	33284701000	71194239	112759500	30692.7	7114590	6676270	830141	39073.2	145317	47701	11187.9	1995.15	35033.3	104038	139208	102210	130828	41124	144769	54311.3	100066	1469800	107429	101486	68292.8	194124	28759.9	120753
Azovibrio	881304110	21693458	6395020	21447106	13542943	465813700	30853940	23634826	199466670	4834.31	12910.7	1743450	228144	142185	101482	37412.5	10840.8	44783.4	19129	154814	125608	17648.4	53769.8	82280.8	21436.4	151523	84652.1	288576	12804.2	45729.1	31064	142856	17511.5	53623.4
Proteiniphilum	877975150	9415331	33718584	14832487	18597600	711452740	69542033	189282510	442058960	6104.97	26767.2	6459130	565607	146383	283588	110689	82729.9	173727	126721	337331	681638	146613	315666	253411	62240.2	708167	283182	261904	22796	260225	222164	560674	75058.2	303817
Mitsuokella	876071000	10085072	38876796	21909900	46060960	188871220	32616880	133361180	47942280	2834.75	40161.2	22996745	363214	14652.1	43294.5	26865.8	4399.43	11422.2	549.255	151946	67193.1	113747	112172	40680.1	5484.83	116907	11654.6	100941	17026.7	43305.9	36602.9	203801	8790.17	21208.6
Sphingopyxis	861362073	29483095	26526400	25717900	50749700	4157287550	528613440	355342480	826123019	308610	102260	16265800	14428800	2140000	1600010	486180	614074	412686	332864	1386580	1982690	1035680	700656	902882	796961	2937240	1012430	1998330	4634150	2941890	547640	1513830	1775050	2827100
Bacteriovorax	854178600	216986400	14764991	3132307	34684181	172362250	42908020	18082171	164955359	393.892	13506.6	1497020	545731	1399690	393678	153310	58955.7	50836.6	66670.2	426624	420164	104980	165879	258926	109619	579611	538585	1017310	34938.6	261301	92262.5	317230	57175.3	109302
Pullichristensenella	850507800	11994165	11003637	18108808	14030865	472095300	107873960	96357210	82645053	2057.58	55035.9	2888700	368972	36879.9	60402.6	12944.9	17611.5	2412.38	14678.8	136068	102531	117512	123412	98013.9	16342	146151	36448.6	194015	5773.22	33312.3	43579.7	237185	16232.2	44277.1
CAG_95	848103620	18737006	130042262	25172500	32337700	492880870	213067304	475270990	1059491050	16167.4	118800	16477000	2469190	142588	544650	163678	226949	92422.5	129245	797693	657661	959395	946718	960331	85858.1	628095	161452	320988	15200.7	378523	295392	899610	127687	361403
Oligella	841396310	3146430	6183590	3702800	2256098	191506200	13475780	26002400	45671830	27678.8	7822.58	2340580	169995	52342.1	312360	45779.2	33725.8	21773.5	49714.7	113689	110255	36964.3	95238	71484	18453.1	449054	43563.3	109233	16115.6	98979.5	39602.6	95051.1	46157.1	84256.7
Thiomonas	840965540	26466431	10386754	27833614	21808690	1177049300	191019420	37052637	430878500	57055	41417.3	9759868	1983660	286776	327318	68637.8	35045.5	54311	63912.9	302242	197364	45509.1	123437	160568	97801.6	285511	171996	545853	67563.3	105448	79162.4	203789	47826	108224
Ruminiclostridium_E	840685430	21839500	90049102	20352400	33214000	466111970	234478607	424810778	818886390	10635.3	109718	13733700	1631260	228038	561770	329927	258880	101869	157683	1205920	710286	835448	1047020	1135660	89807.7	743524	177363	324140	22304.4	465326	365646	1335390	146141	375658
Megasphaera_A	840495000	11403800	4337030	3177650	9129260	77756800	17304900	45565000	42137800	3369.67	16701.8	2329780	57084.6	3945.9	50000.5	3686.41	5290.26	3278.56	1285.59	65543.9	29241.3	40442.1	39433.7	6644.82	3616.09	11103.5	1533.45	37846.1	/	16793.6	9685.96	39662.2	6098.55	13793.3
Faecalibacillus	840219700	15071991	113313870	30888655	81941971	173773600	101584680	994954860	464863100	23687.5	180885	81637228	421702	62883.1	104446	67303.1	86116.2	19053.8	32031	210422	215829	332221	366107	324216	20203.4	599396	71957.6	110004	28953	182082	115307	332481	45160.9	161056
Eubacterium_G	834090610	28929441	196319670	25023609	71143800	307912410	181629090	981600470	1008146060	9533.08	135366	36135859	1787180	159301	538060	277624	384255	116478	154763	774162	719277	1053906	1185630	871865	95164.8	763616	216678	221728	33110.2	441362	359629	1006650	138618	497866
Scrofimicrobium	833614400	1250403	89512950	53396350	12494319	373179700	25681090	839995628	116956280	1146.42	50367.7	13863800	253044	12502.3	35342.5	/	6655.24	9401.56	16721.5	93339	53125.8	77609.4	43349.6	76580.8	7452.34	190068	10202.8	39063.6	2945.2	20549.2	10102.6	50529	3106.66	48706.1
CAG_127	832134360	27522110	206759281	23642081	40872700	945983200	280457732	520467582	1323160980	5823.93	99605.3	22257900	1685960	165929	732576	514727	415289	100335	214495	1319770	1179430	1376470	1234980	2153110	115094	1046400	242573	290789	24707.6	619027	451950	1372220	230573	756423
RXIV01	821590700	2581300	2696580	2589136	17630607	1091091000	32527500	3436210	22226100	2292.88	8236.59	1610600	47729	23754.2	14372.6	22840.4	14750.6	11285.1	18532.3	19723.8	52326	25305.2	25807.2	29119.2	4666.13	191256	122070	35288.6	3189.29	12451.1	14911.4	36316.1	4200.7	9514.22
Pauljensenia	821075374	29942200	60565800	48540800	65619000	3522249400	456515659	1023579490	743427180	9952.87	110484	8995000	2197910	152226	570067	199197	135374	43041.4	121673	708340	761630	959981	620700	1164640	112854	813317	111191	292872	26261.1	334982	266263	736528	143958	305494
HGM04593	814335780	12883800	33080200	10671400	13692700	1746478060	107693667	158025962	537636543	5556.34	48305.7	5232830	1061170	233887	892488	303808	147413	316672	378316	829934	1278270	325884	774238	614272	111148	1045410	366209	373958	27122.2	836264	434527	1344380	204461	646760
Butyribacter	812201350	27645405	177812260	20309696	40613104	627570570	192474991	550438670	1526046620	1471.51	104435	18442300	1918370	151879	766082	337196	589669	137887	219155	1273280	721381	1166910	1124240	1297440	115175	849302	264549	259429	20858.7	415545	378764	1389460	228125	459684
Tener_01	808872800	21809140	11508659	3151350	4864138	116350000	13527970	73350100	229518600	/	11009.1	1409946	238719	20864.8	35647	19131.3	49274.5	14707.1	8494.66	19607.9	59768.2	143397	145399	126300	20484.1	137078	10227	56554	831.779	52308.5	46475.8	96264.1	16352	72742.7
Rifleibacterium	807294000	3367653	56626060	9770045	13859580	210829790	19207080	20109356	50442920	1837.66	9526.48	1377200	159045	17564.5	78481.3	37782.4	13255.1	22782.7	33329.3	142279	77028.2	61396.5	66190.8	105098	7698.34	331745	93816	178298	2770.81	43802.7	36385.9	100971	17425.6	40713
Psychrobacter	800288860	30346400	264038000	8361207280	188614000	3303479620	396107646	350603000	1485251893	121459	467106	82673100	3403170	681212	2199990	1069410	618680	1122070	1537070	2199240	3820330	1087550	1460880	2614690	226041	3234310	1295610	800024	64478.1	1412110	1131810	2993740	951411	1546830
CAG_793	799455900	11678674	46631910	8164120	37388950	423141500	107079444	165796520	660831120	3157.48	58571.6	9152005	672392	78084.9	318161	98807.4	369293	168462	111647	552412	465928	1130550	542222	524685	55859.4	306949	138963	75487.2	4498.96	209680	179454	516781	65442.3	277191
AWTP1_31	796674070	27700008	71051009	57034477	74346692	530786000	47187900	72308300	499634000	5388.01	25452	27898242	987339	891274	13313.6	25544.5	/	/	/	121606	45491.7	/	20031	/	28482	617947	166124	67968.3	14046.6	34441.5	6135.02	193780	2728.65	29684.9
Nitrosomonas	789951065	51121659	36084723	28599015	56229700	87128232990	325913224	90356300	8475847820	46254.5	71421.8	11559200	5059930	3272290	1895770	627363	288127	434042	564511	3446310	1664250	462008	1020100	1035660	966372	11833900	844077	1139700	149391	997967	606118	1910050	404511	979771
Copromonas	788854870	11987471	79756660	29419373	62043600	318440640	89244017	193114100	313770760	7721.31	73743.4	46848800	708871	62191.7	202931	94567.5	105534	21832.3	53994.2	384175	261177	325971	311086	621102	48251.7	273869	71169.4	246869	25137.7	125626	112575	509592	80305.2	180769
UBA5429	786043800	17588678	6486174	5986140	93672793	1319851600	38789689	22210135	200278940	609.829	11056.8	1383980	424363	129150	225754	66816.9	56639.8	59812.5	68210.1	181357	248928	104756	299847	143446	50961.9	207407	390186	861798	29180.4	111748	135301	379082	67827.9	138279
Aminicella	784022000	3066690	10518900	52424800	13297100	9659990	4478120	259638000	93213300	1256.79	15872.2	3244100	108318	28276.1	16011.2	1466.84	/	5372.99	/	34010.6	40640.7	20384.3	20574.2	16156.4	431.532	30412.3	8251.26	13406.4	/	14555.8	20944.4	48787.8	1528.32	13030.6
Trichococcus	780867920	4219668	17323577	21083000	419468589	304484940	23063501	109878410	320389530	/	38221.4	3905780	368737	72742.6	190139	65380.8	56035	21026.8	40682.3	360901	175266	161142	168660	196034	15584.6	261722	48798.9	97409.4	13628.6	60082.1	54302.1	330099	23824.5	116300
JAGOGN01	777495000	9409930	48037500	8438850	29325800	/	16598800	182748000	34214600	1945.25	25797.1	3366880	136723	298899	21885.3	12174.6	/	3696.34	/	120614	26045.8	19384.3	62836.5	85593	/	55811.9	3075.27	29226.5	1377.22	6867.75	5713.76	33587.4	1142.24	13697.7
UBA2883	773617400	3842640	6235882	2929438	5687890	190176010	29078741	30436546	212812900	1166.11	20732.3	3322023	176981	71013.4	212212	102459	44376.6	90083.3	97489.7	321498	315914	128648	225246	317797	28986.9	276486	138591	138883	7971.54	170592	161038	415792	74707.5	200406
Luteimonas	764615170	23352762	92459500	16436705	10768500	4836040600	530328700	81109570	825998750	25672.6	98547.5	14048500	6381880	404668	1168310	496997	121555	202741	309082	1052040	859498	224955	381152	621087	183723	1059030	315482	3811020	74555.7	381428	321268	771913	183798	388525
Competibacter_A	760560840	12076261	10678930	15441940	20390000	8826642200	234380680	30469172	314568310	11453.6	37108.3	7210628	197480	123930	172294	55355.7	29016.4	55926.1	48244.9	222867	143949	31359.8	102504	80623.6	31751.6	2861140	77253	183783	11235.7	123677	50143.8	229764	32701.9	141865
SCMT01	759873300	30046770	18767095	12915298	276600460	5750538700	150245440	87278530	421350780	13656.7	42165.3	14478279	65454060	644263	220487	90030.2	43620.9	93664.9	36933.7	183347	140502	51614.1	74868.3	67671	548955	524596	365242	768792	113089	87645.3	84235	165038	29658	80094.9
Faecimonas	752760276	24677795	182926553	39891893	30124443	108994700	125241300	733025610	1617524300	5900.71	53291.1	42847637	1873553	158498	455596	147533	224011	80078.5	98293.5	900523	527913	684330	609008	671781	52454.4	524969	137224	184545	11853.1	274601	234334	438199	121082	343132
UBA1740	748271057	48136800	65836200	23940300	13455400	1373071680	297517687	327432375	1148850490	8192.91	120223	7350680	2538760	270814	824181	435707	416194	126571	290331	1279710	1135800	1307310	1417720	1754930	176265	1042940	270668	422293	14023.5	538474	574018	1796390	234877	511862
Barnesiella	740620510	2374650	12399825	7815240	18254466	114653220	14766604	31794510	82202820	/	10248.1	9487330	122744	33440.5	95624.5	32193.4	36681.1	54655.2	41639.4	82157.1	92186.1	13158.6	58227.4	60899.2	13641.3	154029	53393.6	76959.7	39201.6	79552.4	46101.4	111664	12036.7	62652
Flaviflexus	740336884	2662470	18667784	12206500	13004600	242098500	60984690	252267970	204037132	2012.02	21314.2	4493540	198540	13549.4	47704.6	12343.3	24789.3	2511.51	9512.24	87988.1	107447	137758	73756.8	121227	11030.9	161971	9274.7	60235.1	2955.79	23622.4	42915.1	84800.1	16104.6	25708.3
CAG_41	736661170	7683120	61011538	10778400	36318300	319995500	84033580	620506870	346045940	2659.35	77781.3	20825500	304355	57265.6	159976	96399.3	129999	55230.9	30154.9	288905	206786	281455	360595	368458	16021.3	338091	170882	71724.4	18537.7	135611	69172.1	237590	47796.3	174689
CAJBLF01	736607270	9316457	11137892	8730013	21791663	450611000	50337890	31440533	164471840	/	17226.3	2329796	602683	119187	59537.3	78924.2	27865.6	9188.68	9912.07	185334	189253	171097	211743	301290	68902.8	262124	239999	245404	30459.4	131162	68788.4	263126	49958.2	125154
Aminidesulfovibrio	734796420	1252424	35058240	28539000	2996037	173873500	10748337	48922930	16216410	1020.59	6859.16	5116617	76433.6	22278.3	17342.4	10831.4	3988.2	5166.04	624.776	36012.1	45690.6	18230.3	30795.7	17586.9	3722.71	83581.5	22586.1	289668	3319.02	15632.5	19000	33661.6	13422.2	13899
UBA4644	730521800	5348020	13978700	6692030	4611750	181251030	55360140	41521850	67987820	580.548	18561.2	1213200	361590	34499.1	77394.7	14516.2	12732.7	5699	7147.53	288502	154090	97952.6	105075	219999	22179.3	132189	25984.2	56639.7	972.953	46839.7	57781.1	297769	15915.5	50661.2
JAGOJI01	727686000	1557490	1648870	5517990	19039700	89745700	6332180	25107900	14336500	509.646	3755.7	1474870	17062	27675.5	50087.2	14181.4	6169.02	6765.25	7236.92	37288.8	22606	6836.86	28453.3	28187.1	5764.89	50222.8	41545.1	33885.8	3085.92	26389.7	19610.4	85220.1	11624.6	33731.7
UBA2868	726337870	14289000	54148152	10279200	17636400	619533700	146230820	209817976	944491190	6489.94	63306.8	4947770	948176	107590	448856	132368	199032	65571.6	138729	974211	1650740	617494	730727	1298430	57483.3	1337930	104622	187389	6800.19	314653	214828	836841	110400	292542
Pseudomonas_K	725858100	29515260	1098875190	104140121	93503610	505989420	92959950	72646210	147927630	19967.2	247088	105196430	249478	68271.4	155117	28096.9	28248.7	34725.6	46393.6	127361	224042	48235	109970	78904.6	21266.2	220885	98284	177612	11323.6	96259.1	57247.9	168967	48563.9	125580
Pedobacter	724528472	31316000	51723200	25841700	48726200	4561617790	426311650	173156066	2235177590	42473.4	146956	12943100	3947090	2143190	2335630	1468310	684024	1108500	1077620	2740370	3541790	1131300	2108280	2085740	525564	3230840	1200190	2988680	192220	1956790	1491320	3851670	594566	1765420
CAG_1193	722504500	34920630	44169320	8599346	10005597	1701784000	80154000	157238300	523655800	/	29950	10013564	725981	95601.1	284758	125563	352761	58935.9	51954.8	226522	192069	525438	471524	347460	30632	157995	152265	276246	4793.42	124282	103369	334357	49990.7	203778
Clostridium_F	721297400	8365072	33940040	6810917	2941412	48617180	74117500	128063100	742212200	1999.89	35589.4	5139761	769082	60766.6	277632	107726	142050	43792.2	72586.3	422888	255547	341512	403221	439539	36085.9	247260	67783.5	72006.5	2808.77	143339	142292	331444	66539.8	202377
UBA5124	720856820	23643318	84247210	6850615	33816887	666071000	78900300	33542400	138365200	17323	9669.94	5714520	537293	224340	54643.9	33365.4	38121.4	11288.9	5638.09	107914	69758.7	232485	84857.6	14694.8	30056.6	177270	169245	210992	13060.6	54886.1	37396.4	97838.6	10269.7	57796.5
SKHV01	720822700	25168928	822558490	16281323	23125820	1520453200	51191000	186409510	222462340	3391.05	19715.7	5026156	432074	120876	229271	60711.6	66815.7	70411.7	65047.2	299642	339963	89898.4	200996	178721	30014.4	492875	166400	252554	13570.7	106976	89202	222821	55391.2	128333
Clostridium_E	720381300	6171172	9881930	8402540	5052110	538345900	40553370	75259887	51418410	697.234	18712.9	1146990	244775	15413.1	57643.8	37870.2	11955.4	2919.49	25492	160801	72179.6	78525.1	108601	228397	23886.6	242036	21736.1	53485.8	8899.32	32581.8	26427.7	106372	17208.6	33703
SZUA_444	719067000	5752590	23807800	2273630	9944420	/	4544230	12279300	50120100	/	7615.74	473160	10241.7	34943.4	31008.2	5658.23	54710.3	/	1602.47	15301.6	21225.9	4054.19	35435.4	65236.1	1673.3	28975	6569.5	13349.6	752.379	11358.7	10099.8	28737.5	5607.32	14945.8
Propioniciclava	718707740	28277987	10334510	14961120	65437799	3956890000	103459400	121841200	84236010	/	14437.8	1410990	840531	45816.5	15660.8	19769.8	9267.46	11514.7	9384.26	62215.7	48522.7	49950.1	32083.6	148354	26765.9	72727.2	42952.8	243870	21974.8	44270.8	21308.9	36528.2	8733.31	69493.6
Negativibacillus	716933340	13134400	32487319	15762600	44605500	143577700	48403799	127215960	174465430	11004.6	53520.3	20698000	396592	24274.1	76322.5	81836.3	64797.1	54432.7	20487.1	294599	117171	209268	158614	259218	36753.3	142870	19563.5	148604	14374.8	85735.4	76730.8	225813	40697.2	94038.4
Polynucleobacter	710463132	62011400	40714300	22723400	68610000	3492705010	545425697	136451000	2102556149	35355.5	166077	13568900	3983240	2920930	5040590	2772730	1449920	1956700	2883060	17270100	3942670	1444520	2581070	4275820	2223640	6864700	10217900	3063840	2210970	2978310	2009460	5643970	1819030	4180510
Sulfuricurvum	706851500	7988677	76393300	96126820	27184022	93324910	22207950	56291760	125432220	6498.15	23686.6	18672445	422480	77418	336581	382005	40282	79806.8	213013	322743	315325	161474	171272	215517	56907.4	555440	519298	1518050	46302.1	157791	101363	356938	52732.2	138146
Variovorax	703823300	127490391	19314300	23686700	36070900	14546716300	1325944780	67846300	2197385960	616691	169064	5911600	5764690	2005330	2373290	884788	395536	452249	716849	2398650	2702050	552640	1015350	1764090	997549	2657940	1468300	4720440	672852	974707	711976	1929580	418939	821819
Enterenecus	702186820	13716700	29689146	20644445	16358800	663589630	185063534	160315067	386728730	1236.43	45656	5532820	645873	99232.6	241328	69960	82497.1	23305.5	55536.6	361548	334103	329820	335438	660421	71207.4	382534	86819.3	310417	7486.76	274000	188248	585202	50779	270479
Ferruginibacter	697152810	37915724	24731918	22417500	17369000	105943916600	1336434330	94072613	15728736260	49639.7	118657	6831600	8783420	7590800	1248310	604811	295730	423506	428154	1308160	1819310	564212	1059210	1544810	1748510	1662810	1324920	3045840	967540	1075460	640916	1717010	266233	941059
UBA1799	696926000	4165980	2170110	4841660	15050500	19058300	2171470	16638400	64909400	1212.56	14825.5	2420540	62185.7	11785.7	10867.6	3001.81	6130.34	/	3482.91	10603.7	20033.1	11291.9	37070.4	41478	6702.19	18768.7	5497.09	13994.7	/	4096.01	4133.32	19933.5	1096.34	13126.3
Onthocola_B	696200800	12074390	68769730	23190143	14065709	/	127082090	347312200	1310179500	912.933	66937.7	15060578	1546598	119764	365720	225671	258686	84118.2	111524	1009300	436453	1279590	710107	532828	70206.5	402246	134686	154495	3521.1	209461	211993	582238	138560	336260
Caproicibacterium	691916300	5176949	15398664	10890075	8255621	480268600	68479450	145752260	127837460	1420.65	13416.6	2471590	160836	11820.1	74354.6	12580.5	34898.7	23385.4	20416.6	300070	85198.2	65415.3	205502	127316	12999.6	137721	21653.3	71411.6	7058.78	76324.1	58217.4	170193	15764.4	97556.1
Prochlorococcus_A	690637962	33651300	84642200	25692500	20128900	2445398680	541691344	240586198	4959890408	25066.5	237053	27620000	3016690	1518270	12624600	23126700	3695850	5351640	14338200	25449900	10271200	10352100	7169240	25395000	640902	9190700	3592420	1069860	102932	6512350	7884080	14307500	4831410	13071100
UBA695	690217800	3188080	651399	763665	897800	186428140	50142600	3113796	12714550	394.086	4122.78	164539	80346.5	74639	47407.2	3188.07	8115.65	6803.13	11189.3	37507.2	47255.1	4147.32	32558.8	17607.7	6670.67	30032.5	4457.95	67180.3	5056.35	12511.8	24992.7	79502.5	10072.6	40786.8
Sporomusa	679017600	11412375	12633965	6310772	11219610	132793250	45831370	42948895	180297600	842.09	24961.7	2653062	398920	29569.6	152563	48798.2	18874.8	19231.8	20596.4	208473	133174	183359	342813	211543	25700.3	113782	42061.3	272736	9265.52	93581.6	65567.1	265807	22868.5	97649.9
Acetobacterium	675744090	10210229	88032270	29763742	87290600	277621500	82494111	477948610	437957960	1357.91	42421.6	7293721	784661	136446	285518	132202	202191	41674.6	62715.6	396208	340544	376953	469109	738306	43730.9	270572	83129.4	488480	3700.26	166313	120394	382072	64772.1	222335
Tepidiphilus	675693150	6126766	45600255	13856546	20805354	834192200	64575950	118993328	114423460	7074.59	37272	20104956	169925	71714.5	47714.8	19823.8	12595.7	48054.9	15253.5	95932.1	83349.8	47682.3	46688.2	74451.3	18963.9	594805	32091.4	145858	12200.1	54756.7	41595.6	68733.8	12590.3	32897
Bacteroides_G	674227080	18130200	5660770	13238783	31219900	63219200	22378680	48707800	113437300	1611.16	6024.59	1459654	33640.8	38365	68801	6733.29	16474.5	20562.1	8293.58	35020.3	61377.8	31518.8	37519.4	33123.9	15864.5	74974.2	291731	1573470	32974.3	25737	24369.7	137556	10232.9	30550.3
UBA629	673926670	7035133	42118256	11882393	23968794	64305700	20810281	722067650	190351240	1029.01	22233	6746910	197017	59494.5	241905	21833.1	37908.1	9489.02	23248.4	181332	240407	309876	257290	1207960	20366.8	297029	37036.2	23930.5	4071.97	117301	73070.4	246116	40807	140454
CAG_273	671793300	18260167	99838890	15935667	27720112	405220160	186164330	934697360	2010789800	1297.17	109584	21470839	1801000	165757	734285	327970	256742	96884.1	79916.8	955781	623538	1334370	925053	1104530	108562	682305	127459	262207	17292.3	465785	370542	892436	186267	814911
CAG_488	671510580	10978800	46323485	13939000	10798300	461569530	86729401	157216230	447979000	3318.16	36492.3	6348970	1174350	77249.1	373842	176391	151417	51531.5	105184	823953	392317	553806	635241	733731	47882.4	494975	123029	128444	8274.08	195854	222640	654978	108063	298034
Enterocola	670674730	13431732	49533388	17880400	22506864	486304490	77056938	164175118	245509873	4410.69	22193.2	5450290	578220	167929	369265	225374	112335	233217	92921.7	310641	1251170	164755	366973	642147	47813.5	633644	243906	755186	23876.5	300194	148336	482323	99327.6	264826
UBA5194	669990310	19133571	103922350	16430700	30866970	401251000	16565770	154864200	188711400	3645.79	40295.4	22307200	532070	105601	189709	20946.9	57835.9	29288.5	28473.2	157210	104682	65451.2	214031	84879.9	42392.4	368623	138569	221178	5105.65	63092	39103	133823	15744.3	104078
DSM_111022	669561100	1528632	11127070	7262614	2626957	157791900	22611046	186147430	179070100	/	13732.6	2802620	168136	16768.3	59406.7	22365.6	77240.9	5885.39	18403.4	145601	98891.5	170689	139590	143772	4124.87	94195.6	26598.6	14379.8	/	26323.9	39728.9	111367	11139.9	105500
UBA10649	668480530	21057956	7741167	23196905	26692200	5164861500	255841143	192953160	1959214000	18821	55473.3	1897272	60517089	1042580	250273	105887	48552.8	22402.9	59168.5	4896598	170960	187781	153514	221571	2554500	1484000	1075410	2184650	180156	108872	68031.6	251808	44430.8	87328.8
Kaistia	668442300	7060609	4169870	3987720	3788440	866443800	175353500	35596908	164534220	9038.19	18503	2817540	5604090	108206	190342	49287.5	14805.1	34251.6	28030.9	184821	149230	46334.8	69326	88496.8	86014.8	133381	58536	258321	28837.8	99358.6	65576.5	182587	39058.9	77030.4
Ventricola	667663820	17529132	34213700	19598400	20643700	754489780	181209739	179491250	643830400	6475.2	70260.3	11020700	672003	81736.3	308408	75375	223393	64644.5	83706.3	263193	484491	509179	423096	702408	114346	363508	142871	340166	17670.8	227050	196203	733212	78012.4	219047
RUG12834	666640880	6120816	31954390	6053873	12056870	/	48807510	182265340	482803600	/	31135.2	6053890	387497	36650.8	370184	50390.9	40628.5	39684.6	55221.1	141316	295530	423909	221721	168906	43641.9	222421	51074.9	48485.6	739.531	96043.8	100130	200984	48347.7	165147
Eisenbergiella	666301760	13066300	61523758	21387422	44632100	179177900	112870027	379829610	326846233	6465.78	64385.8	21953900	586170	67740.3	231649	97369	137199	56749.4	79925.3	398972	338810	542678	441263	561271	40512.2	318592	74774.7	188908	17583.5	761985	208163	911257	76254.5	884121
Tabrizicola	663163330	19234980	14195200	22211694	52762101	4377626200	157667430	125804730	1975704140	15852.3	56733	7289267	1760980	904606	693415	247027	143646	273438	244283	907486	498923	166812	246445	237825	1011230	2130810	973084	1506020	1290170	280914	213010	668275	119064	244091
Oliverpabstia	661483940	9377952	98236060	22967200	53680369	211361300	43181520	940203090	271326800	11160.4	96019.9	32483415	571232	55910.8	139688	54220.7	52080.6	30641.2	18583.7	165458	80515	157555	231168	233674	25965.7	227006	57218.7	117906	31936.9	86369.1	58700	272797	35594	82710
Caulobacter	661328604	40517123	10915800	13877500	58165000	4237507770	589688740	74309200	618590702	1177110	86968.9	5207750	3911930	2502680	1288790	390421	214813	208891	298336	923146	1103920	265413	477707	677506	408073	1149600	500805	3509210	733129	571493	402195	1336610	216253	439016
Comamonas_C	659500500	39647780	5643680	11592809	24597046	4323672900	136731700	39867080	301751900	45709.3	23211.3	4798640	616743	166334	102156	161968	34429.1	29123.2	66620.8	161596	193038	40048.2	48868.2	63962.2	48773.7	333852	69368.7	223726	40817.1	77021.9	45812.4	170313	44108.3	47566.3
Aminomonas	657909000	528814	1415820	4635340	15180800	902826000	3429030	5126700	10000700	1754.62	5371.81	910284	24491.9	33921.5	2312.85	2584.38	/	5851.44	/	10137.2	10519.5	1556.7	6295.2	/	441.649	20740.2	10676.5	539475	2283.37	9806.16	10148.1	20545.2	438.991	10970.3
Actinomyces	655240770	45788664	93770800	57586000	56838500	6285354750	763447690	1255476330	2037978710	31426.5	192655	12587400	3139210	182766	1003180	253765	276279	86811.5	192568	1286780	1200970	1000100	979605	1580440	172578	1077710	192228	496036	27021.8	461765	478105	1434350	264080	508536
COE1	655036910	17930700	118204769	20012500	33574600	590222740	146491477	427543960	831765142	7297.22	74938.3	12770900	1253920	151451	713139	265184	451680	103977	144866	1087210	709365	1269530	1140320	1365910	104058	803534	134516	246459	12985.4	467012	332324	1021940	148610	494178
UBA791	652466600	2976792	4478450	1490111	2359075	27289100	19094376	24450340	160529900	1226.85	12470.4	1880690	92632.5	81793.6	163399	81614.2	39848.4	36383.6	38607.6	148525	287488	55119.9	138056	125967	13384.9	111830	76679.5	107902	5207.57	105529	86556.5	182922	27023.6	115622
SZUA_378	651593000	6412910	89206700	16105800	32432600	15451500	23222100	457495000	35257800	1804.67	12913	6060630	78440.7	31683.8	7274.42	8370.37	17320.2	8633.16	12540.2	107437	6209.42	16434.4	64717.4	131066	6452.34	140913	18077.5	81564.5	948.354	10312.1	14038.4	35481.2	6670.15	14804.4
CAG_873	650848140	11966100	21971200	8964160	9309710	1527784340	171111134	69927413	505813376	8377.81	56054.7	2873120	1337140	280377	1053800	496266	210061	346803	349509	887002	1678160	366990	584603	952640	106592	971737	404852	373125	22664.7	827412	600228	1914690	260616	732815
Limimorpha	648662546	23537100	40429500	15591500	17906000	1600098400	294784855	108607120	1281305657	11577.8	88633.6	5370910	2269780	541887	1981440	781756	538455	566952	884627	2347710	4957400	916755	1920680	2107850	216457	2347000	770769	573657	47058.8	1474620	965679	2589500	422124	1278610
Sutterella	647253280	15222347	40760500	23503900	39919500	1242822310	260158200	35007000	226373550	7563.46	42809.1	25658300	575208	187085	655695	285438	83782	131713	418720	842077	516863	107969	284001	337990	170800	696667	197164	434425	126625	271458	212616	546460	142142	290366
Proteiniclasticum	647103150	7386006	173902596	15508800	52961339	88246860	38838630	700576020	190578040	4446.38	22457.1	8949553	247913	38306.6	139777	57055.2	46712	11616.4	5169.22	191604	130170	260309	230460	349516	16322.9	174828	45712.1	152466	11565.3	55516.6	61905.9	249382	26705.7	131535
Dongia	645033330	15508020	6713560	7979985	6613800	10769081000	103091610	18716962	1409661800	6911.22	16609.1	1692950	6316888	545636	73913.2	65854.6	25122.5	17656.4	17086.8	119402	125276	15773	42321.9	71736.8	58727.5	108641	74970.3	1988990	34558.6	51887.4	45801.8	202486	29403.8	60053.9
WLYX01	644919000	7869290	2231260	3136760	14098800	136207000	18610400	2225440	12262000	975.191	2581.56	697667	65230.1	110771	47888.3	12164.9	2936.6	3071.24	4856.03	22374.5	17258.7	4998.76	19276.2	3637.03	3842.21	25285.3	30741.5	29132.5	13024	2652.56	9126.21	107901	435.066	17578.8
Micromonospora	644098794	362872506	60032431	37851000	25498400	37533440900	5674348700	353667384	7580168090	68562.7	487979	8839410	24161500	853832	4194340	1018040	839716	298441	597853	4985240	2907840	2645580	2539030	4765030	1092420	4705960	753733	3656630	236959	1189450	1174880	2798030	665297	1386520
UBA6857	639026260	19890100	56797119	16602900	6911690	620335990	133241881	243083490	899635240	6060.6	61969.9	6710310	1723030	127564	397317	166404	239645	36090.4	72030.1	466005	618222	897639	803799	770729	76988.6	556320	126734	194011	5998.77	302869	288017	915767	112986	334446
Anaerobutyricum	638950240	16715052	161407989	34817000	128498145	340789400	128691630	2214878879	513856190	17818.8	222634	61561100	1210610	54704.6	408177	133414	148403	15834.4	48276.4	485723	305735	372591	491082	697831	47968.1	546593	132039	188866	49551.8	175792	141220	541107	66332	213335
RUG563	637328180	11697148	24474030	16218006	8886810	579159330	150167496	87557437	639991674	5292.42	39012.2	1655380	1075840	59742.6	263182	77886.4	212739	32193.8	83808.9	508237	452403	670513	388564	687613	49001.4	431502	73453.4	238677	9453.78	183657	135671	609171	81525	154981
Verruco_01	632473400	5897178	180895510	79667410	23679413	157590600	8860420	748308100	42502620	745.449	10040.4	9221840	477758	114714	41956.2	12858.6	18991	/	8791.44	62932.3	74325.6	7621.66	25754.8	105617	6964.66	849536	49215	61713.2	4812.12	66158.6	14169.7	40397	8702.78	84937.7
UBA1796	632186000	4447010	4197920	1908260	7320200	59585000	2020800	21030300	38286600	3703.24	26284.4	791233	200426	3810.34	37815	3999.49	9712.06	15228.4	473.835	/	11953.6	39474.7	26608.6	31920.3	5417.5	22888.3	1473.86	38368.6	2245.7	6026.27	4710.23	21252.4	3117.36	11731.6
UBA6175	626442300	27181862	49320781	20442024	32285990	2153016000	39147433	502502500	409570640	17557.8	87767.2	36275470	2868280	1385460	237859	70397.6	237231	304460	15674.6	52565.7	211718	155686	136086	133364	53627.6	1076230	146732	1200410	25099.8	137835	47070.2	289216	47970.4	89975.9
UBA5559	624725000	5971360	571674000	28642100	54296100	189222000	6240180	1694180000	226678000	7350.71	40893.2	15336700	17252	43841.9	2114.66	4262.38	5327.8	9157.24	4922.91	49583.3	3307.89	3223.19	23247	/	7509.42	62264.3	79301.5	179156	6121.42	13374.3	7978.62	24400.1	2804.22	8996.66
Ruminiclostridium	621871400	15544097	34632550	7403181	5649534	176678570	137344610	120657510	474398400	2791.72	42426	2652380	890860	53842.5	213741	45672.2	77661.9	22952.7	45477.9	417014	212140	302769	326809	287514	50331.6	216647	69156.1	172018	15129.4	143609	109001	361124	63833.5	163065
Dokdonella_A	620920810	13213500	17735520	5897100	16142135	1139516400	208384930	15886641	194455760	10657.3	31089.3	2527490	6023567	156688	287997	95749.1	35137.3	50906.6	64549.2	262435	196426	43520.9	116860	118612	50918.1	196065	74208.4	270371	15143.4	91297.4	77413.2	230549	42602.2	98888
Magnetospirillum	618992200	16052216	7927252	7589345	21579678	766618450	160003380	8098650	93181470	6092.92	39272.3	2685630	417548	311936	150487	60234.2	19834.7	86322.6	81450.9	302025	250714	62041.8	124550	179734	112125	331450	260707	1139440	35396.3	124196	98372.6	308714	61080.4	124328
Succiniclasticum	618500300	6179617	12981572	12416201	29418496	202015700	41564550	57401330	353170270	2096.74	22161.8	2894360	866699	87613.4	115847	88580.1	110356	33774.9	21220.4	249398	310892	272957	324194	504731	24772.6	344876	37437.5	72498.7	3174.39	139371	105978	258732	29695.1	206073
Cupidesulfovibrio	615073500	3541033	38232190	10446770	22470890	55705900	16568558	50034190	44127980	602.475	6539.62	3531111	141954	31536.2	47868.8	22559.1	17346.6	13362.9	9035.84	43798.1	127617	89163.7	37560.4	112829	6369.3	63291.1	26583.6	177669	3520.83	32655.4	22801.7	79257.4	16712.4	36764.7
Paraburkholderia	614125998	128167592	21595100	16990900	26315500	14814317870	2020553890	68336600	2131105438	497096	175919	6064450	4168900	1721800	3347760	1065580	604432	717699	942277	3044870	6242990	1023570	1666450	2977810	596292	3600860	1253730	3123530	293023	1667180	1171800	2842280	937131	1561470
Methanolinea_A	612313200	1270360	1137018	6973620	2989360	273034600	31766805	5353680	94170630	601.057	5811.25	433058	69271.4	14570.2	17215.7	12845.2	17903	1457.28	10379.7	184357	76966.9	34926.2	78096.2	56611.4	5851.82	46131.7	13205.2	71302.1	3980.76	46063.2	42489.4	103349	21351.1	48190.5
Ventrimonas	611249380	10548839	78052528	15080155	39086500	393416410	72313627	270703230	452217830	4436.87	74396.1	26030400	642910	73135.6	241177	95576.8	116554	44068.2	59003.5	658873	1256500	461848	674885	506485	28489.9	755157	70707.9	158173	28317.6	202778	136232	598959	65305.2	192536
Draconibacterium	608128060	37968059	2098584960	70177028	36142119	1570462600	104971270	735516460	1125969500	17278.2	112371	93064139	739997	161041	551604	179883	120613	245133	122329	741543	626764	182127	365968	434925	92082.2	1123090	552364	890510	55460.9	386936	203384	558115	100912	345478
UBA1394	607448970	7963017	101909280	10253387	20032325	320582590	81439761	233886530	346331200	807.808	41461.3	6761836	1123440	82267.4	203558	115681	98215.7	24276.4	37367.1	324084	203143	264665	296169	443619	44084.5	213161	45489.6	99475.7	12256.3	114503	122408	351891	42265	151938
UBA1711	605274244	16126700	26392451	15929000	13276300	2561117680	313045738	97977367	842530560	9910.68	71763.1	4449310	1881780	476074	1867150	741701	477779	434805	706991	1320730	2750000	765819	1418740	1485840	130881	2232180	791599	464146	40492.7	1526760	870175	2351120	452128	1392690
RUG099	603253411	20174500	47752900	19636700	14564900	323310880	195388616	319582090	877766850	959.984	74968.6	4418723	1419080	229808	479268	224171	168059	67704.2	150786	883678	1101790	814888	1102770	1415970	90588	677563	259898	229451	9632.66	488838	388759	1358910	174568	532232
UBA2211	600655000	544071	5565140	542756	/	/	5388590	3817870	61584000	822.631	7268.7	903891	112139	18744.3	20803.3	/	2711.13	/	3218.08	/	61612.2	10965.6	110013	/	/	24189.9	105750	93602.9	6937.22	33265.2	22990.8	24359.1	735.012	43863.4
Eubacterium_I	599097700	9049541	64395200	13649717	51127600	159239100	68646990	391267549	519428410	10562.7	71577.1	19320700	637419	43726.5	139847	117900	61360.7	25608.1	64923.7	242430	157807	256306	275356	447198	43961.8	456191	22917.5	103397	25116.3	130820	87338	386340	39283.7	128736
Alistipes_A	598923650	2681477	9173272	5171390	6788780	418153760	28900042	37636482	117045083	1828.97	16200.7	8533990	339778	69099.9	110403	59158.2	23825	41476.5	59160.6	166226	182607	48884.8	115314	141252	17621.7	215116	57613	116225	28107.4	105073	91225.2	296716	32261	111245
UBA9973	598292970	109958499	66517625	27300100	31659723	21127044000	529589280	276079370	16524231500	13576.8	497657	19013900	26214500	5714080	1598240	831374	566171	376191	348867	2951030	1656900	1869500	1956140	1672190	2068040	20674000	4633760	5360330	434321	968972	998947	2833200	436679	971995
Scatousia	595433600	2629070	5236620	2586740	1390169	80951500	8497038	17333386	110575520	810.145	8396.68	1418750	69511.4	26549.7	39528.2	23176.3	27658.4	14955.1	29876.7	218447	120856	39408.5	82097.5	72168.4	11827.2	147118	60825.3	124729	3762.85	62514.1	65651.1	123610	20711.3	59699.8
Anaeroplasma	594030750	50003994	136416920	29052752	18351200	3445737900	262585246	528459240	4545693300	8457.21	206626	17947511	5551190	2911480	1079340	744360	1651830	216458	333020	3936400	2463760	2606000	2600780	2567790	981974	3169030	508575	1261130	88012.6	662157	598933	1718440	232452	775640
Laribacter	590812350	58507337	71636059	38342400	43860644	315848360	27120130	234130520	19030000	8399.91	56495.8	24715000	109636	98160.6	28988.6	17416	5088.73	8700.18	18028.5	25818.7	44608.7	15050.2	15054.5	12233.5	15302.8	66675.6	217788	677321	27270.9	24549.9	15210.6	112259	10545.2	7939.98
Anaerocolumna	588976260	14240729	51697900	9494669	14530149	242867690	105297060	214665580	1016916600	2383.69	45365.6	4842790	1078720	77155	266183	156372	120462	49759.9	72373.8	493195	273322	350557	455777	606777	73287.8	357512	95617.1	332290	10129.2	179481	128352	422674	64286.6	189666
Acutalibacter	587331960	11418400	32955375	14426800	16983800	550432930	130339185	260151478	495952180	11162.3	49428.7	7272090	1212920	81419	219892	163767	150350	45959.3	60766.9	455999	363548	594509	473175	555467	62383.5	382169	89551.4	170368	9492.6	203640	164747	639361	58085.8	189779
Nitrosotalea	586665690	4872560500	22404100	12435968	1741920	890858900	92554519000	100301700	347385320	16257.5	6606970	8447230	927067	68116.6	162352	73629.4	27337.5	30787.3	45091.5	243529	171991	155460	368428	230995	158911	165490	324178	568769	33907.7	128436	173570	558839	50986.9	111562
66_474	584625850	1129663300	6995883	6780768	2484514	1560730400	5352356000	29098460	110290460	11000.9	154394	3301350	229906	41226.3	128974	27733.2	22149.5	24208.7	43229	76205.4	198679	37870.2	53979	31908	27197.8	118958	52049.7	99526.3	10712.2	44895.2	68561.7	194229	28912.5	66681.6
Lactobacillus	584533747	38312500	158817030	34616200	36987600	861818500	249945081	951334432	2976566200	15982.8	211419	38010900	3553660	282950	1228750	457735	794450	318980	287043	2326260	1513460	2048400	1948580	2161830	258324	1658230	414133	466802	25585.5	853280	648921	2145610	275561	1004340
UBA1417	583673800	5302850	23612240	15411898	36065500	464613800	56876300	442650513	113103560	6441.22	82195.1	25280900	221627	47124.4	106661	60543	52267.3	2398.88	16488.6	123316	50724.6	129719	90076.9	212636	9639.48	123120	15287.7	147979	10914.8	75236.1	41313.4	99993.6	19365.4	37881.9
Acetobacter	580129835	20333500	8697230	4250440	5943860	1177581240	273168311	36860000	292476311	16030	32567	2550770	913247	198940	682647	314918	273682	361429	248641	933896	589345	228470	458054	545554	65115.7	656586	269262	427330	32311.7	402929	336109	1037550	151944	495551
Lysobacter	580044550	35804546	19448000	17404630	24904098	7286464300	775731600	86742173	1190617770	57178.2	154476	23449909	11994300	833213	2628630	609296	206786	401730	503662	1355950	1435330	348953	672626	1121570	332576	1745020	643856	1741450	153369	662783	531663	1552750	300271	676720
RXIX01	576898000	17560600	2410220	4017590	14182300	693589000	18733700	8623340	40894300	1083.2	22651.2	1909790	86779.6	53824.7	16334.1	11699	4258.93	4077.33	3234.22	4874.38	44912	1971.5	25587.2	21487.1	14797.6	112420	4213.12	68173.4	6476.89	35491	7023.56	64048.9	8096.63	62735.5
Elstera	573587031	13929000	11510500	9865230	19380000	198081220	24019708	14450400	35086530	2438.63	20889.1	22570300	88474.1	61380.9	43437.9	14676.1	12544.3	8576.79	33545.8	45969.9	46840.5	35883.1	37338.2	33478.3	18847.5	93511.5	191607	958007	26333.1	39597.7	21003.5	77810.9	13444.7	34445.3
UBA1436	569624440	3882940	18430300	6212750	6971670	399496740	33053903	31171736	139470550	297.673	24483.6	3938410	225739	161122	294231	66214	44549	99409.8	56343.3	179164	698171	108604	273580	193678	44174.6	355259	123104	199497	6748.81	370516	151143	547824	72666.4	427195
Clostridium_H	567273400	11947477	52151690	8316405	4732820	182668000	112837200	233886880	781248100	/	40005.1	7305723	553334	96999.7	387088	139253	143810	35924.3	63177.7	970279	259784	561133	615501	508554	53269.7	399561	109709	65608.3	6542.82	204770	148672	454169	77212.1	284636
UBA7862	565991360	16189752	53649543	21639783	42302160	259364800	59837170	186476110	571584600	4390.67	38290.7	7722911	597079	44600.8	226987	62842.9	111309	19404.5	116963	679812	244596	481901	569865	651251	40921.5	357979	53255.6	115850	6135.22	163183	125443	281617	47093.5	188146
Clostridium_I	563057600	6891376	23525718	7109570	2963020	145352970	72205065	92440040	773721900	520.692	30231.7	3890470	1301060	45160.9	181388	37149.2	124918	25376.4	31033.7	350295	207258	217113	328748	270898	45490.7	274035	49285.7	75179.7	4894.03	145696	108044	274000	39768	167485
Pelethomonas	562154980	10790785	18892352	11859657	7942630	388003570	102849602	112063801	234728680	921.734	44307.1	2725270	846543	40039.7	232089	77691.3	94128.3	24384.6	56942.9	408623	317044	541519	487400	548475	31473.4	412036	57806.1	168577	6620.74	198652	153006	535355	76488	146651
JAGPKW01	561730000	10848700	140913000	3002060	4695580	1486290000	37585700	90622200	437761000	/	4177.75	1417700	1113180	197391	143593	114814	26461	17912.4	21330.9	239660	103684	236095	58349	55737.2	13818.8	347748	213040	158965	8273.88	5954.28	35772.5	41045.8	3723.17	27833.4
Hyphomicrobium	559589030	35331284	8529400	7109420	17428700	30996946000	1030359140	26901750	1137017050	94436.6	66981.5	4493450	2769230	964390	956320	343163	86826.5	164285	180827	1507070	663414	141241	276445	383913	659008	1707030	631935	1940590	438189	297476	283859	769346	156170	308733
UBA11524	559464510	10150300	84808864	19427200	25054500	634118760	107792826	370107813	217363970	6381.11	64096.4	14690146	473780	52469.1	149838	66502.9	71188.5	23328.9	36745	641139	281405	273191	300939	255757	53248.4	344997	44682.3	180383	14593.7	149128	149367	516221	38877.3	152320
Choladocola	557446820	13195721	55725198	16010818	34209300	320660050	90537660	237431564	465990802	9889.59	73301.3	19095200	601125	74272.4	367752	65240.3	111327	47831.5	38433	552663	339399	471828	521887	645248	67164.3	589331	88441.4	169620	14419.3	182516	195477	638340	88353.2	219841
Acidovorax_F	557007000	2655620	428147	1382760	3056430	101213000	10592300	1474090	35693600	3182.75	2387.05	241178	70105.7	44734.7	63827.5	7234.59	7482.56	18724.3	4460.93	9133.68	19352.7	3235.88	5133.68	32580.8	3904.13	21450.1	10750.1	38548.6	9324.59	14375.8	5696.71	24785.6	6643.25	6018.41
Pinisolibacter	556309200	27805535	2009640	4606120	14036734	8689219000	50023580	16439767	53133880	771.448	9340.69	1009828	2210470	73521.8	69302.7	37411.5	2760.35	18208	34503.8	33111.9	80794.7	16904.7	34076.9	41999.9	21493.7	111683	64184.2	210408	14101.9	28574	24999.2	103877	19306.5	32127.9
Firm_04	555553210	9530027	18323855	11594600	12439400	747934880	115891799	105279689	242522369	10876.4	48556.3	2047340	1321830	78864.5	357487	79123.7	130964	49995.5	80060.8	453625	633889	371738	531714	440280	59710	398998	75353.7	139497	9644.85	246247	177305	656257	68560.3	278283
Limnohabitans_A	554728110	176233930	9997250	20853050	77575607	3489154180	229632686	38149795	866060801	213186	49393.9	4071200	1195050	4268440	1273730	761515	302184	368238	968759	6393880	812503	302877	485671	899379	6256670	3356530	12164700	2970888	14842000	918866	352936	2027450	474687	921808
Fusibacter_C	554242230	21868192	1005541450	54378630	53992260	356920320	210398872	6817758400	551645680	18141.1	157310	107652101	563051	95176.2	376432	289333	171188	80299.8	189073	595598	613520	665406	536161	1794250	37681.6	2773410	94446.9	197338	7551.83	224429	211366	504663	74172.5	248696
Rhodococcus	554120223	93069350	39158200	42319900	18860400	7263349700	1612790650	292630685	1436436050	35580.3	235104	8745930	6140880	468370	1530560	288528	267790	95055.6	190767	1424640	1000440	889245	841456	1726540	243302	1454070	172721	1193080	50276.5	418512	385301	1170100	212677	469780
UMGS872	552537520	8452280	147543160	29937793	31421835	50663900	26952530	946921500	254214000	4103.41	51024.9	31847901	1127760	64646.6	128424	38058.3	199760	22050.2	56276.7	124049	184414	106144	144249	196895	61605.4	301302	164316	56357	7577.98	58723.2	38191.8	112788	25038	85142.2
Pelagibacter_A	550320030	31232900	82852900	24725000	26301400	1102249400	466232080	235490615	4190920860	20960.7	268055	26067000	2843900	1649210	44157500	30190200	50131200	91179100	31820700	80922000	112867000	60174300	53303800	37294400	559101	11389100	29499500	1099250	109623	19800300	73867200	56015000	21629400	51464200
Porcincola	550089450	12719800	22648000	16994575	15797299	500942040	148970386	156212850	352032220	965.598	36535.1	3872520	1009430	83242.6	219185	85225.4	41468.3	47675.7	58173.5	377595	447845	414562	544184	623391	49229.6	317702	78857.2	151424	4923.36	168331	171795	568792	81268.3	170074
UBA4334	547746960	7475600	19155500	8293370	11368000	642200720	113125717	107531682	460196420	3760.56	47169.1	3950870	587398	201159	770840	601462	300737	451709	428533	716844	1821390	768703	897980	1515590	79152.9	1216910	353918	277662	20862	863518	790227	1551720	452317	628611
Bilophila	543874510	7581075	115473060	22064023	46342292	116822180	24020538	106093050	72187500	4869.03	44126	39284600	188118	30116.4	45415.2	21004	8871.46	4811.62	20062.5	92542.3	63604.3	53900.9	58622.2	30817	17682.7	89451	56322.3	368390	39418.5	54472.2	26335.7	126447	27459.4	36857.7
UBA1934	541349400	43205100	5764975	9226450	25215650	1927258500	27822390	24337410	332424800	6728.98	8776.9	1573924	1107500	1595080	41652.2	32599.3	26622	43015.4	15340	407208	32469.8	24079.7	39530.2	60917.4	115708	1017120	136638	334189	14264.4	30703.9	24747.2	124545	18747.1	33363.4
Onthomorpha	539744650	3789905	7934921	2389800	5069010	249200400	38114562	26807535	313710570	179.024	18638.4	2284750	249981	106395	255988	157851	47801.9	14555.7	80157	384388	229504	148745	268234	189958	36977.5	431590	141367	169935	10835.7	267578	145531	403288	63666.3	242125
UBA11358	537129910	358050860	7338490	5461080	6356210	75388650000	28777652000	27534474	709326970	7388.97	232072	2748530	2106340	647804	500652	186723	213508	221861	188021	1354550	523678	155911	400697	624138	807138	570465	1400590	3896840	334503	453057	289161	919039	154592	545611
46_32	535031980	2888130	2366980	1960700	1817850	789961000	63020203	5211133	192797580	3843.56	7618.94	412230	1317340	131013	61756.4	50301.5	28677.9	66754.4	34593.2	97776.7	117632	53645.3	74462.1	97722.6	43029.2	99304.2	37658.9	237354	14844.1	84465.8	49087.7	157747	19135.8	60953.4
Rudaea	533128060	765240087	6444020	8951230	5953822	5308991600	10529902100	24344293	381416190	35826.2	672534	5706660	764987	154546	318379	117613	34067.6	52244.3	77709.3	314731	170421	37262	87422.4	93371.9	55819.5	246353	70202	282609	36466.5	88890.7	66625.1	233931	36963.5	66400.7
UBA4417	531704950	138405450	17284376	5856822	20030669	803629200	160673040	43578460	309401360	4071.82	23138.3	2000540	832825	152526	291111	87242	57139.8	75876.4	125440	332081	388975	116447	236959	198605	55156.9	327927	165556	399100	30583.9	168779	148558	383853	64038.7	178668
Limnohabitans	529490680	55986200	15890100	13875900	41310800	1966046990	342663670	48271754	598014723	120569	91875.5	3718320	1273570	1527390	2125630	1264140	521890	592685	1136650	8592810	2568660	649142	1313880	1951970	3243110	2942030	15016200	2041720	5429390	1644070	767874	2115620	963339	2064200
KLE1615	525509100	8595330	98811820	17906539	99393568	452241000	20208805	202169460	155981680	12579.2	132417	84560755	199784	33040.6	80554.9	15503	60888.6	14836.6	22029	94483.5	47404.9	173747	63936.9	63775.4	15982.2	185895	18935.9	77037	34232.3	37986.6	27608.8	125165	13728.3	30460.2
Catenibacterium	524789300	9524721	67828570	21745764	54366400	53578100	24880405	957347700	290036710	4227.97	99233.1	28857377	344227	38605.9	78486.2	30949	42840.5	27517.2	28671.7	211812	133602	216874	184787	347783	8143.43	187248	36356.5	152950	85435.2	110067	48232.9	163307	21009	140323
Breznakibacter	523021700	2975546	40073400	5544188	5645925	167152200	11511690	112812300	40967100	1056.85	6143.17	2783100	154684	24604.5	42527.4	18101.5	13326.2	6072.65	19303.8	57400.6	56456	26189.3	54951.8	53728.6	9501.16	75792.2	23571.9	45969.4	5945.42	39960.7	28929	63262.9	10431.1	41512.4
Enterousia	522048262	29724500	36795600	30504500	10456400	1425320300	267388156	129443624	1196257458	7102.51	120376	9875880	1807350	645312	1843000	984389	517560	683861	718995	2027120	2951260	996547	1757780	2433020	267424	2070710	993186	652482	43007.8	1640440	1389090	3377140	472140	2098780
Roseiarcus	519061770	463594440	1340440	2825762	1307380	1127740700	7781297000	10510866	114004550	10216.6	56428.5	835171	234656	64435.5	159221	28632.1	22575.4	56055.6	35693.2	189318	115272	43242	62224.9	93937.9	41519.1	147684	121116	223421	37592	114461	104269	300510	32108.8	77540.1
Azomonas	512515139	2432526	3603760	2763340	5829511	6788890	11754990	8165750	48358950	4584.54	7830.42	5865212	162001	64123.8	98271.6	46252.2	20283.2	32543.2	59976.8	67351.9	87420.9	23847	39575.2	51597.7	11161.3	988744	62029.9	68762.9	7688.99	40387.4	27144.3	110617	47231.3	135590
Halarcobacter	510859700	30807587	3103257800	216713140	19941553	1158548940	136086250	5036536000	634669600	229495	1889170	2301693000	927359	375988	512878	337729	134933	245789	692626	477246	544672	230728	438576	570658	40020.5	8659609	299903	323006	7038.68	356496	317767	751908	171284	835596
Diaphorobacter_A	510728740	20615325	8537471	12963480	58663364	689899570	55196700	42828473	148673790	59605.7	16405.3	4811060	324645	190885	113137	69678.2	27956.8	56224.5	43903.7	181492	224111	49764.7	57445.6	103722	42736.4	164836	114413	277659	57617	53851.7	56416.3	180624	33615.5	60665.6
UBA7173	509342850	7390660	14870000	7220250	9263400	657121760	101823655	48716856	441310558	5959.67	36490.1	3860120	753044	167127	432358	141569	175986	206869	201998	681408	657249	229827	403011	421960	53937.9	544057	389518	234126	22782.2	456252	306806	910566	122587	468058
UBA1712	509239380	8990730	43573890	12391968	7986580	135395500	77409617	205697110	653964740	/	53706.5	4730890	755780	68527.6	671700	115986	151562	30684.3	64127.8	625288	314735	408913	472672	337150	44392.9	322256	67774.7	103562	3697.75	224477	150645	815236	83254.2	239831
Thiobacillus	508861940	56178640	16155061	38031112	31635400	13769514430	377423570	48284808	1800795700	219450	45569.6	7162090	1773050	375823	782112	234986	89883.6	129083	152866	1168870	707205	154334	346992	376427	115054	1558550	378868	731549	59044.7	286652	193770	839110	145466	259513
UBA6382	507030910	4133220	8123890	5056900	5005050	457154390	77474555	62380920	205841040	869.655	18819	1868090	295674	116814	321663	128901	97732.7	72639.9	75193.4	242617	426006	95860.4	246592	234839	34100.9	380850	112356	83732	9147.93	187530	141631	540017	84345.8	191099
Staphylococcus	506873212	50368500	173179976	32531300	23819500	944516800	444649468	798690424	4857689170	14891.1	258372	31777719	5859910	422382	2127350	1543090	1383140	492030	766892	3558810	2121490	3323210	3070160	3356700	313104	2060900	521067	701234	26461.6	1104240	1026210	3027970	414461	1320080
Rectinema	502450300	8616840	3280450	23481996	2979010	147407100	33882406	5911694	53392360	5526.16	6648.82	332327	79739.8	78414.3	135106	29691.9	23282.7	18084.2	33548.6	118080	112960	42994.4	97752.6	116793	6264.76	108145	96998.4	223476	2827.3	121590	76838.7	216242	30337	80942.4
CAG_465	501086600	9603792	34210560	10692301	8809170	299903400	117265010	167802640	785724400	/	42760.9	9935255	461026	81376.2	208763	80360.5	140790	58159.9	19362.9	658232	293417	641791	547986	384967	94583.2	199650	213076	80931.3	2235.01	158700	139906	358337	59045.3	119091
14_2	499435650	18696360	89543609	17418499	19110400	677229420	119739551	385655270	1205875710	2912.24	67341.8	10147000	2036490	158850	609375	202225	187546	53661.5	130719	792367	607021	857282	979325	1235240	82561.5	635331	118525	178704	10763	366632	264853	980559	114694	385432
Paenibacillus	495564293	46324400	88841700	24503300	12495500	2512109020	711100209	348123024	2626111739	146646	193979	11360400	5015360	314329	1666560	552667	701913	272887	324631	2390400	2226260	2384610	2496930	2988510	248041	2000060	539862	859860	34012.3	1108640	895659	2876950	384100	1300200
UBA5809	493434000	15232100	4402720	3469660	11486700	147872000	17230900	25678200	4472940	/	28833.9	3051100	43339.5	/	23657.5	/	/	/	4045.03	/	5239.81	2941.12	64463.3	/	437.851	34455	1906.64	15042.8	772.272	9990.93	10937.9	19539.2	3842.74	/
Fournierella	492891000	6345902	15014464	16695116	13006048	341632770	58037672	80354810	133374070	3055.87	20898.7	4409990	353635	47654.6	68360.7	40750.4	57460.1	47785.1	26532.3	221194	192162	199734	142018	333196	12715.6	244723	27835.1	126790	7690.31	83967.5	75099.4	222218	26499.6	64948.5
Pseudomonas	492658970	13295298	17885700	19171028	14164136	1509972000	111065783	47426484	185730867	30266.5	39610.1	23196276	1209990	206531	473572	105674	48556.8	76186.2	118587	265324	371319	64727.6	158305	250602	49455	349235	148514	465785	32147.1	199637	129787	429236	86424.5	174124
QHMH01	492333750	1963665	2290215	416865	2087088	21997100	9371390	9238730	118285900	1391.49	4164.04	432936	49955.8	14533.2	118876	16046.8	21507	15801.6	2672.82	10151.7	45893.1	49661.9	56693.8	10141.1	3171.98	79720.5	30521.7	54196.7	4502.81	27088.4	45044.7	58506	27587.9	27508.4
Schaedlerella	492006780	10494298	54212388	14223796	34635908	295196090	73072750	375800200	468996610	3983.81	70122.9	20687300	697485	40569.6	196494	54415.5	89316.7	23915.6	46736.1	428105	216434	281878	270457	373029	40503.5	257912	66570.4	208914	17888	133830	113765	334853	44329.8	145026
Cupriavidus	487717060	70233424	15357400	14960800	23924900	8158539300	794269130	48415700	1015130780	9738100	102503	6043690	2207900	1152020	1219710	436179	163706	267160	415543	1623790	1217620	257741	516499	820909	329999	1632670	613099	1590710	193925	528027	417231	1175090	286078	484683
Methylobacterium	486892576	55280032	14202900	11744400	15877300	11964987700	1327752390	47201641	1541738300	984176	213051	4446440	2966920	1280860	2665830	613894	526836	665399	658558	1898610	1960500	587175	1009760	1463440	1003000	2832650	1955880	3537680	382445	1182670	685350	1580530	662359	877439
Aeromicrobium	484646312	63272361	77695695	47909700	172704257	4254140100	666528710	466589412	2405253700	88783	307312	47771200	8898650	761548	494484	141434	188982	88607.8	121240	984554	748296	727385	642714	823224	354009	1515820	329214	3004720	223229	323004	314668	912318	361016	358409
Coprovivens	484453900	30098600	85117850	16063099	8712094	125120500	171104960	282565510	2008079500	1412.75	73566.3	13530768	1421280	205468	951513	374989	323101	178954	192193	1069550	884003	1294300	1318650	1703610	123271	777873	158387	226343	4921.87	419800	343103	842545	159852	554851
UBA8914	482746379	2047584	4590790	8335705	11507400	255969000	14457130	23166400	57018420	/	4598.32	2178880	130055	26199.5	41633.1	9128.91	6919.02	53137.3	9423.11	/	54845.4	5665.3	26512.9	30487.8	15422.2	37955.1	40208.6	269220	7199.27	29581.7	21539.5	75976.7	11651	12831.5
UBA8529	480535700	111812950	7324887	2826360	5160900	167676100	94676270	17145182	119916847	468.719	10013.9	890582	167303	51346.2	118275	84057.1	45345.5	68966.9	38855.1	110223	126550	64322.7	99750.7	79971.9	32677.1	94312.4	105285	243233	12718.5	328608	61994	196004	26052.5	78708.7
Rhodoblastus	480327500	12298706	1262380	1218220	1885082	1496334000	284540700	6322820	71568600	5533.89	13796.6	638634	173134	43724.9	98475.8	26942.1	36507.8	25407.4	30436.2	122162	97129.1	17153.4	48681	60921.6	42352.7	155217	50088.6	137572	21472.8	42655.4	41473	125854	20913.2	36185.2
UBA3766	479706790	16524557	88311656	13887700	12750600	313248100	98234853	292097190	1103259730	2986.29	71846.5	6234270	1410040	125716	540539	153494	325343	108621	116576	826933	659431	702883	905786	741895	106733	586165	132528	214069	6833.75	380144	276287	920960	127459	456870
Azospirillum	476123560	15302756	5724700	5887730	5227720	2707391590	389403520	22978500	394084740	21731.8	55470	4031050	1659160	272066	705643	231648	105412	163324	184997	664713	655765	194891	279246	447924	124620	847854	258339	1526950	57525.5	299782	255544	718865	126921	278461
CAG_533	475287100	15591373	56583590	14479408	41343100	225571600	148721220	276325900	1479454400	12693.6	91613.2	11023968	2537304	191177	609066	294668	347743	135251	106452	963108	584539	1114740	857309	552414	90734.9	494339	146225	218170	10195.6	564146	313092	788188	143465	928948
Pseudomonas_A	474417730	25042400	77015381	92322300	43172800	1747680710	221045000	238000005	508384479	38514.3	140259	94872600	1167950	409131	1198920	368915	239211	362254	487200	978847	831009	216283	440601	690906	117659	1481260	390935	603314	98775.7	498084	351274	1044570	276070	646750
Neofamilia	472714030	3502970	85533878	6081997	6224500	16903300	25018090	299768800	213546400	4852.64	20428	4237322	92047.5	23208.8	90445.6	26425.5	35713.5	12052.7	15231.7	114164	273042	162248	137686	230880	15228.5	98192.9	27750.7	27441.6	744.783	44252.3	59578.3	196704	29492.6	96905.2
Frisingicoccus	472085830	11830253	68355700	33046353	22585500	163314300	41484980	366571200	188721270	931.981	32699.9	12897100	499607	38868	119495	44128.2	74064.4	17442.4	29372.2	296010	176229	175851	236069	167797	28466.6	262078	49029.9	158167	3511.31	58149.6	75664.6	218905	22906.2	56777.5
Avimonas	470949700	7194242	18947439	9523890	6933746	136492000	84154680	117678897	178020420	4554.48	27113.2	3018839	333954	40005	201215	199082	89464.1	29713.8	124030	435177	165921	238534	203625	283224	24587.9	111019	41466.7	85408.4	3696.15	68453.1	102382	223554	42492.8	79922.9
Scatenecus	466948500	1679550	3086490	1087520	2765258	113770400	7781853	13014233	81973160	172.186	3933.5	922828	79441.7	42583.2	265446	100889	62258.3	41172.5	97320	277290	260536	79000.7	102759	108650	21313.2	105658	174086	94198.8	4433.6	55974.6	61394.1	122619	24654.8	67842.6
UBA8949	466319600	5341457	5678152	2632510	6324623	66787800	24378365	24056410	38420500	/	14552.4	848739	200151	31086.9	121858	67776.2	32415.2	8680.68	18147.8	126314	67282.6	109714	55876.8	240086	14706.1	22474.3	7514.6	64710.2	2298.44	14960.9	10480	63484.9	9537.65	20298.3
Nitrospira_F	465956876	1035439000	12554400	10730800	3756240	34869671200	111451626400	59131400	394455012	36619	133516	9367220	860903	2445980	916183	233784	101761	163396	148883	729475	402616	128222	303226	280688	4117050	1512860	1776360	4112110	657870	304823	196617	704128	52684	252162
VBCG01	464549330	566225371	3307870	5866440	7590020	12678984200	4510496540	16386678	320476430	55510.3	399106	1924000	372676	120728	359506	72551.3	44533.1	31957.6	51399.9	406242	261509	49226.1	121126	109177	337972	208032	498445	2128960	179726	164298	99851.9	332677	50248.1	178301
Erythrobacter	463325716	19722900	32521300	15837400	18306000	3436396990	471918837	459533610	935995632	118819	118234	18894400	4096810	774405	31062200	7557070	4575520	11241900	4601700	6313910	5284810	1459030	1888690	3048720	386948	7897490	3677320	1411500	859206	1454840	1669850	4767320	1651140	2066250
Butyricimonas	461656230	3526926	23360298	9107580	25566645	168027520	20574267	67320850	108850390	2391.4	27171.2	20677257	293570	57221	174503	104719	35552.1	43893.5	68019.4	238226	236337	52024.8	132172	215795	16479.1	315987	187800	89154.1	23890.4	143894	73020.4	283582	46729.4	135920
GCA_016699895	460901000	2888590	10844000	6777760	16513100	510176000	29760400	361658000	62100100	/	19549.2	11751600	235313	262204	/	/	/	/	/	/	50740.3	/	6375.48	/	2799.8	197054	48166.7	82125.5	3802.66	34850	2426.55	6130.96	/	4143.2
Uliginosibacterium	459293720	29098800	2542326	2489620	11901900	987945800	12911310	4114614	33618300	5652.46	2421.04	537652	46588.8	1715630	12804.8	10796.9	8423.43	26795.5	3851.52	39327.9	80899.4	7077.46	28600.5	27323.8	77884.9	57340.6	92907.4	549268	41788.2	14252.8	15157	37044.1	4028.31	20099.4
JAAYFZ01	458528000	2573130	134359000	3727240	11492300	31868900	3232600	296949000	16865700	/	7343.5	1357860	43581.6	3213.6	90454.4	5542.61	4211.75	2724.69	18743.3	10914.8	38874.5	25892.4	12850.1	/	1455.63	37903.8	115249	11521.5	1288.03	56568.8	14830.7	17298.9	1566.25	73792.3
Sphingobacterium	456140920	16111700	32564387	12630500	15315500	1312234660	217974089	125256240	1107224451	5230.55	83112.2	7262240	2344860	644397	1283110	452217	444806	508196	349386	1298200	1703860	605788	1279410	1150100	222731	1411610	496500	3137530	83988.5	1137380	676505	2156390	305870	1005040
Cellvibrio	452828960	20497610	34054976	6463451	17189300	4358740500	207156300	33282408	409704930	9165.98	27224.1	3867780	1477700	25354176	967067	457872	337284	395340	1378160	667509	1460950	346418	612377	1530690	1809460	2035590	1305570	24632207	2087430	745972	329449	1121910	658216	808893
Centipeda	452072500	9140563	9719470	3587560	5464610	339326700	65459363	41226960	68545740	2454.65	35458.3	2494140	409891	99014.3	107456	45712.7	41377	13413	26800.5	244715	142056	252020	273022	252645	28463.9	211293	39821.4	104163	8409.83	124980	72934.6	362860	29412.3	79859
CAG_603	450139600	10785735	86161790	9672200	17773636	395341800	127797380	301033420	804144370	23331.3	47978.8	7698134	878934	77329.9	397877	83682	164949	69021.9	75482.1	555064	417907	637552	562746	388690	76673.9	525330	75522	128185	5505.96	234008	187875	600724	62959.4	287540
PHOS_HE28	448842969	25493900	14673100	16969000	19728900	378900505000	516396280	88012900	53784194600	20407	57149.9	4034650	8942780	965226	2559790	542406	396164	524716	1436450	925017	1289230	300282	660467	1143250	599220	4542710	936918	970725	112879	808687	965791	1787880	229680	955856
Trichlorobacter	447117400	101520860	13665302	40257726	16293000	1428136640	74412820	20755556	187635330	1012.99	49134.9	1934830	379275	57460.6	134700	177382	44401.7	19763.6	74886.7	172346	120860	174420	158308	124223	30764.4	91217.3	289649	3608367	37317.2	80128.5	48079.7	172940	32595	74919.5
Oribacterium	445640870	11010827	44764524	11098354	17061729	221534990	152817405	228085964	566418930	1326.68	59825.5	4591180	907810	80835.5	410684	119442	179792	27107.1	129187	449600	717717	587684	598935	1070970	65494.9	408957	198655	149639	5357.36	284149	233358	636167	134623	315383
Ramlibacter	445109670	83338050	11438914	12819373	20075826	12236155000	973300200	32494700	1250455600	358123	290646	6293010	2523780	2030490	1334490	455418	134789	209975	371787	1687250	1191930	228774	453340	686486	1520610	1667130	1162280	4288970	606359	510318	408123	1179750	272477	439334
UBA5734	444944870	4674938	20810847	30626221	77005454	504328700	24913830	40825030	42316620	2864.77	8089.37	1638738	144916	25633.9	218934	33325.1	16712.5	7879.38	12400.2	61961.3	58612.3	39370.4	54069.9	149052	19413.3	74418	287733	1955100	66061.6	35867.5	14182.7	68988.4	9761.11	39228.8
UBA2192	443880840	11890476	6318331	7867196	15791221	252829200	137563530	24552460	62107600	969.004	14706	701824	160374	25113.8	46439.3	35788.2	5260.73	18175.9	18359.6	264678	113438	71913.2	46573.2	112645	15414.9	100731	65182.3	84179.9	8878.37	82783	39448.5	110353	15185.4	50199.3
Pseudobutyrivibrio	443393120	13309627	71008264	11407300	10356000	662783340	163340529	305365760	804305770	4888.48	72491.8	7800200	1482610	97157.2	537168	175070	229912	58455.6	132033	860992	446374	672263	780287	845906	82940.6	812967	164347	153270	5446.95	298138	246519	834529	98262.3	360998
Azospira_A	442234700	159618600	4609790	9907550	26146190	8405265000	77602460	25730770	125803340	14369.8	11159.3	2057960	287289	1280270	53442.4	17440.3	8532.39	5070.67	17870.5	163419	91462.4	22730.2	25617.5	49196	112420	853962	354795	931892	59553.3	33858.3	22872.3	107289	20603.2	27829.9
Methanobacterium	441556920	6563020	7467352	9732708	16695038	390753310	114664740	33458161	481672710	199.079	22777.3	1886770	291505	90099.4	150962	117416	39905.3	57801.5	9680.9	304233	194224	294246	368398	237679	47343.6	380186	80630.8	185491	13622.1	175442	127188	441480	47141.8	125134
Massilia	441373470	107249328	13770400	12297100	19559600	8804306400	994121260	46153471	1275770080	119011	109352	4167130	2216560	6568850	1871920	510081	216541	298316	328534	1608150	1215720	372567	623617	877709	423855	2073040	742270	2671820	252928	624602	501033	1429720	311609	589317
RUG115	439628100	4494469	29412297	6373708	20236623	100698370	32183400	147153700	156451800	/	19772.6	10042797	170267	23523	53716.3	24996.4	31849.4	5382.73	21335.9	111559	79947.4	176244	128539	241524	8645.65	125441	23394.6	30068.1	8366.55	37166.6	44607.5	166947	25510.6	39059.8
UBA1306	438742000	9571050	30760	309224	675855	71935000	8477820	649159	4738200	/	1455.44	39176.7	8828.09	16757.5	4841.34	4391.29	967.782	2955.56	4187.69	21062.7	4986.42	4734.74	7250.28	12428.5	7873.23	9610.85	17211	43552.1	6583.71	2588.86	9735.91	47368.7	7380.17	3774.64
UBA5232	437850100	3833147	29743797	4466290	4413424	108857700	12822150	219469480	382917800	/	16764.7	4120909	365082	51693.3	55809.5	69206.2	53760.5	6037.63	50933.4	257391	238766	252071	285739	65159.9	66215.4	631075	243687	59472.6	/	135815	156140	446131	47664	195707
Quinella	437755784	22654600	46040400	11569500	7248649	910376120	222977243	202771526	1031092900	5754.7	131503	5606790	1680650	187710	696052	244397	373108	76421.6	181785	1005810	1256150	1165020	1578900	1259320	131354	889357	251253	244347	16831.9	539184	421530	1705440	226841	540473
UBA738	436577000	8241752	17877900	21468516	6120300	480238000	80180650	191603820	629661910	1778	31325.4	4085250	481461	64496.5	77523.2	32528.1	56937.4	9204.51	14127.9	226139	134509	206299	199358	157670	28257.8	173441	33295.3	167224	11517	91703	81633.7	273952	22532	68827.8
HUN007	436255520	5839330	114460706	10594924	18652105	174772400	55706346	158059450	403146720	4411.64	21634.3	3713784	545629	53962.6	144465	52707.4	91633.3	20293.3	39425.7	298384	250674	185466	231682	345368	22943.1	287368	28734.4	40690.3	2853.25	97709	98206.5	243317	35661.5	174163
Angelakisella	427773980	5511186	31735300	12924000	9585890	99655900	55231286	339456900	87354219	4647.6	26018.7	19195800	249415	49256.6	122065	4453.71	66923.2	1844.22	13598.9	147585	135555	133112	231678	220160	17863.6	83012	27670.2	71331.1	12485.5	79422.1	88787.3	512084	21320.4	110453
UBA7239	426255831	6437650	2305514	10948500	5265220	18552700000	431859135	6039497	109322310	255.613	19023.9	185351	166765	363506	49785.2	67523.1	18692.2	34166	31035	122824	51732.4	19656.9	55358.5	64851.8	383024	119765	231151	573093	87088.6	70469.3	20983.2	84994.4	25357	47515.2
Tepidimonas	425369900	33647930	17970200	275599399	47629463	1481321300	132519760	29523961	379897570	131685	26154.2	5776580	5037370	282731	329849	87466.6	37069	42620	85299.5	480948	234833	51095.7	137426	166811	91729.3	284419	183995	377682	113220	85278.1	78477	244523	40729.3	139401
UBA9959	425277880	82922163	2326800	1230070	2186570	298585330	85032853	9333702	92307037	362.237	21642.9	636123	264209	114521	112651	52831.4	46523.1	75715.4	53224.2	239348	231692	54866.8	109504	110874	65985.4	399815	291493	469936	18873.1	146868	124109	315578	49321.2	96544.8
CAG_303	423988780	21321059	134028380	14517700	12741700	596806300	386759130	459897100	837287600	3880.1	55906.1	11226600	1306500	104022	434786	274560	356361	137877	118181	893276	737546	1208430	1101290	2551170	88161	555523	89671	207710	8748.52	279415	268003	722424	150531	343280
Kluyvera	422854720	3834340	24732850	14818993	17383600	81455930	26938306	71096320	154546340	3477.81	38692.2	30837918	111532	56351.6	121154	31722.3	41972.8	41352.2	46592.2	74365.8	99865.1	35849.3	71303.1	79869.1	13850	145824	62650.9	166110	18878.3	80366.6	52883.2	130985	21546.1	101232
Metamycoplasma	422838700	37453715	142559970	26432600	11440771	581099700	259393770	490401500	3960362330	15427.6	184703	21354979	3800480	321292	1219830	446876	536100	213697	233611	2129990	1196050	1843220	2402610	1646310	219617	1155870	293527	387539	23442.3	773911	649226	1791530	329572	1437700
Azotobacter	422123200	3468048	8352113	3399275	3321292	224855600	25735120	8497601	22701470	4496.43	11235	3201526	83965	35305.4	145038	42305.3	9413.45	20700.7	38871.4	46357.1	53054.6	11708.8	38926.7	61289.4	14392.9	147452	36283.3	60557.8	3596.19	35620.7	22148	73990.5	14324.9	38526.1
Coprococcus	422057060	9950320	193861420	16928400	40545300	96611730	79544316	657036110	514568190	5480.82	86536.4	30026415	558398	60967.7	262640	50343.4	102978	39156.7	44505.8	306622	198067	309050	512944	489364	44357	385539	127638	134469	24044.3	166848	155519	446546	54479.8	184252
UBA3855	422054710	14686100	45914321	11851400	11599900	207776680	104226659	294897000	427684910	9457.71	59301.6	3677550	1120860	80454.7	376356	110329	139254	67658.6	61436.4	731014	402299	523130	729649	764447	61598.8	395961	114352	145467	8617.46	273782	279429	841930	73049.9	265786
Achromobacter	421566260	47203364	22470400	15466800	23722100	4709998000	518861340	50010700	761954088	87520.8	62062.7	6515320	5290110	732403	1089040	298255	119106	207354	222150	1175060	837916	202522	381778	540654	238956	1416060	422204	1307680	120727	382223	289716	775693	176968	365521
NK4A136	419818430	13822700	54749045	10509075	11207900	382710200	111378172	224943443	1010105890	377.982	58831.7	5095600	1401420	90150.9	492738	98163.7	217536	45089.7	99182.7	577783	436149	619349	666854	883287	62456.9	344301	158837	154809	4505.8	261292	232196	822247	104736	364877
CAG_115	418622830	12443500	31791970	11240800	11583001	184338600	130412265	162477535	651813740	2113.24	40066.3	4744230	1803590	105547	285750	110749	88644	68004.2	101330	646129	339793	455269	528652	568244	52904.3	376714	99763.1	182550	7487.94	205152	187981	680149	67679.1	204881
RZYX01	418071900	16903300	262243560	16868210	33101260	258606000	33104800	169507320	127697900	4315.88	13794.3	5246861	420857	81456.6	114593	19390.1	3718.33	5963.64	656.949	59340.5	51415.5	61818.9	81044.1	14771.8	13208.6	540364	56641.2	158972	1196.51	35102.9	38441.9	57096.1	12198.8	73333.4
Onthomonas	417215900	7317924	24770242	14114053	17517300	453357710	75860660	185661625	191133440	6917.62	47184.2	10181000	563992	47784.4	90962.8	32316.2	67650.2	21927.3	17558.9	348660	157556	205596	196690	330029	27100.8	213013	47333.6	133130	10223.7	112758	91328.2	305061	37190.7	93511.1
JACMJL01	416495000	3826160	3678820	1865540	533086	83484100	79469000	20290900	81640200	/	5031.57	542594	20160.7	17230.3	30655.4	22310	48855.7	15870.3	10661.4	146074	44032	98289	49276.3	31330.5	3092.26	35220.2	9423.44	8132.62	206.957	11929.2	8471.59	54289.3	11266.6	21302.2
Cruoricaptor	416445000	3632750	1784210	8284330	10040700	7672310	5902900	18539400	15969500	1678.66	2719.29	875284	7635.45	14211.5	52704.7	11635.9	6481.06	/	4371.5	14343.2	24048.7	3057.04	14830.5	7991.94	3542.83	10106.9	13841.2	30108.7	853.558	11264.6	11304.2	34851.6	5852.29	28939.3
Paludibaculum	415817600	15977735	1149390	869787	3027020	9369060000	1503282900	2765101	199941710	8441.71	9856.55	303588	296480	56002.3	66563	40216.2	19721.9	17843.5	28973.8	102491	88180	35864.5	53709.9	64763.5	48678.2	48965.6	131491	188721	23290.8	55578.8	34890.8	126029	21886.7	43379.8
Nitratidesulfovibrio	414408000	534379	21550700	13667600	8741100	75789800	4038950	28887300	29360200	649.06	5418.94	1520340	26371.6	16381.3	13216.2	16264	6888.35	/	691.287	/	16224.5	17116.2	5902.01	/	789.841	25551.7	6925.53	54104.5	297.928	2653.77	5252.72	18294.9	2095.68	1258.35
Halomonas	412059438	35751300	84797400	21014900	22920600	6932455120	586661280	206975000	1573802062	64676.4	112904	18993800	2097500	822833	4388600	1872500	1379740	1456720	2350130	3908180	2946910	774631	1592780	3109150	274634	4318750	1194180	1224220	82523.4	1681460	1417020	4716170	1138680	2130650
Limisoma	410728240	3410340	10524173	5373680	14193016	95781000	38265874	47573871	55551760	3948.49	12494.6	4401950	227779	76964.4	173516	26737.2	45744.5	23077	68050.9	153741	223299	46437.2	123583	148679	23872.3	274423	84362.3	225683	58788.6	121496	83257.4	214687	29956.5	108214
RUG572	410248060	3766560	2588220	4932140	1903990	282453300	51268866	8732640	56796697	70.5577	9604.85	279591	298649	69312.3	264944	78531	36325.9	45402	43283	99948	320098	55674.5	122296	102044	12367	274042	47711	194491	6366.36	119321	99328.5	333910	55555.9	102324
Flavipsychrobacter	409336498	57421298	26524200	9972190	12252600	17093469000	2976500060	78069700	3140559760	132460	123995	10945400	35811900	3149970	1875690	748992	352048	583681	551170	1484030	1556410	551464	1077300	872246	1162030	2652620	1557270	3555030	268737	988119	617272	1905720	264278	938458
Clostridium_S	409197190	7614730	25207000	4509064	5081762	33960790	78618015	105728450	765375570	967.022	19838.3	3827982	679066	30950.8	145471	57856.3	53828.1	19836.6	20878.9	330361	198692	260502	251636	266768	39808.5	155437	53712.9	94688.3	8244.53	98788.4	87386.4	201500	40052.2	128874
Caccocola	408764000	986268	1642385	3032860	1915500	/	8870225	6511236	3916979	715.87	6144.9	1110760	27849.7	16251.3	48097.2	25654.9	2589.99	3925.06	4010.22	31477.8	44653.8	22097.6	30306.6	31351.8	5869.81	22482.2	15627.7	207269	1325.59	17815.4	25946.6	82684	8838.15	21437.3
Eubacterium_F	408524859	14954500	79854061	17010884	28143100	401895600	152352015	418878141	1237888230	5782.11	74761.5	11936000	1329460	150579	379418	146229	143342	42398	100210	953897	493207	751049	770155	898737	72694	545968	125715	226341	7716.67	300319	253143	1114510	107851	300523
UBA2250	407665100	85898780	34104610	69780734	38006360	2031201500	146243770	27591582	434220670	31053.9	26650.7	2737420	769949	557652	357376	87797	36972.5	99380.7	61602.3	355898	258146	42257.1	117509	174694	149987	657625	867154	1313540	73174.5	102155	75182.3	274190	65696.7	143737
Mesosutterella	407393073	2454170	6335310	3106680	11289600	80894300	30165930	15906977	80548350	1926.12	8290.34	6859960	77027	18673.5	55493.3	15142.1	5040.54	22687.4	3876.94	194639	50945.1	3834.89	15987.9	28186.3	8992.57	9607.65	30322.3	54592.7	5960.36	15920.7	20795.5	37323.6	22388.3	38677.2
RUG592	406508210	11136890	48238165	11443700	7075360	560122590	145416610	179851590	523924810	1550.96	51546.7	5472960	916395	103822	528937	82066.9	169480	32607.4	48247	857406	495496	643534	692826	460791	78856.6	414079	87817.7	125221	3522.1	215249	182386	783306	64572.9	235213
UBA2009	404004000	25825981	6048483830	957770118	13575348	2137351350	156353101	4410360000	471319380	279067	1211750	936366520	1228470	168154	484902	338532	97965.7	79295.7	1491050	305280	226142	119117	140323	456469	45911	6687690	121266	117260	3834.42	101721	503649	1733590	200076	5104570
Agromyces	403243555	118760847	31284300	19259200	17277500	8679113500	2393061600	213118367	1945753830	29405.5	211552	4076750	7353860	279614	1142840	343003	316885	97917.9	170045	1903460	1247590	1083480	964248	1896340	363136	1627450	281154	1225430	77682.4	517533	417002	1130930	284155	524587
RUG14219	401433000	1140092	1625399	760465	1322754	/	3468290	6012210	65047700	/	9866.19	345347	9642.35	19364.4	198993	19189.5	31491.5	27573	18368.6	103822	100655	48776.4	41736.2	47243.2	5619.5	33502.6	60281.6	30718.4	1006.14	84549.3	28232.7	124956	23139.6	86751.3
Aerococcus	399524932	7621856	26212700	6707550	12658500	220037700	58058688	217068666	934862880	1180.34	50032.4	3645590	599305	72657.1	309591	107485	171216	33830	75776.8	533331	252186	401692	500208	301677	47488.6	312584	65324.3	82190.9	9589.29	199580	177096	493367	44551.3	192863
OLB10	399206160	6747466	7081694	26623180	2903570	15675045100	131036320	237692650	58992691400	14817.1	20094.8	4426720	4555120	101034	113826	57573.5	55883.4	50818.4	44055.8	114988	113815	60198.2	144014	71751.6	62705.8	532741	60954.1	149651	16601.5	109604	58341.7	176451	21130.3	90559.5
Reyranella	396774010	62426875	7744780	10167200	34175200	4305005770	1942637120	36884500	515346111	1208600	131972	6354660	7479270	3204100	1011460	293606	106575	190130	306884	1265750	1377200	721590	359772	1569980	1198720	4217590	1607720	3231550	1391250	1001750	338239	1096980	216837	1037700
F0540	395900000	9074655	21719533	3870840	2472986	58145300	160449840	66805720	321979610	2933.34	15549.8	2793600	399573	43514.7	58648.4	38195	104611	27545.9	28631.9	249259	169654	192505	177603	198102	18737	113487	113869	47735.1	1970.41	96451.9	65892.3	161102	34629.1	82506.9
Onthousia	395782310	18041780	80400810	18991874	17204670	222178000	87047920	437687730	1482240700	463.002	85314.4	24456915	1088740	90326.5	411957	180386	290490	57779.9	90113.1	588556	697580	909610	727136	1065950	102622	528579	143189	146022	7324.58	282585	236432	706972	108953	385976
Caccovivens	391714470	22017606	68383703	15594600	8459340	2111845200	190830970	216671220	1719112860	6429.34	74137.1	11330600	1901590	195094	708785	284125	417338	94970.3	142811	1368550	740835	1885390	1434770	1824100	128841	506338	207180	233080	10209.3	524818	447623	1245420	178521	528022
SSSZ01	391502420	56775434	7796800	12253303	23747000	4127078500	35163368	26490502	187538890	9463.79	7588.1	1984940	371435	387282	97347.2	77072.1	15854.8	50020.8	55755	83115.3	327766	63004.1	76673.3	154779	60742.2	606819	168869	381241	19908.4	97965.1	75768.4	183002	83486.3	45799.6
Luteolibacter	391127061	11703700	10218300	6712340	10252300	2498642320	228647460	18148900	441650820	2856.78	32266.5	1848070	1397400	305406	2590510	752661	422270	920587	324627	6816000	13116200	228720	3313170	846764	449144	967733	628847	2007150	136494	927167	961251	1822080	175620	1317950
Alpha_05	388515330	6637763	30141195	14848747	3446160	364915900	63208650	167020370	128806780	5020.56	21369.6	5299715	296226	52546.2	75953.2	26502.1	53034.8	78106.5	36042.4	92211.2	185169	30261.4	67535.2	112600	19005.7	398681	38163.7	157090	4930.02	91039.5	43600.8	121217	22487.2	116978
UBA12158	387456600	12394500	10454987	4568547	4038509	/	78039900	80690660	164452710	/	13284.4	1283860	443272	84658.1	700887	228861	291201	278370	51744	1500800	542483	787513	717927	515297	55999	1102690	2130530	102864	3209.09	277209	244594	671991	75270.4	547087
Fundidesulfovibrio	387291700	6260221	17954060	5820210	11445800	124502000	28991348	25768562	45844180	143.673	8240.65	1432522	131591	32966.8	61080.9	19226.9	10197.3	1968.43	13945.7	47548.5	56540.2	21439.9	36114.5	22120.8	21917.4	149677	48969.2	289257	9445.21	17960.4	15140.8	61587.2	4053.24	36061
Scatosoma	387271261	32121800	65864241	20438400	8873820	722838000	319050317	266940255	1053330680	5862.44	119067	8934610	2259940	224116	812564	280877	310976	103494	160325	1236850	1014210	1174390	1159550	1550610	131206	841018	307158	379998	7312.44	539831	523665	1446360	199053	654471
Polaromonas	387118960	53011057	14135500	28246836	46513947	4813185800	443474870	45773900	799615380	314141	65955.1	4427980	1838320	1602760	1012830	700005	175091	334060	533730	2301530	889170	249988	502369	644148	464542	1236160	756844	1448440	546819	470801	376931	1093600	241013	455574
UBA2918	386541760	3464633	10315042	4165530	4875070	317722020	40955383	65912650	229004510	738.974	10451.6	1379809	287746	79141	340582	104615	60661.6	84725.3	89439.3	195068	430710	103316	197496	181993	20728.6	307269	170987	103676	6419.32	274919	181336	433474	63000.9	160648
Chitinophaga	385808485	15956228	18913400	8359240	7282910	8021148790	501004170	68478800	1921742990	22990.3	76629.8	5020830	6108380	628015	1053620	657118	303186	435138	496175	1389720	1666940	480131	983053	1007790	433275	1300510	668282	1807460	143164	998152	639878	1761140	218716	797699
Undibacterium	385652030	109816502	11588068	8831110	80793339	2476337700	233463000	35392500	397304420	28909.2	41594.3	2625440	680713	16884900	906807	344313	147848	216162	376830	1323050	1060550	215989	420589	667677	989831	902534	643725	2155970	1451740	470899	336820	1138470	241071	513682
Terracidiphilus	385204310	169207190	4819270	2661930	2405610	2405646300	5191960600	11407900	191326613	11855.2	57301.8	982931	564183	161997	508079	259021	104613	138474	153311	477154	594829	168027	255016	545083	74518.8	431257	189825	411326	28120.2	311113	212682	792332	104101	226553
AC2028	384488243	12933303	40840910	9838160	8581560	241926080	118270005	169841926	459757690	2557.78	42668.1	2732490	1189230	93625	363151	129380	124802	49504.6	80254.9	502132	670445	721306	521605	493793	51207.5	480127	89345	100924	4021.07	211962	174566	733098	71714.5	229291
Tibeticola	384344000	7794340	4555720	6456800	10210240	380157000	27811720	9836200	191077600	202185	6733.54	1549460	228666	96827.9	49116.4	13924.3	5468.01	10700.1	25507.2	114474	39577	14663.4	27095.4	78708.6	20155.2	222559	43773.2	161632	20632.2	13206.3	13447	24038	3845.78	16043
Alishewanella	383157424	7698770	35416870	17176506	18452600	89544600	13810830	33658780	53896750	343.576	14534.4	7786840	183717	54957.7	200088	128259	35398.4	49360.3	188165	147487	165591	45789.8	62432.3	255327	17698	971923	104176	389182	14144.8	43003	60417.1	154092	68518.1	62130.8
UBA5550	382935800	7594322	16033073	4941918	8680237	/	7222491	10510400	52231640	929.132	5764.66	1563590	53726.4	35965.3	32045.1	52673.2	24223.4	13734.2	54256.9	80216	64490.5	35196.4	59921.7	51171.3	5177.35	83318.4	65421.9	236613	4551.28	31831	29453	85228.7	19609.3	31501.4
MR_S7	382595000	10708300	1748400	7196040	12492200	308321000	27679500	12212000	58759000	9035.09	2794.57	1463050	2852210	67390.7	10392.3	9625.96	1883.15	3833.21	6130.18	27032.4	5839.24	13028.8	10381	17933.5	14766.9	47131.9	24306.9	99002	17573.9	10665.5	6202.41	11334.7	2730.89	11842.9
Lentilactobacillus	381289436	11031500	23626390	9011110	21189700	205024650	79718202	238950255	557126090	1657.47	49080.6	4253890	1067700	68254.2	287714	113140	84308.1	30475.9	64391.2	531097	353733	603913	446011	499286	60880	387935	63869.9	102617	7929.7	220764	187953	729599	75967.5	211732
CAG_590	380165930	20470675	88465683	11762146	13234500	337139740	91117734	290766420	648154480	8130.12	51055.2	8663780	1361510	334126	424575	148780	189000	56714.8	78398.9	1005740	525650	698235	607421	827310	76948	397088	165699	149169	9255.91	281883	223790	905722	76366.5	364866
RUG13038	377127000	21820457	107035580	21412886	5543422	381752900	141449530	395994100	1665566100	6884.58	88504.6	20371141	1475543	114179	605270	207861	253658	51724.8	111772	971791	680399	1167060	1232780	1285210	123134	809324	257552	253550	5553.66	455073	393140	812125	168224	879008
Firm_16	377061080	14207261	18713200	10652700	6461840	205693700	105438782	91892897	428007520	3010.74	31832.2	2063680	627780	83090.7	185501	98812	100769	41655	72279.5	446728	281251	466546	427354	483334	48954.1	437513	113212	112732	4293.72	245517	158170	677266	62196	261681
UBA6448	377037200	13656373	69814366	15372586	10192442	48191200	160495617	266318580	1190595690	3461.03	49561.8	10035600	890959	99815.7	513920	204206	337739	88847.7	99691.8	1173260	469475	576371	732710	941820	44966.5	470070	190058	106773	12569.8	187116	354452	551532	135449	200472
Aromatoleum	376541120	42178998	20364018	18066429	20535609	1902622000	168957890	46391400	1347356800	6693.77	37335	7122933	1531730	183241	344256	154327	37497.7	84571.1	155682	405391	449259	131195	177432	524531	78198.3	606574	239162	420868	46676.3	158581	127241	307330	92860.3	147994
UBA472	375990700	14430617	1428210	5528850	11052304	356807300	14360023	5459058	139973270	/	3335.6	93278.7	120400	13379.9	137062	10769.9	19365.7	/	19579.6	122713	44748.2	41505.1	40740.6	75295.9	5927.34	97593.8	46611.6	435942	6922.56	32127.5	42595	133138	16218.7	37727.7
RUG841	375547000	3167460	5683230	961783	1963516	6692570	19651297	9598859	95978440	/	7830.87	833242	81713.5	39796.7	168336	127593	25298.8	14060.5	56300.9	204857	138420	94065.5	118599	256656	11133.8	57703.9	30110.3	102232	4200.19	144513	77386.4	213957	28223.2	61326.1
Aphodocola	373179500	13485814	56175060	9904540	8531977	81867900	116000740	295789320	1012343400	577.764	59818.5	9321304	950148	99396.9	610071	503896	472678	193174	203496	672623	284320	1426290	769503	1023080	67793.6	447495	139988	150343	5886.3	316170	280423	593960	117814	320804
Extensimonas	372494510	22262710	6448737	19513966	38130079	466062000	51543560	17777399	164904660	14795.4	8654.62	2993725	1944810	89147.2	16766.2	10798.1	2560.45	20390	13898.7	134366	85426.6	18778	17942.2	20099.6	33230.6	205083	53794.5	195386	22767.4	19409.4	20766.6	80748.9	12661.9	21399.9
Polaribacter	372398170	22316954	67939952	20010398	11615300	1831751950	192861891	243733570	2120204200	13563	103840	23803200	2275060	852102	43098400	3091060	2834000	4505690	4565950	3784240	6427000	1852010	3708500	8507370	316715	9654890	10642200	623634	103714	3862950	4481810	4633180	1287390	4603880
Bact_11	371502995	7238620	14820800	6026300	6875510	619977150	115276731	61443503	457694188	960.524	28168	2051460	1404670	152143	650283	214053	200626	169215	142596	583395	577855	253010	435504	610384	39630.1	611201	215906	226766	13496.6	337652	311544	830760	112656	383405
Flavonifractor	370391370	7290135	17977600	8223628	20758844	306244400	47861829	160929720	114502200	2972.03	30635.5	9256840	256523	24227.4	65528.6	17537	35100.1	9711.23	22949.2	104732	134780	159910	125253	219331	27268.3	104533	67195.7	116245	11458.4	61493.8	42287.8	345883	20367.4	98100.9
Sulfurospirillum_A	368725940	15282500	1597803110	219960544	19874188	906643200	107047460	5109852400	469035473	44457.7	365460	495354690	663246	127973	175620	136772	73200	77841	106326	133510	229317	123982	316317	209092	25429.2	1345000	163796	147706	4822.57	155767	116618	391487	51311.6	134036
Ancrocorticia	368476300	4647060	54080505	45103900	73836970	357730000	19577980	839321000	182229890	3805.99	33994.2	5212931	412261	20833.1	/	7517.21	13271	20725.8	6972.31	55995.5	174428	67646.3	37170.8	120945	10977.5	94681.2	4927.87	126847	14307.8	10646.5	20324.9	56157.1	6243.36	19644
JJ008	367755082	50878955	18208100	8577380	17910800	122803352100	1918300890	63396942	1784727340	25963.8	126607	3544192	5216990	1338060	868093	497198	204060	341073	285537	2079290	1256900	444812	737605	761436	876503	1618580	1032530	2936740	371025	703454	486781	1505240	220863	587411
JACABE01	367099900	13823220	8072020	3074100	13122781	348790500	30602980	18676023	208434900	407.223	8300.09	1255114	205809	110034	173884	133115	82000.4	96944.2	109640	165920	177913	75325.2	187570	224248	39690.1	176678	95286.7	277831	12002	98879.6	91463.4	211728	35343.1	106618
Phocaeicola_A	367072710	3936910	8749200	4412970	7020820	490021510	35386938	100038160	166870780	317.813	20036.3	2265670	174195	43755.6	308054	110881	36567	96471.2	97962.6	242849	301776	94309.1	227315	205357	32447	198062	183344	96700.9	13165.1	161088	195665	373568	78263.2	131366
UBA636	366971540	18930900	52620060	15069000	10785400	150185880	126632402	294482712	902222430	4973.92	126932	7739480	1396780	137438	653851	193556	233177	59918.6	189400	1432010	800456	916894	1048110	1091470	101829	1049260	159325	184398	8614.79	404575	400267	1072100	157205	404492
UBA4345	366293900	1037484	1461650	1577677	6950850	37528760	4258386	8791445	18495400	2154.95	3001.34	325975	101140	48585.6	78835.1	14158.7	15058.9	19970.8	7217.27	14899.7	51222.2	24922.9	50317.6	22538.9	5185.72	85515.3	16599.1	19473.9	1359.77	35303.5	28897.6	89520.9	17167.8	43893.8
Ruminiclostridium_D	365221800	1352179	3630240	1473703	1269792	/	14279330	10932860	22483200	1085.55	4533.23	124724	146642	12348.9	34235.2	15396.8	22069.1	6075.88	16669.1	23867.7	10570	32182	27862.9	8220.89	3319.55	37903.8	16918.4	40710.8	2891.87	19452	16334	38100	4317.24	20104.5
Mucilaginibacter	365194823	24876500	32574900	11146400	9903450	7280230810	623285258	110160757	1577639260	32866.5	153931	7236790	4521720	875377	1816590	723955	446017	710152	678644	1834230	2568580	843022	1550230	1563180	406851	1799490	1050170	2724180	165000	1455260	844445	2545340	409314	1381730
Methylocystis	362129794	33959500	4034920	5196420	11440300	9767839600	1141459330	17896900	703696042	14654.1	129662	1206160	927944	292291	536590	181829	127094	192718	127840	660861	485650	130624	257018	305612	311146	967431	814033	1163450	179725	328065	229674	759801	90911.2	287939
JAAYUI01	361790174	2840735	6653890	3709023	4993375	203781500	10920640	33482890	46194300	8343.23	17554.9	1229600	56423.1	19527.7	28049.5	4946.42	3523.53	12009.7	8142.87	33103.3	31480.3	39681.9	52090.3	73648.1	9152.76	67015.8	33472.1	59367.2	/	29946.7	26608.3	88447.5	12775.7	44144.7
Methanofastidiosum	361605840	10852989	14924000	6891080	3630420	300242000	35123967	41315020	402410200	576.688	15994.4	2804156	394784	105050	226535	44615.2	98059.4	38676.1	11542.8	212075	203976	161789	298667	194543	11875.6	191924	76825	77525.4	1817.18	129321	96872	292086	40441	127012
Sulfuritalea	360684600	73596890	11562294	13554696	20684266	7805531000	218418010	30129965	430672700	16199.6	36219.5	2201300	960162	813744	594110	216477	84171.8	176666	154783	647211	422276	82486.8	223810	229798	347077	809710	777179	1865000	132556	184566	152260	650059	72338.8	194169
Thiothrix	359532500	8268113	33440699	390836440	320171600	1391110300	56902090	85590240	11311895000	39184.4	233081	106460270	27479181	346023	239854	91447.5	103192	930306	140670	295553	214019	79844.2	151742	229991	34493.7	841624	161200	215809	30509.8	127959	121624	596889	49893.7	177126
Arenimonas	358628929	12395200	26641083	8435699	14307400	2931129200	281078320	28039596	538934100	42437.5	138466	32645100	2154340	1438460	592134	278998	80281.2	121187	160396	517548	350031	79354.9	198085	252476	551324	1422740	952246	1197760	168776	198573	152450	507329	92747.4	232232
UMGS1696	358159960	15684400	41932090	11902700	7449680	916337890	178469045	148710842	566203452	6107.57	71760.5	5973360	1216860	86196.9	524086	120170	152846	38007.1	78469.8	822862	516355	622378	645656	789061	84123.6	368842	160871	181176	3820.17	283454	211260	784561	101078	358867
Dolosicoccus	357031000	371831	4186680	1289900	461015	23382600	742908	31926400	3644260	534.872	13573.3	425307	9747.26	2667.84	42624.7	18076.7	19657.4	/	/	26811.3	5079.71	17053.6	38684.9	7096.9	5729.76	68964.6	7875.61	6916.03	165.151	9379.79	2801.45	54005	1269.46	10888
CAG_274	357019580	7570288	42555220	6802410	29644400	14869300	18600850	318941774	174589100	4886.34	59848.1	18330465	131782	7663.4	73629.2	31528.5	23560.9	22085.7	1478.68	110866	44525.7	96204.5	67892.2	70962.7	7144.54	96263.6	23784.4	23860.9	12382.9	76894.7	47490.3	94357	14155.5	42266.9
Dorea	355933000	1620270	33644000	7685360	52163700	56375400	8289910	346461000	9168610	11809.3	54457.4	19560200	37493.9	6656	32009.2	5334.97	11661.8	1600.53	8982.69	/	21697.3	48745.2	32569.6	4805.18	4627.02	53449.1	6331.33	30437.6	34680.1	6477.44	13234.5	5293.53	5854.91	7230.66
UMGS1668	355433920	10851600	31609018	31490800	6319660	212134800	96759701	154894557	419543980	5501.24	49639.5	4272200	745463	70236.9	329183	180324	225021	118422	141596	612806	293671	563005	643576	524615	43556.5	536630	327219	113727	5964.61	146543	146325	484431	68765.1	206984
UMGS1865	354963985	17198400	30558397	10731000	4164940	391174530	224988667	147476660	598103480	5316.29	75303.2	3559684	1511600	121265	543750	145659	156944	63897.8	106809	709882	514426	676552	700101	752932	78751.8	611026	129673	216509	10266.2	254021	260088	883267	110402	233068
Muricomes	354545100	6094690	32392460	8757728	17365118	207778460	30705890	237950190	216845980	6338.33	23664.6	5811148	269433	41682.1	164912	204014	50780.7	14582.6	38432.3	2024930	133884	248275	215796	404851	29840.6	214133	37109.9	101302	5012.51	87862.1	74564.1	217913	30169.6	81619
Propionispira	354381700	2682130	4301070	1611775	4020950	17007800	18868950	26945630	93351370	185.955	12123.2	1307116	178980	12848.4	42511.6	18080.6	3677.45	2048.01	6681.25	58877.6	38361.2	26482.6	64084.5	47744.6	4780.76	35498.3	12423.4	52506.1	3516.91	27551.9	17849.5	56513.7	3959.98	16933
UBA6183	354012900	57189647	2024174	1627900	16444000	332916800	10143450	7989971	642450600	2099.08	7969.47	788191	482240	179218	55819.8	32479.1	11005.4	28074.6	35404	62004.1	64395.5	36861.3	58017.8	46603.1	94423.2	127841	206516	574154	24750.8	75556.7	34206.6	91340.3	11298.1	63001
Acidoferrum	350863170	998983360	5997580	5300800	4207710	2317569960	93882436000	20210900	201648530	27459.3	147173	3167420	461841	142394	386342	90915.7	110148	72905.6	61134.7	408560	306769	100541	167338	267203	46390.4	189475	123616	303266	34794.5	196657	152299	525939	54523.6	133861
Afipia	349808870	19261375	19739900	15801200	77713800	4133658200	544486700	14155600	953624220	459471	50723.1	1158690	1133660	585160	1058800	101055	544850	94199.1	132752	595527	365689	98117.8	203097	428919	157785	457756	189516	573300	110005	180952	111877	384717	88086.4	175886
Gemmata	349735700	47499487	2798840	4387930	7863288	39576410000	7955626000	12354267	451387500	58436.8	94180.6	2244180	3378690	444739	714706	127633	105860	57432.3	78212.1	321342	227918	129790	129644	312442	484327	601911	400869	1727810	730458	194456	95138.9	331242	76799.3	289040
UBA1573	348443470	101369920	20056099	27303810	39792590	751811300	43282505	81035578	18227819000	3712.45	35305.2	16535134	71249003	403523	244895	69029.6	85267.7	96920.3	110178	210257	200440	106974	137183	106788	132255	684199	224287	1385240	65382.5	136688	100152	377417	50750.5	146936
Enterococcus_A	347761220	12264693	40733191	12465966	15387900	471728150	78389864	358010740	702635100	1854.85	57677.3	6869270	1059050	93224.5	264617	133237	187285	83591.1	108762	712150	342067	565450	665607	638711	53019.8	369459	120080	138345	5374.4	243351	193356	590359	62859.4	250200
Clostridium_AR	346333000	7879887	32130470	4001291	2802006	126024400	76314030	88259410	483451100	2629.06	30349.5	3054461	342685	48831.9	203904	69338.8	95647	40511.8	40324.1	342374	158947	360273	378195	340993	39575	188233	59601.7	76016.2	3487.91	102687	91117.6	331892	36634.4	145378
WRJS01	345552270	2465430	1152260	2351654	1405700	141563500	7831847	2750199	9654921	/	3146.46	95801.4	20448.3	10179.3	37632.9	18862.4	6774.51	/	5555.13	15053	36953	4554.3	32038.9	20978.4	2711.18	20024.9	22998.9	172911	1652.5	22847.2	15933.5	56779.6	6234.06	9472.22
Shewanella	345443785	18012800	267461133	107075000	24518300	980914380	220258000	1436104242	998850872	44893.2	239633	215558000	1434410	661194	2630140	1324070	648589	805637	2576070	1956770	2515750	827174	1388370	2242260	243936	3034410	2533430	674254	74387.7	1428980	1017460	2536130	776598	1576240
Amycolatopsis	343051430	199932443	29771600	20524800	13212500	19266525400	3388707200	182667318	3893749800	42906.9	299882	5687020	10976000	496842	2277870	490369	451665	149354	321932	2615900	1592740	1286090	1384280	2439860	538251	2681040	385829	1701010	115049	634076	695866	1730800	412028	835290
Lentimicrobium	342763190	18694243	80091870	20066790	14478000	1949159200	79789800	140209390	718237450	1646.19	21912	3692200	1110010	145238	331007	178495	79478.9	115582	137308	317331	397600	135454	212150	317324	45602.4	696157	211817	323481	19266.5	217103	135186	412811	72226	264899
UMGS1585	342431100	2858080	2887456	1120120	3782899	/	4973768	16257660	78384300	/	4809.44	1017305	50436.2	39161.2	1974.67	8205.68	23162.2	14814.6	30707.6	59029.4	46491.8	12535.5	49270.6	16781.5	4979.27	73414.6	27046.1	28333.9	4485.79	42984.7	28550	90624.2	12274.2	24399.4
UBA1259	341860930	26937600	82575672	25582700	10742400	201546700	292264830	315994250	2066927470	4719.69	129030	9092890	2787200	193139	821878	469472	422810	154106	261170	1711170	990148	1276550	1485420	1399430	170070	1253450	451862	353603	7674.9	535667	484308	1514050	167427	774490
Merdisoma	341362670	7355296	56206107	10143589	18437000	165714700	84758840	211841290	258818750	2724.31	48501.3	10525200	374335	64541.9	285985	62674.6	48985	7184.59	35787.9	218448	197454	282795	413187	176028	46334	160558	54922.6	93118.7	8837.66	133230	109616	406568	38820.5	160449
RPRC01	341083160	9913834	12575569	27021715	4728590	473717000	16759580	22681520	75775690	/	6615.89	524591	147078	18617.4	51673.7	16870.5	16745	10382.6	4075.55	75832.7	128232	78243.5	54936.3	68581	12888.8	82800.9	49840.1	608221	8450.58	62922.2	25572.4	120532	11696.9	34531.4
AG_337_I02	340989508	22812200	56664200	14278100	12530000	1177926610	274702552	154768671	2497336807	17470.3	160381	17915100	1719300	805367	24230400	4749130	6829710	9367110	13130400	5480310	25828600	6244730	14515900	56403100	256812	3860300	6377100	626375	47751.8	14521700	20763200	17712700	7610800	28738700
Companilactobacillus	339700792	21328200	62547295	15952089	10725800	551709960	207465210	333372526	2356083170	6835.13	92090.1	10290400	2287910	175219	826292	349809	530256	134218	160737	1933530	777548	1380470	1494110	1764160	113117	903990	233186	235423	15910.5	485909	455570	1747580	207939	589381
JAGPIS01	339102000	6915880	1195810000	82702300	2825180	318597000	22877000	3445910000	230885000	11151.5	51894.7	29457200	123159	8120.02	15551.3	1643.98	12977.7	18529.6	5943.04	13064.5	13068.5	14666.1	17086.5	5375.82	6729.95	214116	6782.38	13503	1385.52	24736.5	8277.06	22509	2835.01	15872.5
Paramuribaculum	338887211	4686100	9949460	4221080	3989320	488854220	100210890	40497871	289376868	4832.3	26821.7	2255270	804000	143316	497763	242178	107087	236409	233893	629911	877113	244185	363458	738358	61174.5	589449	254512	168425	12503.3	345594	272614	744342	120821	310254
UMGS1071	336855700	4144024	31012899	5408430	7602911	124010000	37124490	124131560	364323960	3141.39	19894.7	8521740	394909	34225.4	255789	43930.8	54042.1	8835.41	14843.1	94142.8	93250.2	197278	233113	149631	22466.9	289722	11142.2	41476.2	4635.46	49762.7	37885.6	194542	24458.5	70411.7
Onthovivens	334091010	19602859	112453190	270905460	11991100	145535500	105550140	4130850000	1786229000	3851.8	90405.8	19871372	2247900	184876	362262	121361	345673	98508	89279.6	1031090	602914	886923	1064050	821093	68865.6	807381	234427	195036	6329.45	304995	372297	1048400	134028	571257
UBA1545	333686000	50541070	2159666	5538251	14424731	/	18230570	12608140	127729800	/	10949.7	518420	106992	392369	177856	21280.5	6157.42	3723.4	12750.4	20713.5	103182	48268.6	52670.7	29608.2	65865.7	94150.8	72623.1	201726	38742.4	43265.9	29915.9	89806.6	12623.8	25848.7
Choladousia	330889940	7412332	32076517	9994960	26589600	218154450	118524030	241434210	517431620	2021.04	57277.3	11985100	467560	38467.6	142076	45399.7	34438.9	10933.9	47164.5	286562	172609	130887	202585	273260	30086.9	157883	54989.8	135384	21267.7	85970.6	71764.2	236143	42409.1	164562
UBA1426	330533500	2351488	4031700	7224800	1820663	141693000	11487810	26690900	37094900	1614.74	8674.5	664349	272932	4701.59	27551.6	2821.89	10481.4	10961.5	/	/	11769.8	42988.6	41765.4	94572.8	1382.31	26034.1	17893.1	66842.4	/	20413.3	22218.7	37783.9	3419.47	12189.9
GCA_002841655	330146400	9949167	16277203	3942171	7010663	151848000	17958330	55158310	283638500	/	12894.5	2235280	496997	135046	26160.8	40276.5	211267	12340.4	22952.2	281942	61724.7	139102	122151	124419	20801.8	260882	261749	603596	1455.71	137356	39255.9	153682	13356.7	58683.4
RGIG8773	329986600	3582540	23985485	7558624	9225590	191327200	24637078	57896875	213155940	/	20986	1607750	495800	41818	234670	16756.8	50937.7	19535.7	115431	211921	124234	123969	255609	275648	20990.1	428967	65580.7	55849.6	5726.42	115271	53501.1	231436	45093.6	102966
Kineothrix	329430290	7174940	41865694	7321378	10836184	416453830	122585239	172076510	380924500	5684.16	40423.5	3481560	949662	133187	267399	176545	171887	62152.2	64860.9	334605	333572	490392	409804	426400	39239.6	336432	84620.9	103172	7343.82	172118	161724	451925	77281.7	257677
Butyricicoccus	328507970	9074670	34469591	6738030	11546000	348295800	79162824	90325945	360183218	3931.24	48948.3	4066570	366879	67801.9	293858	159295	120752	76598.3	86773.8	510935	632727	352235	435898	396964	39758.1	569757	87098.9	99653.6	4567.55	139827	126996	342866	37979	214294
Devosia	327820760	14522500	8535990	6696930	6138790	2558303730	372035760	38928635	600979122	72137.9	62931.2	2361820	1365160	329107	851444	414876	149749	215474	372736	930328	880241	248761	413735	480346	166929	1222740	427616	4049040	220277	454397	342912	1132650	234543	412299
Merdicola	327513250	12360058	45972480	9265736	14431812	243579900	75045440	243078820	1154366200	/	47479.5	9025162	859923	76800	247098	110860	211489	48009.4	28969.6	863985	419318	688802	640205	900833	83536.4	281331	121479	120467	7880.51	195635	224357	428574	97186	276258
Amaricoccus	327197780	8435312	32829112	36492534	57335629	1586617600	186299320	280774460	234751070	25402.5	75631.5	14187693	340165	178203	578639	141142	53873.2	124848	86714.2	323808	166341	62574.4	112543	157441	191211	386892	649281	613764	112846	140322	78629.8	238288	62040.2	123054
JAAYCT01	327099600	6124740	2901954	1358077	5474826	/	6009220	19676390	52649080	12609.7	4992.57	374713	66551.4	20736.7	4210.36	4827.81	36375.6	5903.54	6221.33	100092	26554.1	75612.8	37242.5	84035.7	11836	152069	12028.9	27785.8	/	16597.4	17510.3	48584.8	10777.1	5351.7
Devosia_A	326638190	15207582	3793650	3191010	4720260	5309024100	521923300	11298364	582654390	176105	64962.5	3948390	1590160	565739	410437	232407	48382.6	77490.7	143367	491038	367321	105492	156755	266258	224070	568915	287498	1829960	247492	245395	127455	354532	61493.7	201619
Sporobacter	325375730	5973508	6813849	11068212	3773274	151424300	30918697	63310750	40270800	1126.74	10249.8	937837	161097	23049.5	61125.8	17919	39922.3	17915.1	10257.2	33474.1	58010.2	104296	135458	127699	21144.3	71368.6	28028.7	133731	4784.92	31265.8	35107.1	155460	13607.7	38012.9
Methanobacterium_A	325048610	9154396	10485870	7388047	12832900	481580520	163201070	59173220	400945130	330.45	35886.6	2130810	279295	73633.8	267981	32139	74488.1	48356.1	24681.9	338043	239281	267111	338740	235636	39528.6	177099	89837.1	156152	8916.39	152446	119765	361645	48675.6	152949
Scybalousia	324036000	6823016	34918667	5561154	2808485	17356400	42087050	112805910	761003100	/	56690.1	4667060	515765	41137.2	260032	86578.9	337245	107162	44592.4	339767	177000	640760	193051	374397	40707.5	88748.7	156279	50743	1477.59	144617	107843	311650	47703.8	234559
79_D21	322837700	2103470	1525270	13718870	6576110	59114700	7555463	6037288	26728860	/	3394.55	389740	60866.8	20619.2	79527	22988	794.542	17090.4	13712	18123.4	91962.1	20574.5	30767.4	6358.67	963.626	144466	11270.3	111274	1958.38	17867.1	19035.2	82462.9	7311.68	19778
Rhodoplanes	322552530	22449477	3792080	3334920	8271190	16490485600	1425275900	25958196	177445020	23158.8	73075.9	1337700	313180	142116	184754	77163	19753.5	57993.8	43398.1	208213	135886	45761.7	73655.6	82157.8	197010	2798730	128290	661136	47982.9	88093.5	61666.4	217271	46180.7	68030.1
CAG_353	322493570	5867916	32788632	9337020	9008700	90500000	44814589	89669190	238660816	/	25512	2358990	481345	90582.4	117185	73996.9	119318	9633.08	48312.4	177945	273445	276255	273431	319557	24245.8	248060	37006.2	112788	6470.38	130358	124563	352165	31640	130152
Lactococcus	322453090	14376246	56601538	15834261	26157700	961848880	77175820	566878330	764793000	6126.7	88743.4	15644700	865802	115637	365689	201793	77083.7	64063.2	155823	1071940	501943	767804	735924	679595	244946	445605	169608	279695	48086	316361	233509	664158	127406	290186
Stomatobaculum	321156100	2561720	5560272	4240910	7100484	101862750	45845885	90505566	118637970	/	14418.3	1490250	180305	29981.7	305364	36464.4	27952.6	66204.1	11202.7	42574.5	148885	147637	216371	148052	10526.5	124387	38355	62784.4	1926.3	137060	158926	230370	40824.7	145813
UBA6164	320922000	9499870	146486000	9681880	21337400	46271900	6385680	224045000	96605600	5042.33	50687.4	44778300	53457.8	86205.1	21630.1	3801.31	20500.8	/	8031.89	64693.5	73920.2	87002	100181	128716	7492.09	303401	96821.4	86684.6	3797.98	22954.4	27536.9	54255	20736.2	40722.8
Syntrophomonas_A	320893046	1844604	4939300	1011154	901510	50591100	12603270	4797040	21072600	1157.42	6880.07	271469	74337.9	21815.1	24269.7	1919.32	13528.5	462.646	8067	5293.14	35864.2	29368.9	48365.5	30375.5	2169.63	11042.9	9552.77	22304	469.079	7088.73	5989.36	40577.2	3747.1	19246.1
1XD42_69	320692850	6287888	40845192	7900830	12816000	168153600	91446920	194944656	417441240	2192.77	48065.2	6366720	804702	52028.3	218204	76645.9	130201	19024.4	58686.1	426807	302165	381286	385903	517777	30651.8	311362	64927.8	90329.2	6424.38	212560	126505	355763	54058.4	211734
GCA_900199385	319890450	17022392	16054862	9236040	4481490	580449160	144160867	85255984	404871346	4973.81	46450.4	2317400	964477	50114.6	197185	105863	72052.7	25117.5	34806.4	390492	310369	336526	401492	424922	34540.4	270542	71525.4	114874	4068.63	140883	147569	519212	49539.6	172525
Pelomonas	319449000	99736520	6456759	6989135	19000998	10446917000	321931200	30160803	535363500	39554000	47355.1	2978750	1601630	3017900	499353	159723	81441.4	69629.1	90648.3	456625	386186	147797	312555	363558	2884150	1179040	1937890	29213190	4533870	446071	216779	1115250	129989	302083
UBA6211	317971620	23498581	367921510	78804186	25014450	355181300	20363810	233379230	168802850	12711.6	168126	194021760	271090	156924	46552.4	38437	29959.5	34469.1	86711.4	119853	215042	42467.2	101631	83259.1	19161.3	1539720	146225	312527	7415.13	131978	71438.4	186786	25241.9	122359
UBA1425	317521460	4917342	7319736	5881457	3066830	188446120	53929920	42196320	100042900	2399.73	9785.52	2115390	178992	27137.9	122796	30985.3	59294.4	8621.51	29320.7	170593	112866	225305	138446	181405	19673.6	158332	29194.8	74603.9	3006.88	43997.1	31088.7	187228	15403.1	42196.5
Desnuesiella	317341000	1567080	4571220	1847920	376770	/	10654400	16347300	90660800	/	6616.46	859876	81407.3	13491.4	25157.4	46341.7	1619.03	3905.94	15435.8	57527	25683.2	53158.3	79113.6	44256.4	3846.31	20052.1	31627.4	4240.95	/	20766	16100.9	45935.4	12424.3	18938
MWCU01	317205000	2737210	4258940	11346200	5262760	14086300	4126650	52022600	1107470	/	2220.28	471952	/	14157.8	10405.5	987.034	/	8654.82	/	25189.7	8030.85	6380.52	8146.32	/	1114.16	147392	449.418	27683.5	711.424	9278.63	6855.97	23117.2	7095.17	5139.83
Anaerococcus	316334680	21084664	104173830	17000485	10634600	570328300	177159769	352807980	2436809230	2086.17	92843.6	12675000	2181480	196144	744974	341977	552448	168369	190877	1451360	884684	1272970	1396320	1245770	130978	671057	188380	209144	11249.5	421067	409445	1372050	166812	575238
Coproplasma	316272202	27437700	53198084	14770700	5223760	958834300	249670426	210406021	727905720	9674.56	83642.1	7422910	1464760	182499	929797	149777	392796	143376	107587	1045790	810143	875378	1227780	1455490	98362.7	709966	180877	416430	10501.3	376878	442994	1128700	180282	360786
Alcaligenes	315223020	3874436	3123430	2267540	4168090	366773450	37927580	8176991	72395750	709.739	7101.66	1176910	146851	122828	90452.5	43716.3	21535.5	31082.6	53622	251859	112123	20053.9	83508.1	122877	23191.4	122777	50998.8	132652	13311.6	81216.5	44046.9	183623	34332.9	68813.6
JAAFHB01	315199610	18052819	19599744	5869688	11494733	405917620	56797980	45749691	233645350	163.015	15095.5	1530850	332428	148946	304645	130282	88814.3	88484.7	79548	193187	329073	128621	222594	174539	58835.5	253292	162435	235023	15853.5	208497	120901	340200	45308.4	185344
Mycoplasmopsis_A	313823020	40768243	140496274	31757400	12252200	440824800	268361797	444763830	3384682600	/	167570	29737123	2795800	293151	1850150	499440	599756	202545	303423	1696910	1438630	1964620	2852200	2179240	263518	1644490	344904	541346	35063.1	855356	700482	2237810	323458	778510
UBA11452	313143770	2286103	5529746	16699000	3371555	56931450	7713407	35232386	45343680	431.07	5191.02	2400210	257860	38728	67504.3	15423.7	1142.69	23386	12503.1	38562.8	54095.1	23138.1	31516.6	25152.1	15076.4	120560	61882.9	874759	14363.8	31915.5	27079.2	141573	9203.32	32008.7
UBA1179	312571520	5367850	13528300	4931760	4855000	563549780	60878064	64046276	247684297	2058.04	19316.6	1806860	471963	131267	401288	176551	108093	185775	134561	445832	502265	114841	347226	465633	42604.3	633156	252555	201932	9975.7	319714	231236	671075	86718.2	261648
Anaeroglobus	312517700	2853427	5223393	3811436	5025578	/	21929347	43528340	13128380	2531.77	8123.47	511430	46215.7	12913.9	21987	6042.02	48130.3	5579.94	18195.1	61861.2	35323.4	83003.5	135710	81632.1	2072.34	60595.6	6315.5	31235.4	5245.19	88759.5	16346.9	112546	12473.5	52034.5
Marinobacter	312460851	25597852	344760010	43584000	14717900	2386467070	375050000	333042543	967481128	27843.3	154781	76906900	2536330	587215	5696920	2344340	1014780	1633770	4538850	3957970	1939820	859313	1461560	2959630	164991	4990130	1054090	794293	57640.8	1300400	1921080	3839070	1788340	2471690
Burkholderia	310070035	50495178	9626420	8372690	15314600	6976802720	802454450	28489500	910686890	221097	91286.3	3326870	2194410	649219	1315390	431782	175933	280039	355845	1087370	1107140	239202	465219	710484	250016	1290980	498960	1576290	103335	638938	398679	1015630	232106	754225
HGM12713	309487120	13155900	38808800	12454400	6469070	276532160	142099069	201971544	479218540	/	50900.2	3265790	1836140	68114.6	548504	158080	203844	42751.2	88115.1	837231	673139	665141	759372	1173080	86379.4	488234	119227	146765	6710.95	489451	302018	967992	87190.3	416119
RGIG2000	309371470	22625035	59248989	16300169	7412874	1007970540	132866774	196296790	1002660150	1236.14	92444.9	7343580	1798390	154377	651495	191203	380574	81405.6	144858	1213450	499850	1012680	1203960	1004070	98772.9	554970	209284	204904	10136	508573	372568	1179150	150676	453446
UMGS1613	309078900	9831062	57204760	8046370	6644010	/	107011350	177216400	1551306350	1917.8	49837.9	8907030	433357	48066.5	467420	74718.7	191066	22280.3	54920.5	835744	425166	445223	694454	575602	87577.5	1336300	111638	112443	5217.15	235832	147220	457701	61134.6	265370
Enterococcus_B	308712052	14501925	43916160	16506800	16534700	86519900	75447981	476798711	753599910	5497.83	67474.3	11899400	1333220	87076	342995	229435	213067	102831	132228	747783	507669	700221	616637	820344	68823.3	524065	112466	191940	9588.01	301087	231420	677730	84607.6	320349
Competibacter	307188800	5514620	8643050	28961600	6706030	1911578000	58777700	62761850	2694832080	24687.7	36879	6288000	239448	52839.6	69961.3	31039.4	15189	180064	42658.8	103329	89181.4	27888.2	59324.4	47149.9	17694	6906280	82635.5	73739.4	4693.59	39237.2	25540	133971	10711.5	35816.8
Caccenecus	306302840	10753003	54309320	11354856	7677491	215766100	93623910	178616960	1099123100	/	65009.6	7776204	1090210	157047	438227	91223.2	1387495	600546	21895.8	465965	311199	836928	1020950	623673	32360.4	475867	144711	127429	4258.61	194349	245424	466969	88466.2	301601
Eggerthella	306160530	3969967	25369762	6231520	26779036	183059400	27072560	148369910	25532330	7878.78	50566.3	11460490	188661	17716.3	21307.9	13608.5	7204.19	/	8941.08	34565.4	76023.2	54759.1	39300.6	131236	3580.24	179174	14747.6	73438.6	9321.29	16900.8	23622.8	120058	14588.9	9838.9
Lachnoclostridium_B	305651120	7185613	39309246	8950050	25710800	176310520	69120817	303763810	189399750	10994.9	51570.3	11572900	416683	32691.2	236868	153262	98305.3	18722.6	40386.6	454045	175687	230636	270649	276838	27049	325042	45114.6	72836.7	11540.7	127615	104401	309946	44219.9	134338
UBA3796	305232800	4724052	4554776	1443890	2868312	/	39827635	28084470	21609530	/	25076.2	938878	197729	8625.52	55988.7	102531	9580.84	7599.78	35623.4	69034.2	57791.8	91928.2	53349.9	106880	10224.6	98906.9	10257.9	16579.4	593.072	20116.6	18241.4	69720.7	11636.2	25712.2
DUPQ01	304691090	3985281	22728307	7453348	11679700	22754900	12413762	187407940	158015650	1512.28	10215.9	2389930	166672	26251.8	48104.8	18535.7	29643.5	14175.6	21888	416130	104201	132946	124720	130366	15496.6	85051.6	23520	16663.2	1176.96	88740.9	70199	121418	19137.7	96286.3
Leptolinea	302564540	2372920	4729697	966333	1368420	320607800	30052730	7292920	54536480	122.279	3093.43	505986	69682.6	16144.9	58498.5	31730.4	23864.4	/	5321.46	150189	118252	46516.3	32456.6	74018	5528.35	116752	17122.4	31925.3	2292.44	34602.4	19676.6	61000.8	7358.65	19047.1
Microlunatus	301767000	2000600	11014700	9862010	138287000	1251670000	23364500	145110000	49010700	1807.9	11204.8	495974	73949.6	27452.3	77023.8	4235.79	/	2085.46	/	35419.1	22159.1	14383.4	21188.9	16347.1	36217.6	16616.4	3846.83	79610.9	21610.2	5126.1	11256.1	31679.5	3523.86	11529
SB25	301648000	10352300	11967400	18991000	20759900	167622000	5026460	14886700	47226600	1975.41	5281.53	1607780	924996	27343.9	30138.6	12117.8	9459.74	838.129	8177.49	31836.6	12803.6	16807.6	25404.7	22460.2	3250.08	63776.3	31239.6	359147	1822.35	37140.8	19686	33403.2	5492.75	30205.1
RGIG4131	301112100	7783116	17696390	5551956	15704589	/	22308800	45221898	150669200	/	30439.2	1572450	238488	68818.1	130036	2914.94	16702	15407.4	3031.98	260282	97058.6	161972	162640	250697	37065	112996	26526.8	33005.8	1074.76	46947.6	57977.5	139664	21371.4	83731.4
67_14	301037540	10256200	8836543	18592900	14987938	780937400	156251160	60349779	4464728500	35074.1	78062	6956980	17253400	185105	120988	77601.8	66250.7	55155	68906	803931	106066	166669	149423	341419	429140	5924120	82133.2	572009	56849.4	90125.2	32505.2	186256	41103.5	94746
UBA1309	300925300	4019220	5902540	2594990	5893540	33757400	5829230	19397157	16871810	/	2591.59	785766	22380.8	30552.2	51600.6	99741.1	13962	42905.8	66912.6	103601	61027.3	42634.4	31023.5	26002.9	9643.41	74118.5	51789.7	94993.2	8052.67	25607.2	14934.4	60867	10405.9	24175.6
DMER64	300327390	4653020	19005701	16769800	6116350	378348770	48853508	427119285	207674000	5167.66	18281.9	6441270	338820	52996.3	101649	137944	66582.1	81936.6	92314.8	211292	200161	90823.7	255339	111849	42577.9	1080840	131686	137521	16246.7	225390	125225	260853	48005	176919
RUG11257	299953767	5078360	8243880	3940060	1553000	231501770	56211633	48099945	352719190	5847.38	22859.3	2115990	610011	106020	292587	131023	102400	128715	179548	452838	361236	144318	205783	365840	42261.6	378296	135129	171373	4245.1	402957	139645	445195	60716.2	289389
Legionella	299742140	19764023	16867300	8670870	6710410	642378490	714186680	41946973	938594000	13347.7	141976	7604820	4552580	509841	886220	411350	252523	334679	385842	974161	957796	363659	679875	817057	266148	1716620	456561	688585	82463.1	648703	461474	1310720	213287	660519
UBA8904	299579220	18803851	52093261	101645972	9737000	555592570	181505662	171382708	168368990	1996.67	26204.9	2875690	634639	80388.3	225979	59168.6	129069	24967.3	53052.3	482834	188227	212879	179862	218538	45217	282209	115199	304290	13648.9	140811	105270	331790	40836.5	113401
Cloacibacillus	298452390	949739	2465931	2061420	3941440	85928500	4891910	6352710	7022340	106.689	2611.35	1568547	20757	5338.38	18764.8	30058.7	8003.54	/	9240.23	25258.9	29547.3	7301.53	14504.5	39948.9	2140.34	34346.1	89356.6	201224	3503.06	19310.1	10249.7	50295.3	6645.05	9469.71
Flavihumibacter	297169740	3816800	5767870	3460920	9362390	1966742000	77929953	53785020	300406570	4109.55	13110.7	1515340	1130010	270233	121862	74330.9	69996.3	79562.4	46582.3	149427	266018	58084.8	123728	142306	180262	341358	150748	344945	48205.4	138785	104894	292056	27301.5	118775
Anaerotruncus	297132228	8564250	19838835	10322015	9795423	537890800	65500329	94702158	110582780	1387.52	24692.8	5510390	881179	65757.6	116595	17032.6	45939.7	8110.94	8746.48	111504	107616	131077	180668	193793	40174.6	249386	46958.1	102279	4638.59	66103	74476.9	266147	33613.3	63375.4
Clostridium_AO	296830160	3446285	23564265	3914590	2381500	102934400	43863300	70736267	406338400	/	8095.23	2642500	317812	37072.6	187718	40949.2	83128.5	18548.2	48539.3	140959	158715	283316	217892	126201	28208.8	116380	56300.8	22043.5	2898.27	70242.3	53956.5	154441	39658	64248
CAG_452	296742800	8240989	47905310	8061223	11014971	65889600	51689660	270661200	1002371500	3353.28	42299.5	7698660	634590	60969.2	253928	73732.8	64970.1	60269.4	68216.7	846687	215252	218690	723228	710291	76976.3	262849	224665	135111	3955.16	140120	185410	401144	64866.1	157934
DUPM01	295825800	1864863	13672290	2788740	4425371	238320800	10955469	47898800	41367710	/	4386.68	2016858	66762.9	11992.6	3666.23	15418.1	4744.32	2483.89	/	38713.7	30105.2	86513.7	38747	17904.4	/	42323	18473	15481.5	336.758	14004.7	6805.27	30039.1	10007.3	8896.05
UBA6	294989418	12570906	1475964	763598	1585158	903529400	63345310	7528132	63045450	919.068	7479.06	274266	100168	7378.11	107441	30593.8	16200.5	2361.08	32630.8	124922	19172.7	57778.3	38921	32879.9	5772.55	34358.4	26736.3	29115.8	5850.98	12956.9	15186.2	125782	10921.5	17794.6
UBA1715	294049200	7738958	5607954	8662585	4012784	22079260	16189964	18773296	63027800	1929.18	6292.82	535402	122507	58522.5	42256.1	29798.6	32308.7	137061	30088.8	66479.5	159567	57947	119547	124877	15900.4	73857.1	59558.8	78811.7	4777.16	81367.9	75132.6	219147	29038.7	67054.2
Protaetiibacter	293329690	19983634	15351349	13788285	14157212	2101282300	347713180	107167270	354377300	17968.8	59353.8	2870790	6147704	146123	215786	58227.7	48984.5	37542.5	36289.2	351087	200954	231131	198412	453890	75655.5	323912	39861.4	583773	43878	85697.5	138718	596037	81162.3	108381
UBA6192	292135970	10615800	21703349	7261630	17147903	752012500	59818630	48076470	238928211	2059.85	15386.2	2199882	570734	226489	298362	203389	63616.4	108043	83053.5	445225	304571	128613	234746	152043	51261.6	442292	255093	570413	20585.9	231486	148849	416430	56680.1	194971
Limosilactobacillus	290987701	14447600	74615400	16193400	39072900	250826750	141946280	723164534	870883970	3465.96	118815	17414600	1711270	140234	1161580	198590	258517	123558	124719	1054000	580933	1400260	968559	1237180	98556.5	1037540	170775	665874	14143.8	409733	379515	1071880	125447	525787
UBA2882	289816600	7779010	25051362	8385826	8529466	289074700	50810680	226076790	441827700	1117.78	17730.7	2992059	268013	53596.8	139758	63154.6	67050.6	27034.7	46628.5	316969	154243	306749	310139	478613	34010.5	156303	54803.4	71502.1	4629.32	96220.9	68214.9	263439	38226	143866
An92	289122250	5811495	11343597	6469190	8269323	193055810	47096946	90174670	67989720	/	14229.4	2949920	180111	44480.8	94494.3	46985.1	16961.4	15991.3	10419.8	134163	89897.1	43894.2	123067	294389	93991.1	101133	39840.2	105715	4199.79	82897.9	72304.8	259907	29686.2	73346.2
Dactylopiibacterium	289052100	16518966	12879300	8949495	20550735	421256900	31054210	25676009	81962690	3514.24	9946.86	1986690	92232.8	182399	92933.7	17892.1	16697.9	7157.92	30281.2	137111	67159.5	31147.7	40145.8	59801	344846	87512.9	478746	1880320	120141	46690.2	27203.4	94617.1	23073.2	37548.6
Avoscillospira_A	288357420	2185116	2991057	3206421	2100227	369765800	26787990	40147280	41799260	/	7753.82	505335	191234	20796.7	10307.1	3818.32	5609.83	14006.1	6882.66	78957.7	77087.3	47938.4	50596.8	100754	6126.68	32713.3	5067.57	38274	679.982	23237.7	22141.6	78183.2	7985.9	29423.2
UBA5454	288300670	1337850	7748020	2189603	5994390	/	2574790	49519700	92347300	/	9025.88	834610	127926	4231.48	12721.4	9554.92	14504.7	5645.86	13981.7	41639.8	52688.6	64404.6	55757.6	109424	5008.65	65329.2	12626.4	15620.1	/	13528.2	36034.4	133533	7379.07	32015
Clostridium_L	287042900	4706170	21044760	6049867	4270120	357055700	37251760	93396200	325777300	1034.08	12323.6	1960349	238328	24777.4	130200	60036.1	58878	4350.63	11003.3	113241	94086.3	167411	204031	243623	18495.2	80876.1	25089.5	32169.1	1796.34	101813	48492.9	157827	16110.3	108879
Scatovivens	286896850	15411393	85276609	13726200	8172610	500746500	147436340	256809670	2055566800	2700.16	89605.8	12858400	2036020	142854	793000	473771	222558	61436.9	208467	1308080	723873	1145320	1121470	1148550	134890	602126	131612	157244	12183	320126	362930	849713	142656	392540
UBA5905	286246580	10711945	13787200	6614830	3586260	214335300	164033203	84574580	275915130	5702.51	32405.7	2253290	544997	45643.7	198834	86350.3	27484.1	10535	33444.5	401578	263175	228985	292179	366356	37898.2	270773	87951.4	94999.5	3102.93	111043	112031	437186	66141.2	140389
Desulfosporosinus	285880000	19113629	35168175	39454454	11069300	133135290	325410220	134206970	620500970	2656.12	60978.5	5352601	1279510	94698.6	336098	194719	170371	64064.3	110513	575498	506550	617643	806240	1292730	73371.3	458333	99850.1	259770	6895.65	278778	228926	803621	108145	323421
Rhodanobacter	285858386	112474638	19385200	8288774	7605890	3240964730	1449814247	37725751	584575560	34998	91885.6	12936800	1420200	580977	1192370	310450	127208	253260	252846	869615	794510	157697	417632	536542	131183	972797	237242	642973	46270.1	405616	277951	894438	157490	383908
Winogradskyella	284502940	18623533	52540146	19310900	9378370	1419225190	187191777	529081810	1639360560	17372.9	113316	22160664	2559380	671736	9935980	3123960	3234820	4811440	2465260	4931500	9313690	2279190	4519860	5169300	311684	17880500	4138290	596954	96425.2	4314510	5020930	5052150	1110260	8832720
JADKAV01	284391300	14536610	207815000	99310610	67130370	586656100	129930300	380121070	45285337000	193393	618998	79432310	59583270	100756	43631.1	95647.5	72150.3	452190	216411	309306	144734	445391	221188	248087	1094540	51684300	558678	1377150	129327	121225	19698.5	419739	10852.2	89661.2
Nakamurella	284098268	49381877	46466650	69260998	156599000	2685796380	4332671390	1092221190	631577270	18077.1	92584.9	6389380	2342170	163400	253430	81165.8	109360	25436.4	49259.1	327702	434582	430284	393730	572414	271847	518400	116017	703948	60954.6	139619	169400	502296	95883.6	161931
Pseudoflavonifractor	282753564	2167948	5655981	4502110	7888533	80697900	22878456	43218790	35268870	3950.98	7473.12	1040359	99927.2	11033.4	31162.5	29519.1	22240.6	10832.6	6770.36	38408.7	35325.5	42474.7	65459.4	60230.4	11139.1	64350.4	10209.6	36023.3	3711.14	33827.9	24948.5	76412.3	9911.13	36320.6
UBA3792	281788560	8863286	8870830	12667191	5881680	1367489200	101955388	100731848	182164370	1917.62	40766.8	1876860	650316	50957.9	163589	44812.9	118450	54700.2	50651.5	143922	208703	215290	244444	402626	29137.1	160983	49310.3	64052.6	4556.74	148742	85363.3	296793	45586.4	205500
RGIG4079	281355070	3667338	13410396	4184500	3109970	369192740	40899718	51501070	263173830	4569.23	17558.3	1956020	176806	108530	356220	164239	83635.8	55582.1	80675.4	267500	475128	65244.2	250190	203041	28765.1	249449	161794	124095	12898.8	252710	154865	466937	46922.8	239744
UBA2334	280947770	21725801	1451130	7268620	364244750	338300200	41354135	5352560	212962820	96611.8	10260.5	452078	181189	9672660	61716.9	38368.7	6465.69	17471.1	22354.7	325562	97062.7	22978	84534.1	111049	772895	851242	913087	863460	1198900	46497	66137.6	285729	29193.6	93686.3
UBA2897	280550100	3514375	4684629	2135320	1759128	47160800	13167904	15395070	5247040	2230.85	19556.4	837965	36426.2	14224.3	12511.4	6263.27	/	1394.47	6934.64	60205.4	45626.7	19806.5	39535.3	40301.6	2607.97	20858.7	9476.91	33224.7	881.339	27330	17122	68617.7	9455.9	31387
Citrobacter	280154620	4807066	12760580	12743220	25910954	291422220	35934579	56588402	79880416	1789.59	26300.9	17029619	172785	95493.8	130911	119014	42880.3	47948.7	111380	165814	181690	40689.7	124979	130071	41248.7	193182	116282	208349	30813.6	104012	91550	323744	59735.9	90174.3
Actinoplanes	279352420	152265490	30484100	19177180	11046700	13442602100	2555766500	178120598	2544585200	32125.9	254941	3981750	6869210	429736	1874830	413643	343541	144031	252066	2400860	1295620	1226720	1132830	1958800	509219	1942930	350199	8074930	148577	650565	567713	1452780	310353	650439
JAFIHK01	279210000	5337720	4820480	7656880	4461900	255398000	1475300	10748300	22800700	/	780.226	494207	12640.1	11189.2	37915.9	/	1296.82	10507.9	/	7273.24	22788.2	12792.1	10311	35418.8	9089.5	22548.7	201602	3572600	14677	16372.5	4805.16	80241.1	769.649	8561.13
UBA3207	277836870	13001024	38800098	55286551	5840010	73591000	85699480	531977860	892345670	6628.88	73891.8	9933400	1325940	113526	388390	219200	242785	91821	120921	1270070	487282	1385180	650118	1367470	95445.5	316571	209762	131441	2060.66	281982	268634	602434	93064	323195
Sterolibacterium	277534410	49398864	6279932	12745493	18356770	3363152000	45482454	29109640	138661300	8732.29	18678.1	6802832	110257	1039020	158900	51125.4	24794.1	44597.6	37826.3	103676	174317	58196.2	105492	95438.3	52338.5	196440	113601	342810	30627.1	72875.2	35395.2	159034	24497.8	60082.5
RGIG4266	276967100	5824520	44969860	7137520	4999015	8833800	38330430	123501200	617009500	1303.13	22698.4	4517254	910175	66313	193971	42293.3	71850.5	24824.8	1136.53	448452	135918	201614	389348	183412	42095.3	267253	50267.3	51615.4	5702.06	72786.4	85376.6	194706	45612.9	109672
Syntrophopropionicum	276850294	1582390	2828310	2228349	1922990	162818800	24302912	26926700	86095020	/	2945.85	441004	142343	13019.6	13765.4	25196.6	34927.9	6217.74	9369.09	73993.4	66589.1	66145.3	70361.7	140679	3551.47	61290.5	14066.2	24369.2	1833.96	27642.3	37607.7	135308	9634.47	32368.7
Vagococcus	276772610	9685160	28931429	7903072	5656560	124623950	72576750	195530260	905253890	4006.11	36396.2	5689560	1198810	134751	355405	123055	165255	69441.7	131584	637822	344637	460014	450464	508475	56466.6	278577	110835	111637	6710.3	247235	198474	602775	84043.3	270114
Fibro_01	276542390	2424230	371911260	9290552	4176200	80081100	12909436	49851310	103693430	/	14270.7	2150750	52746	14505	62229.1	76931.9	7663.06	18017.5	34829	18430.3	43969.6	107792	74351.4	93419	9949.87	288761	51157.6	24157.2	941.363	45615.9	22058.1	109335	13271.7	33437.3
OLB14	275570610	19870626	9477070	5956660	10798600	32507549100	406184027	27532006	20528013300	16821.6	61234.9	2421420	3580250	1685140	876586	357210	100291	185681	212521	2478740	726329	254102	474760	686503	405174	2351690	730508	1461110	79021.7	471640	320262	1162680	130020	403954
Pandoraea	275528980	29506061	6389870	7196290	9085580	2714888000	362059649	25141200	472514353	459011	51511	2063210	2907390	490263	782232	284355	121115	113306	268403	777732	725023	225788	360267	1014260	153745	629898	419744	641539	77408.4	420581	265715	633943	226629	344884
Flavimobilis	275252010	9909397	5390784	5079050	13379191	813212200	163046170	26712210	128280120	5980.73	16017.1	994697	395257	39790.3	170778	40346.6	25566.6	15728.1	14104.9	153306	104348	102955	89575.8	100160	27408.8	150271	20388.7	93358.2	7299.32	70408.7	45541.4	148989	20594.4	67217.6
Soonwooa	274479939	6105850	3461470	7182377	13465533	26559500	20855280	54791878	69197400	/	6765.78	2880140	61491.3	32052.2	24280.5	19241.5	15722.5	18619.9	21868.8	32014.5	111935	19914.7	59066.4	23035.4	12339.9	85595.5	40067.6	72253.7	11295.9	66953.6	25885.5	97899.5	16622	66002.5
Micavibrio_A	274238750	5021450	6893732	9005860	10000631	282922900	39050914	22832997	124855490	2667.23	22237	4993769	12388381	184165	16520.1	15791.1	11753.9	24175	712.219	176706	39710.4	16893.4	31113.6	12554	84157.8	389314	189710	1546000	25620.8	33460.6	24296.1	74538.9	9561.76	41033.7
Erysipelatoclostridium	273929000	13206975	59760060	12735440	22102216	192697790	267331920	277025500	1076131500	9261.99	72544.6	17662294	992077	72739.6	214694	141630	234225	23511.1	94801.8	683162	406113	792534	696824	1388660	71237.7	365038	69982.2	144020	8841.73	207237	207333	562073	99513.1	243401
Albidovulum	273900846	8150570	23914000	8026354	21269000	3011311200	84248260	75808530	2458650700	52761.5	102587	18011900	2008440	247260	501523	251908	100394	189517	119253	501012	189191	60825	119402	161828	97023.3	2773410	309148	261469	89188.7	114125	100884	373507	46555	144240
Methanomethylovorans	273743490	7249340	6845887	3901130	12019000	1001079800	21169412	18875588	99724070	/	16997.5	1694570	124999	38186.2	69107.8	56431.1	11300.2	13437.7	20091.2	230092	113166	87951.6	150859	94039.6	10853	99120.9	61474.7	295160	3675.84	54026	31859.7	119791	19484.2	46409.8
CAJOIG01	273662414	2817818	975180	4311310	1956930	120309030	33997590	36953820	40765750	/	3961.91	553905	218447	18480.1	55900.9	29002.3	2732.56	3007.27	9001.76	/	77832.2	61689.1	39593.1	22748.9	9938.74	66976.5	7908.44	53415.4	2028.99	23072.9	21988.3	129236	5360.71	22370.5
JAAKGP01	273635800	3225110	1795850	3667410	5670429	556858000	45689370	14030746	184711000	3993.54	6647.88	1614412	232871	106051	140466	52200.4	31835.3	25580	61178.4	419026	81941.5	31179.5	35340.1	66688.2	41978.7	371228	134268	92780.1	50119	23780.1	23940.5	124061	21586.4	43124.6
Vogesella	273581080	153338810	7326618	105375288	439300167	687194400	77698080	16802270	165268190	7520.02	22212.7	7663120	345697	633660	189955	108069	31263.7	44438.5	54971.7	296958	241311	55263.3	93238	166663	409351	408498	1115580	1265160	3249620	149689	83917	373319	52814	166665
Desulfobacillus	271748070	59973780	5187887	11259842	14592274	10042020000	243261510	26636008	687083700	12182.1	39143.2	2353560	4746140	968768	256074	114175	56085.7	51536.6	93012.3	506354	277520	41340.6	150009	162060	242536	2568380	235819	820943	44780.6	102418	84887.6	364679	65579.2	137476
Neorhizobium	271495110	12783448	5791920	4831070	4842510	1908922630	287996940	27822108	314894480	10982.5	38127.8	1976020	798217	407986	637974	227976	130844	164713	187170	764586	548436	179265	294422	383400	119183	669366	323777	1217100	110013	368778	219953	738539	138279	334172
Anaeromassilibacillus	271449480	2024073	12613480	4234011	8895878	101742400	19973752	65329310	51608110	884.228	14044.9	2802780	162478	9017.42	29647.5	18930.9	5676.88	2913.96	6562.16	164973	68960.2	53790	105669	143882	4976.82	57825.4	13541.3	34708.8	1705.3	28507.3	24843.6	85880.3	11895.5	24421.8
Fimivicinus	271177970	3994360	32729760	10286816	28633839	95193700	37578080	642416170	89826030	1797.17	26922.7	6200328	33313.7	21302.9	31586.6	/	18214.8	19377	1888.41	151888	120491	62872	79535.8	42382.9	7298.94	119890	4927.25	43647	2270.3	30507.8	37284.7	59802.8	10213.1	17523.1
CAG_605	271114300	2269185	22826867	4867790	3292653	171637000	24827685	96239800	679835300	/	9406.85	3394420	411581	20162.3	53808.4	20007.3	65357.5	22875.9	32768.4	190340	199701	181530	205001	203502	20262.8	111840	34252.5	33853.3	1917.81	108739	59965.5	93425.6	18348.5	121815
Rothia	270611682	13341100	25690909	11892100	16869500	1237155150	194932396	574165801	307308841	10555.1	75059.6	6439560	1415290	139842	407230	122438	148209	43122.8	129664	1073870	815172	645584	725762	1644470	69248	848258	108001	436476	20247.4	412008	361108	769376	200511	373499
Brachybacterium	269770840	50936627	170144236	79385568	20073300	4871532790	687298470	3256325520	783855360	26621.1	218045	20969700	3240090	193908	734973	212105	267859	108486	147706	936002	1002430	777671	807614	1479090	127872	1035190	145723	937676	37723	409021	387661	1129510	273694	407546
Duncaniella	269644520	4906330	7809091	4318180	4214480	278035760	61338852	36684632	187222096	427.208	20432.6	1675860	352512	103312	350339	137507	83730.3	68478	117099	420499	978316	145968	355206	259263	44411.3	322609	186682	146367	12018.1	256010	208268	635334	89043.6	255417
Blattabacterium	269609598	17899800	40242200	10812799	9403860	371933100	223578413	116508712	1765959210	4338.69	86937	12647400	1650970	1055560	2049320	1160780	1302200	1360290	967849	2571300	2519940	1098950	1870060	1494490	274744	1887790	1289950	378765	28042.6	1437080	1180400	2366520	487646	1316640
Enterococcus_C	269474370	5355662	20082383	8813650	8444790	65744700	26587851	198246140	576391490	3278.12	24772.4	4734660	325683	40525.4	169064	28362.4	80328.2	17322	25220.7	240206	204067	203763	279153	196824	26712.9	173866	51216.2	57752.6	3491.89	108988	84660.3	287375	41666.7	125367
Buchnera	269051412	15823800	38412800	12569900	8026750	2256149000	390075123	128716743	2004171140	2222.82	173583	17820100	1586790	623689	3085990	1176210	917183	996310	691696	3209560	3118050	1345000	2132090	3121600	235915	2436760	862996	482645	62898.7	2993560	1782490	3210420	693456	3173250
Syntrophomonas_B	268914700	2728710	3404459	2177795	2056602	36461300	50115830	30121660	52433090	/	5086.9	913725	154298	19698.4	59165.9	16233.3	9670.45	5894.57	15365.2	49817.8	51676.4	83065.7	66092.1	64848.7	7533.54	23525.6	25063.7	240456	834.935	29104.8	23016.6	138344	6321.26	29757.8
Curtobacterium	266334096	95857795	28192400	14043200	10139700	10471833300	1560700840	195029715	1776445340	47715.4	216363	3432370	6734000	320386	1530870	434115	398452	117748	275553	1692940	1513910	1228400	1041010	3193700	319470	1475340	342152	3006840	103899	523356	587812	1431340	327370	575549
Poseidonibacter	266046600	26833297	543584400	68042390	16130261	299750800	59649980	668730500	405242900	40103.2	362205	538338100	303672	171442	496748	259380	172898	495248	567165	974597	502692	175412	437702	480663	42133.1	5430486	456327	218889	6765.16	388900	380956	569615	231391	901795
MGBC122484	265958100	4029196	5561375	1755250	1911460	100228500	22786033	19772276	157895010	3743.77	19538	2076350	232202	107118	477147	184820	124908	102224	180459	308490	774723	229954	422229	309214	21288.5	179556	395436	91664.4	3151.01	483734	268858	539145	102842	515173
Peptoclostridium_A	265873400	2370996	34036351	5000370	19627502	/	10807910	580520000	58121270	235.029	8134.73	4774040	18993.7	15928.9	79848.7	9181.82	18903	8389.26	3534.55	80175.1	11848	67032.2	62830.4	182149	10164.2	63128.1	20205	34095.4	/	34756.7	58604.4	131517	10108.3	22299
Soehngenia_A	265314410	5141630	98426900	6939390	8609710	19966100	22077390	298253000	313817500	/	13096.2	5986970	974345	50718.4	150192	37506.7	22277	4012.2	14195.8	466738	172364	247480	319273	150935	65017.3	80707.2	41801.4	44922.2	2464.34	157112	64172	162406	22465	181714
Coprenecus	263927442	4067520	12783000	4722150	5396380	237371040	46394796	44488876	151079327	3112.57	17153.6	2068240	282865	65776.7	319156	292671	121945	157856	172676	318248	388527	117690	226507	229467	33731.3	672784	396631	175518	5519.04	248675	161654	428779	51422.6	238328
Treponema_G	262833810	2826314	1302430	3018208	951806	36147500	4699340	3989163	42549880	/	940.693	297822	15229.1	18479	18926.8	5605.41	4393.66	2436.7	2083.24	6880.83	27049.6	11326.4	21320.6	17935.4	7630.79	84349.7	8421.51	12832.2	782.201	42301.6	22156.5	87911.6	12759.7	24711.2
Ethanoligenens	262220800	1786627	2681870	2762295	883477	58566700	13928280	22963330	72190800	866.205	3425.96	538264	101188	6948.99	7723.67	33125.8	12575.4	6427.7	16241.4	16492.1	34275.7	29938.2	46724.3	84607.5	9433.83	62002.6	9214.05	19652.5	1872.47	28652.8	43185	102302	26595.4	28347.3
RUG12372	262053790	3582073	7235380	2985230	3304164	71200700	38781660	14034820	43450120	2266.74	23200	1251350	173615	111217	87145.1	27754.6	10292.7	2118.22	24948.3	68309	107478	87634	155212	199390	14737	88027.9	12030.1	33997.5	2819.88	47964	41322.7	197241	21080.4	62576.6
CAG_433	261706070	10719107	54616340	9907820	5206916	268405200	91539320	261353610	1313580220	/	67802.9	10778378	958010	108085	684086	58985	164259	208707	105459	739387	225060	944662	503678	719147	51382.3	525103	58802.7	121264	3860.91	252704	155295	472028	91113.2	285580
Hespellia	261698000	1416390	15702000	7396800	6331710	101245000	9544900	116648000	29035200	3780.25	7202.61	1695730	40830.2	11775.7	1221.24	7610.36	11908.9	1618.57	/	45640	11783.3	11913.5	15878.5	44042.6	2249.32	16617	6525.99	20544.4	820.213	11275	5772.99	18637.6	2667.85	13127.3
RUG806	261349250	11341435	35751838	10808800	3327890	304298770	120272886	138266054	484866050	2955.08	60367.1	3415410	1062710	59164.9	383153	140463	220829	75866.3	107311	614610	372410	616471	486289	678706	37442.2	351006	81830.3	174810	4120.63	231416	211123	610734	72413.6	205575
Campylobacter_D	261119347	16058000	91943567	20026100	9615410	390913500	120606439	226712992	1060375240	6625.68	99450.8	34019900	749084	410280	1161940	413571	281207	229161	308947	1120530	1442250	710994	1129910	958750	178937	1742370	549206	336689	19109.3	816279	694265	1801470	280681	740378
Pantoea	260661144	11764000	32089800	15352500	29760300	1455064480	185509154	90893819	512179223	10712.4	40624.2	14478500	696077	319180	893194	305024	154790	200681	517730	691098	794859	206545	417818	700364	163132	962316	407372	2778900	78058.7	424257	303223	1141480	257921	433937
UBA1364	260402540	4609838	10475258	2679054	2463469	307695300	36194498	54964580	823888100	/	14231.8	3727660	797091	220092	116378	12076.7	51646.5	13972.4	42691.1	224661	219974	106638	238583	127090	14927.6	1574830	145163	66609.4	10880.9	128853	118102	234319	23526	154116
Spirillospora	260158503	109883131	23185600	15129000	6454250	12650601700	2156319400	122154323	2262054920	31609	212653	3659800	7184180	361867	1468510	345411	358048	105349	239069	1647010	1242740	1350840	1125820	2038910	340332	1874500	272826	880005	49870.9	641016	654902	1559900	354169	722517
Bacillus_A	259947729	26698800	67888762	14763200	8607440	1267983910	479908245	273836802	2045310960	10879.3	180503	12797700	2626370	190528	955905	494793	535161	213788	284957	2507350	1468910	1502830	1469420	1676890	223515	1314450	427272	451237	24271.5	635979	513538	1614820	248302	688854
Peptoniphilus_A	259173660	10265954	60461420	9731371	4334260	258832200	103699601	176768420	1155539200	9278.9	57858.5	8683160	972963	96345	420152	173603	232951	128188	63896.5	970101	342745	775278	745413	815440	73608.9	341056	121902	104614	6388.68	211265	209571	484436	90304.7	305795
SZUA_370	258694160	9194891	2783300	1758230	2473208	119053490	21178080	7475101	175056370	480.362	7113.85	235724	62287.9	26838.4	31554.9	9598.06	10018	6304.95	10386.2	35870.1	111509	22330.4	38829.9	31552.7	6279.66	46093.9	36102.5	57972.4	4354.22	19750.4	25444.4	63168.2	10784.1	25533.7
Pseudochrobactrum	258285606	425501	2674774	1235070	260040	28593670	9662080	10147917	21507207	437.566	4877.15	1585730	45745.7	7143.36	25804.5	5169.56	6361.92	11606.7	17436.8	31235	26978.4	4387.84	15844	10088.1	9827.91	100007	9516.23	33500.9	2203.17	29085	16217.7	58686.9	13373.5	24132.2
MVYY01	257679400	5057294	9158041	3901770	9906600	269970700	20879340	35599579	57687100	/	7759.05	1004000	142505	58818.3	99215.2	59237.6	21174.6	19980.6	18755.8	109312	105849	65673.1	75903.7	37889.5	15216.6	91383.6	48581.9	118952	4937.91	55118.7	59195.4	172816	17618.8	45879.6
UBA9971	257368600	3565078	3431775	805272	2450570	28304100	7248830	11356280	33990280	2549.92	3776.98	508468	63369.3	18383.7	58747.1	25569.2	1572.02	11432	12811.6	/	33920.7	34181.7	49300.7	87914.4	8646.71	81214	51483.3	74282	4887.5	66303.3	37424.7	87917	19709.4	48385.5
PeH17	256574170	13509295	35349713	14095700	28038700	492837500	96673670	530613850	99143100	6598.49	37409.9	6921920	723054	50005.8	76693.2	39614.8	50945.7	19760.2	45738.1	347254	182054	205347	347884	188693	23144	232492	39375.4	77846	15569.9	100803	121650	304321	28997.4	179525
UMGS1663	256088040	11923463	33725370	4035040	7587788	90131200	122239700	159959500	407881610	/	36571.6	6431324	576805	58245.2	215925	110961	108895	19753.7	34417.2	363034	266726	416658	478817	472123	67190.8	278096	57828.5	76587	3831.78	122368	80215.5	385168	65449.3	240537
Paludisphaera	256026850	29421270	2386710	2630500	3233270	9791792000	1616128000	5301042	60324360	28763.7	51727.6	1863600	4188420	117455	222116	47572.2	16035.2	11760.3	24289.2	113270	106504	21171.9	40964.5	78128.6	104646	226076	93662	291010	68022.3	76569.7	36073.7	113105	16716.6	29615.8
Pseudolabrys	255752770	82788420	3245160	4602370	5651140	6192986000	1295994000	15399189	701003810	32164.1	157091	1450590	3279200	353360	795202	193784	78907.8	198149	99268.8	739914	394075	104576	230481	356059	293510	895022	691464	2430930	316373	320818	187942	642243	100378	236280
CAG_448	254794591	10739300	25305200	9778200	5682850	588925500	143465051	115246709	557419190	2274.72	53809.1	2096620	1712280	79858.5	306675	89480.5	101874	35586.8	102408	679969	488606	468554	806962	832453	60966.2	607931	95573.7	136015	4679.41	312477	239689	778393	104501	475188
Rhizobium_B	254203000	3482560	575842	2451970	4201170	23608800	6176530	6971450	13509100	3151.37	2131.38	437434	55048.6	60420.5	25919.4	24329.9	2226.4	19872.3	28055.2	29796.2	24855.8	3866.89	9560.03	10975.9	1178.3	45712.3	14460.7	31897.1	4380.67	5715.02	9565.27	34310	6210.01	3670.46
Faecisoma	254010000	7058726	36689346	7946293	5786420	/	53814290	118885980	949274600	7462.48	36616.2	4893349	570484	63666.4	199319	152016	446976	53216.6	39606.4	277596	236280	553129	441065	298052	31273.7	219062	105407	47129.1	3465.48	172132	112463	323521	72117.6	304296
UMGS1477	253549100	1330739	2269882	538148	1955872	55925300	8888410	11016830	48983300	1492.8	7461.1	1184830	66258.1	38553.9	126005	31367.9	34564	79449.8	31534.9	95994.9	234970	60960.5	92474	75300.1	13425.7	68889.7	39141	59341.1	3102.8	44082.8	70953.3	119886	13509.8	53434.9
Clostridium_P	252103900	8997920	37698400	9606050	8722200	413669400	327954900	374591913	1006846000	4031.88	50200.8	5734380	1744320	61242.3	155316	61867.8	109505	31635.2	46968.8	697147	223315	321154	473484	474935	54341	570221	75909.8	237845	11354.6	128513	124637	284312	48105	164818
UBA1181	252029650	4456650	11309583	3969150	6708380	191645030	24853608	53037301	174522550	/	12214.8	1520770	231851	70142.6	176163	90303	77925	104837	63482.8	315398	537758	119517	204428	262868	36100.7	242309	84360.6	84377.5	6961.88	159045	134606	415615	60540.4	170482
UMGS1375	251678240	4882060	33005533	5627946	57170719	14096000	12009383	258214240	29474810	1760.43	16943.9	6470360	224113	18596.4	56045.5	4354.81	25478.6	27959.1	9755.7	102099	37792.2	58603	68817.2	35874.9	11596.8	61242.6	15971.4	44730.4	39768.9	30200.3	30545.8	159520	15816	25491.2
UBA3402	251399900	4784580	28713000	8346220	16749892	121920270	46002677	119488492	362523242	3215.23	35667.9	11753200	553914	57609.8	235536	67429.8	86104.5	32525	43986.2	237849	178803	274968	237383	338187	20351.7	261019	52280.9	66025.8	8996.02	118381	86361.6	299622	29895.2	137136
Peptostreptococcus	251215770	6457690	48589540	8411373	5876847	229924500	70069776	353798490	667746100	4811.82	39901.3	5783010	1037780	57289.3	196654	80469.5	147969	22441.4	46432.9	527899	253435	466353	452787	436215	32080.5	273952	74188.5	108140	7636.11	213468	159382	448625	58031.5	209403
Lutibacter	250985400	15155472	253143214	89182109	9604450	1407191710	145048282	1059542030	1297663700	18476.5	188109	116565689	1557520	451103	3129130	1325430	658813	1012110	840172	1814600	2638400	842904	1638850	2044770	182534	16687674	928302	415988	57250	1133340	1139270	2343210	407913	3047170
Intestinimonas	250305300	3223230	9524570	5158970	7455979	157314690	55683549	73039380	150242310	3845.87	19348.9	2773710	892312	24248.1	185336	45401.4	21689.1	12948.7	35347.8	82585.4	290916	242886	271232	344889	30729.1	116949	26800	131266	4455.88	91810.1	60180.2	188548	40607.1	77201.3
UBA1321	250065300	3436043	940878	786425	1333020	371516670	21376010	2575481	13742970	1160.29	1442.27	150185	1881400	45741.2	24628.1	7528.53	3211.31	4133.92	36503.5	126440	21102.8	6908.25	28604.1	20347	8581.35	24544.1	29245.9	56422.1	3532.4	29692	26663.1	78088.6	8918.04	30565.4
RGIG4576	249831010	1185802	3882003	1718990	1584280	57493700	23220620	28739190	31260910	/	4860.84	593028	94353.5	25476.5	44486.9	28670.7	13966	25592.6	14875.7	58416.6	139665	38834.6	114736	187997	15161.7	100155	20047.5	30957.2	2346.2	76924.6	36198	119170	16264.4	67033.6
Dokdonella	248871800	8067472	53282483	18398500	15719900	7881110400	171928450	49845946	298430600	14711	120160	63004800	1111752	214094	241429	87163.3	32580.5	72584.5	80696.9	248707	147680	17893.7	96873.7	135196	31589.9	916752	79445.5	186192	17068.6	104401	91633.8	208788	31825	128879
UBA4179	248193470	3379098	10235991	2746753	5742766	195165500	17155265	40624175	58949680	/	8265.36	1448260	70597.1	43062.9	119562	33253.5	9929.76	26784.6	7655.63	79536.8	319319	43596.5	77749.8	40804	16488.1	181393	30742.3	70029.6	3588.21	82185.4	33506.4	148281	31590.7	41211.3
UBA4657	248019000	8219810	5096120	4605970	6609620	87351400	17429100	9006990	11413600	557.952	2529.86	773207	63867.4	36155.5	28513.5	6470.55	3166.74	1443.55	16727	49154.5	39327.7	3180.92	4725.8	16979.6	12815.3	52511.8	18456.7	132699	12234.8	15408.5	21566.7	68552	9090.92	20982.9
Enterococcus	246739240	12827275	54390662	11169300	14631500	297827100	95359094	298739730	1055272760	4796.29	74217.7	8839570	1334960	96148.6	389654	240928	215026	68687.5	103605	1004270	495360	917486	1006830	995439	171395	621948	122251	246665	12947.8	406827	298010	823041	87631.2	401522
CAG_266	245694350	2253871	8909040	6511620	10411800	42615900	9774416	57572900	42854540	/	13696.1	5234356	130076	46830.5	89331.5	5517.82	37752.3	15743.9	24357.4	95035	68483.5	176036	72585.1	125373	16240.9	48083.6	6922.37	28292.7	1425.01	52716.8	41868.3	69246.5	11389.8	64286
Faeciplasma	245267270	5052776	19782498	6882493	5788340	180471100	17892970	107962261	86835120	/	16735.8	4253313	172523	40859.5	16686.5	40709.6	38701.8	1992.55	18537.5	283702	133116	126681	121683	151375	17806	78822	44197	51752	3619.87	81332.4	59565.8	134141	16451.5	79751.4
UBA2450	245038200	15994886	54620127	138423710	3798470	145979400	140037948	826641900	1622073200	4383.76	59185.8	8886513	1100800	123743	554307	114094	499868	113714	25276.3	841523	440147	965111	859651	905685	63772.6	456105	128676	125399	7733.83	309859	298347	967389	126349	426848
UBA6398	244136060	1198960	3361926	4454640	5157222	129780030	11577719	35214420	105532030	/	4891.2	2207720	81954.4	34403.1	102992	66349.3	18451.6	11696.3	33985.7	151608	110079	63017.7	66431	78475.4	8033.69	90432.8	57994.3	75234.9	7167.31	58500.4	45006	117924	17707.6	38532.1
Phil1	243954400	3823638	23466110	18067891	13015582	197114200	19353610	406096900	18522910	684.378	14926.6	5968088	94849.5	9646.02	30684.3	23342.5	1011.05	1238.29	/	26078.9	32559.5	9148.71	63443.2	130464	13593.8	23366.1	9563.57	95376.6	7169.66	15246.2	26418.2	67090.8	14022.7	19118.8
UBA1020	243221940	3410920	23773381	10346729	6667151	2808110100	70969390	260546700	312349900	22746.8	43208.3	33221069	1943170	646021	136364	143814	59122.8	30077.7	18167.7	182801	126013	255000	245656	81818.2	39401.8	986515	111585	511606	22351.2	85398.4	42211	365176	11465.1	48040.7
UBA5448	243046000	428586	1661660	1923100	1163670	29865700	/	8137740	163731000	/	2827.62	41008.4	19895.2	1429.08	17462.6	3280.89	6698.76	2295.2	3420.68	14215.8	/	/	18184	/	5929.95	35751.7	4826.1	1201.48	/	15802.2	16077.1	29317.2	3945.71	14693
Facklamia_A	243000400	1965150	7461510	2047287	1819360	171387300	29121860	60813960	101386027	677.015	9200.13	924083	139105	13697.3	31877.2	55209.4	65406.7	21064	11816.3	173932	100299	178387	98493.2	73016.8	21271.3	116490	16541.4	20355.9	2144.16	44239.5	37703.4	109390	12943.4	49793.6
Cloacimonas	242676080	3779002	24908700	15106500	9174701	401539400	8807932	39801710	139768410	830.244	9257.9	1011300	149432	39017.9	79405.7	28289.4	4224.74	28366.8	28622	72674.6	94588.5	50904.1	99467.3	61533.2	11175.8	72642.9	81649.7	514143	5460.52	65653.5	33761.5	137011	12937	109112
Neobacillus	241497160	26519212	68732023	14748390	7763800	503810670	276181923	274332090	1991338200	9387.97	115186	10424600	5356430	259087	907140	264158	414342	126522	192261	1393400	886627	1323730	1409260	1619920	144698	931107	258795	266290	12200.8	634826	429118	1517810	187092	731739
WRMS01	240362430	2935560	6180360	4081350	2405557	83872360	6926919	45676560	56509040	/	6377.05	726985	111950	7732.2	99350.1	7612.53	28238.7	/	19749.5	115574	73725.2	83624.1	75938.3	215622	6796.41	94887.1	21433.6	31266.3	927.504	37404.1	22672.8	144982	11028.4	53350
ISDg	240244744	9169610	25624941	5773170	7770240	342220940	91844909	72974652	463205740	2341.07	28354.9	1035710	601139	77585.3	144333	84641.3	53744.5	21266.1	54658.4	202560	191435	197554	326169	411596	33833.9	227268	82392	99721.8	3164.72	129908	138380	514722	51076.9	121515
UBA1189	239978670	3579920	7805932	2941520	3035830	292712480	37040870	38562578	133598830	1179.83	7522.87	1116200	232487	90977.3	274387	86395.2	59869.3	92494.4	74269.7	563116	540715	118809	235866	432474	31848.9	464181	156243	86920.7	9864.19	233959	196036	482386	105628	186451
Firm_10	238836100	2906139	4686312	4323735	2362920	75628000	62597245	33854660	104527608	/	11478.2	771874	209891	18392.3	71710.8	23565.6	8913.27	11413.9	7193.31	56326.5	79465.9	73366.5	59943.1	50264.1	12009.7	145007	17936.7	63287.8	1956.16	42224.8	44936.3	157978	16037.6	61413.1
RGIG7114	238822210	7738500	11039100	9657814	3258320	334808660	95984403	69562589	86848210	4175.07	30045.9	1258470	296454	33899.5	104118	24465	31520.2	8826.66	40569	319809	192380	225034	229080	283699	28088.4	234531	28967.1	77798.2	2307.83	114175	77559.4	181565	31112.1	65980.6
Gallionella	237194198	40971749	12693200	8766032	13377900	2174608260	325061487	37990380	591446061	4615	71021	2275677	789285	548787	935482	313541	194024	221180	247062	1071490	813805	226955	386041	570529	243562	871283	568544	1379650	79248.7	429409	303333	845345	193002	585116
Limenecus	236571290	1884120	2682460	997350	8879525	/	6157239	10188851	41312330	/	2151.39	831688	57805.5	12561.6	42904.2	12270.7	17830	23998	24641.7	32981.2	74770.2	13500.8	44041.3	35827.1	9045.42	96374.6	25006.6	67711.8	5122.4	95110.6	32340.3	98494.9	13910	57894.6
CAG_317	236431800	4259477	32961173	6480499	17827200	/	21420240	268826490	112922100	2059.77	28041.6	12996300	218508	28728.5	118504	14550.9	23680.5	5715.16	25073.5	54404	73253.7	123717	150311	152197	16996.7	103104	19901.9	98013.6	8673.08	72739.4	52806.2	118388	18876.2	80959.5
Pseudonocardia	235521145	214654240	22511925	26995600	20674200	13349528900	4983480600	211575228	2318445730	75473.3	325897	4269780	13293000	481256	1596920	393193	391558	128914	264028	2649490	1858230	2963140	1075560	2137340	596949	2659800	323646	2018680	311751	586947	533785	1322600	408461	826378
UBA1942	235245569	16852617	1670240	1221190	7476520	28999630	6635840	13637300	20155030	/	5691.84	371689	917690	44224	62771.7	33767.4	18706	32197	19469	88790.8	138981	29984.4	63283.4	26081.7	28090.1	109973	34365.2	52734.2	9316.07	44920.3	35542.8	134467	21862	64307.7
Fimisoma	234968551	7828010	53102104	7802644	5872370	59655500	49007740	157847382	235872000	5446.64	42798.5	4532900	502073	52926.2	227981	30745.6	184149	53641.3	27641.5	525682	207311	307482	383098	521998	36147.4	486241	78267.4	79579.5	8764.86	149622	115779	427242	37505.6	184688
Fen_999	234927812	42366027	6441524	8413230	17539701	9914008600	94128705	16906856	818850590	7289	17024.1	1484230	1979750	670349	234350	88351.2	20375.7	43532.3	58973.6	212229	152436	27906.9	82774.8	61455.7	128488	3916350	244951	512899	38501.7	71541.2	57848	157289	31255.7	101131
SCN_69_89	234314320	64022530	6809564	8060299	12356200	12108543000	312177530	29348360	2772880200	46025.8	46798.2	1660740	3334020	442132	708560	106468	35543.3	47321.5	120838	1120530	168867	33967.2	86183	187224	139695	657691	377494	541604	68105.1	114342	84815.7	245577	49166.4	96561.2
Kocuria	232802435	22503900	34930600	22432600	29007200	3562499700	391302150	699865514	487663304	24212.5	98139.6	5945730	1668630	84562.7	352722	279945	188426	67419.7	327087	563846	448095	414176	274826	589767	96576.8	585297	116603	377489	47515.6	153120	181352	573918	84740.9	195736
Heritagella	232415660	2659674	10027135	3617830	2306400	135214620	19297774	41253252	77942880	575.803	11445.4	1454280	293643	12385.4	100701	19022.6	9687.83	6407.8	16316.3	144443	74471.1	83048.2	93182.3	138974	6855.75	109475	8987.7	78239.5	3929.86	36269.8	31955.5	101761	16089.7	28624.8
RUG11977	231872280	10156700	30904311	7361640	7693460	408568000	115000959	102464040	486264468	/	47854.7	3559710	628304	56796.2	330806	103485	101911	51772.1	53322.5	372407	369241	297746	478389	761693	66555.9	316529	107278	76584.9	2560.91	236003	193020	552058	82173.5	206542
Anaerosporomusa	231658030	2119115	1646308	1436705	2808042	14045400	9589040	9949430	17599780	/	2779.27	201530	17177.4	2818.51	7830.25	10790.4	1963.03	6211.96	5483.09	41237.4	12831.6	27465.3	32808.5	20961.5	2070.32	20342.5	93914.6	35058.8	756.37	11435.1	27755.5	65038.2	2425.72	12653.5
RUG658	230989600	3242500	10389586	3618620	2521410	49230500	38009980	18265521	310325420	1748.28	53960.6	2792370	184483	114353	222402	107464	101009	68909	74042.6	291438	523207	211131	356961	303360	15742.3	256105	202198	97479.4	5755.45	265573	222131	597851	92208.3	274923
UBA7702	229772710	973518	3028254	5642880	1610870	13684400	15905830	29677180	23245030	/	7236.52	558185	93230.5	16669.6	13478.9	4381.76	20266	1238.27	10248.9	143382	141695	24523.6	50728.1	61445	3232.34	59896.6	11091.4	74651	1177.42	27750	21021.5	73630.3	10735.9	35862.2
Rhodoferax_A	229648300	360178901	3307131	5093840	8236298	1059428800	4078620410	8122490	160686520	22161.8	58595	1988050	359666	92271	152428	121861	18565.5	72229.8	43060.5	165543	106217	31271.9	52784.9	89144.1	44478.5	125769	115544	193560	50350.1	48995.2	58242.8	133253	18196.9	59272.1
SZUA_584	229455100	2979938	5412760	7088200	4579770	132941000	21109310	69843400	47510900	1517.36	7233.17	458918	37036.2	17329.8	20808.1	9598.68	3735.93	3136.39	4285.64	46641.9	31764.6	20082.5	42448.7	98696.3	2277.97	67788.5	13646.3	68183.9	1327	9581.9	10039.7	44063	7478.9	15386.4
JAAYFL01	228717000	841973	2016859	1410974	2145580	88085600	2905780	4959280	54902920	/	3352.63	360545	33463.3	16882.7	17819.6	9972.68	5680.75	8152.58	2176.52	16585.1	57296.1	9372.96	27537.9	33572.4	4491.95	37262.8	27641	133074	3071.68	46722.8	33484.5	68701.9	15777.9	38722.8
JAHIKV01	228646140	8128220	458524	711220	1302480	547160300	198009920	2002591	29906090	/	3122.74	39237.7	67067.7	15574	101107	69300.5	14967.9	14061.2	33220.9	80262.6	39996.5	3148.45	30322.7	22755.5	14869.5	56437.6	60162.4	105520	16294.9	11876	8571.28	63749.4	10695.4	15452.5
Hylemonella	227374480	35471067	5620541	8410610	17872489	1833199660	187789910	28308701	255860070	48648500	61078	3889000	836387	611868	290863	220688	54853.1	137496	170603	1305930	230121	127327	194208	418779	529718	640267	853082	3945945	738263	147910	208658	457993	208114	298196
Paraclostridium	227145900	7839678	38496990	5869142	3378525	78131930	155610290	190504200	631943700	2394.57	38904.3	7551464	425773	49641.3	183216	152886	107313	28318.2	44042.2	431404	251999	294229	400487	354597	53124.1	216959	84267.5	102884	2160	134315	121506	358252	48096.6	274196
QAMM01	226979000	2784169	10557538	6065753	4274518	48593700	39769870	44205430	11139510	2803.27	6243.54	806889	113521	9063.67	12714.6	11413.2	37505.5	2673.78	/	201203	25718.9	8032.82	45566.1	113882	3666.34	28003.7	14484.4	21979.1	862.77	17491.8	21635.3	105126	6006.95	29803.5
Bacteroides_E	226568560	2337760	9323370	5702690	5207264	7850830	5923430	80392824	54358600	/	3037.88	1202689	64582.4	18755.1	48928.3	79035.4	7248.05	32440.9	26588.6	121463	78111.2	34544.9	45696.1	21856.2	13493.2	34498.2	25501.3	82589.1	3851.63	32868.6	29414.4	63907.9	13347.3	42790
DTU059	225903990	10834600	35538325	12185067	7413580	172854100	76350219	194490620	522647520	1459.94	29384.3	3333650	648978	61747.5	160899	81088.4	82557.6	20715.9	33393.2	448838	227478	256552	336091	345252	21438	239703	50848	109864	6231.06	106279	116932	373299	37834.7	186547
Merdimorpha	225884830	1603760	13568300	6218980	6241310	62155400	19660515	53741912	57724780	794.219	15752.5	8447860	61335.6	40162.4	139130	47008.6	2290.2	/	46624.5	78689	168982	26548.6	53884.5	107327	3901.55	104433	99311.6	99685.3	12026.5	54844.7	56008.5	200800	36235	65997.2
UBA1752	225332933	13003100	14523505	5559420	3973830	506300300	130200189	96112442	620315300	2370.33	31352.2	3071770	783052	60889.5	247743	49809.1	76921.4	26829.8	20557.7	487794	411357	375233	515157	235401	52480.7	214370	45661.3	86875.3	5031.02	197624	136978	759650	44952.4	221878
UMGS1781	225267500	6942042	24460960	3936325	3541481	9523760	36458160	138605590	631353700	/	37191.8	4747247	267418	77364.8	121935	63874.3	151778	82258.4	113493	290508	156365	336767	323546	489147	40309.1	181343	252825	62528.1	2842.72	130250	88609.8	279084	46747.8	245027
Bact_19	224011040	9451460	45999200	5769290	7131950	559251520	82133577	79738600	472728430	4955.94	26577.2	4330500	641519	216584	457876	173731	135963	123543	131643	778989	728083	169524	393152	460083	59328.9	795124	206852	226467	20672.6	367106	236344	615431	124369	306694
UBA4285	223454500	6442465	32006091	9640680	6854470	174157400	50482444	106856330	388796940	6824.1	32178.2	3298050	532454	53379.4	155423	30570.1	249446	50340.7	24685.2	184988	195699	185889	333878	272262	32893.2	314261	38502.3	102222	4399.03	187533	100169	327137	47701.2	194139
Tenacibaculum	223098830	13291803	46003789	13084698	6349060	922786960	131624480	497288410	1059893630	4209.37	59942.8	14813300	1507500	447153	5424600	1637050	1028000	1586560	1785540	1460440	2776000	832925	1614320	2499620	159067	2924860	1545460	329737	50167.7	1226520	1167500	1775650	515776	1391050
Clostridium_A	222703000	1845840	32936400	4717770	19136500	37840500	2684700	142068000	81606400	/	25360.7	18799000	57027	12982.7	11223.8	507.317	7008.11	/	10482.9	69909.3	/	30603.8	29438.6	26943.3	2003.68	55741	11538.5	25213.6	9856.04	7356.62	3357.14	7659.84	675.932	4588.54
Duganella	222627260	60090127	9085790	7666340	16413301	3689733100	460572140	27318481	503982400	33140.3	48637.8	2711720	1346820	4172940	847800	270987	115914	178994	274045	925855	902267	210014	379900	438137	504069	914865	516712	3935250	653897	413258	269522	822168	159029	452027
JAAYLU01	222336510	1172530	36046000	11941447	1607536	124950020	18061370	265123730	71493700	5510.31	23027.5	12650400	318405	19087.9	48720.5	32466.1	10126.6	7876.43	25446	29009.2	53959.2	10559.9	33354.7	24866.6	2068	277785	25944	166279	3684.57	36866.6	34864.5	81110.7	10428.7	32201.9
Ligilactobacillus	221740882	14202900	71057674	17246600	30978000	348580560	133928912	606944488	855825310	825.385	94937.5	19376200	1503130	85630.6	344068	105990	177993	130744	143542	1528490	585883	621140	787120	891440	55095.1	784646	90135	3097060	28197.8	403632	257219	842578	84301	441148
Gudongella	221087000	2339850	16415900	2328860	9427320	558845000	7091080	190052000	18309700	/	4444.98	1674080	10275.1	3008.24	4045.51	2663.05	12117.2	/	/	22369.1	1995.47	8452.58	37075	17375.4	3999.18	66709	8340.19	15805.2	282.524	10746.8	16241.6	55746.8	986.998	10602.7
Gulosibacter	219624313	12437545	23296838	10864817	16666026	4131942700	175050740	267409990	341620900	12661.1	32802.6	3952293	2191550	100259	220432	54648.9	77487.3	12973.3	52781.2	337041	310841	156312	287142	466996	46299.3	305222	51815	160159	8469.22	161280	152555	390774	52719.1	199007
Hydrotalea	218896870	2188836	1598321	1181563	778054	931218000	49143780	10676680	120110300	1487.06	6281.91	521946	177863	324718	91503	23578.8	21814.7	18500.4	38140	57828.1	77712	49889.9	47678.3	83076.8	46482.9	116720	49102.5	69558.9	22746.3	37771	27354	77838.9	13040.9	45433
Dyella	218794510	17967844	4363870	2322340	2322140	1245287330	273370310	11629400	180093890	63927.5	25599	2404250	925915	180822	365912	191033	69355	184718	134890	320286	386877	139660	152743	261939	62987.4	430411	140969	374364	15516.4	225412	127957	417265	77237.4	200140
Propionispora	218751200	5017179	5548150	3677490	3501261	/	14719243	19893496	59952330	/	11114.8	1653380	53701.8	7430.28	5111.53	4506.23	11544	969.678	5339.48	26532	17616.4	22610.4	40339.9	36884.4	5282.99	25085.6	8845.46	69844.5	137.575	13676.8	7657.01	34173.3	1867.45	6450.98
UBA3947	218439460	4742597	14278590	3042074	1497691	37321100	40971570	82029000	319392900	331.261	15145.4	2607341	370999	35242	139709	123186	65693.8	73865.2	58987.2	513200	216972	276966	186097	186916	19642.7	230582	44183.5	20774.5	780.912	66194.2	67645.3	206483	27053.2	89613.1
Actinomarina	217942486	30982415	99920507	19834500	34689400	923827700	392141910	415613540	3558756690	61206.8	298132	15065400	2569790	387280	142444000	34532300	89823100	32941900	24062355	541300911	55331000	132016094	160785268	353464117	366126	16642300	20758900	588556	38816.2	42663400	91307700	124812000	33753200	139209560
UBA1792	217833000	2945960	3308370	1604880	6475440	/	1071290	7767250	179835000	/	12432.8	860706	21778.1	18533.8	20840.8	/	/	/	/	98332.4	23656.7	65378.6	25299.2	27194.3	18324.7	9268.41	6947.89	17837.1	747.405	9709.9	9499.76	41142.6	1765.28	7400.3
RUG14156	217770030	2887760	7010171	2013560	1727062	12832700	40001680	24929230	219067161	642.4	18515.3	2839860	199132	103770	422706	112825	47490.7	144036	126547	350893	271675	132146	289820	533883	31557.8	281294	99864.1	84132.1	4457.6	203113	154484	512862	77814.3	184660
Moraxella	217762870	7666500	222681716	126682269	90431042	809133930	74454407	7509667200	311978300	135985	1294900	456211224	586188	193909	224234	214605	94883.8	266261	141247	330837	474736	153808	273989	201551	37719.4	500972	146840	93723	13124.9	205839	195292	540273	114736	308501
CAITYL01	217761000	3942160	358832	1128310	1143370	19654200	2765920	1153280	8532960	/	1313.14	41186.1	14930.2	7748.46	11108.7	2568.83	5349.87	1632.57	7116.14	32627.3	25669.6	3861.46	5979.27	29012.4	2288.08	13621.2	8595.46	93301.5	1898.76	9496.01	7159.41	5921.45	8010.71	4617.53
Fretibacterium	217500517	4700400	9471210	2958910	2943370	339242110	81492195	31411300	393057091	1269.13	26090.7	2462600	321637	187956	546563	193081	154585	178539	150674	531127	837814	273301	532550	572515	52804.3	541032	198985	176043	12373.3	452883	406095	957069	162246	373646
JAGVVH01	216712000	5001970	5314460	2662320	4260670	656372000	17718000	28339300	244943000	251.402	3424.68	985321	147481	161049	21223.4	91653.1	2266.71	5694.71	20642.2	52490.9	18104.7	16483.6	20603.8	40929.8	28327.1	844471	62617.1	80058	4091.22	25292.4	14457.7	40264.1	8161.1	35674
Pseudobacter	216611400	1329250	1495930	754637	365442	371059500	41441190	9245880	146243500	2135.98	5407.04	260173	688032	54356.2	85309.3	37940.5	16459.5	10003.2	23337.7	93492.9	118227	34219.6	42075.7	54554.3	24930.2	97518.5	38761.2	125167	11083.2	67173.7	30646.7	125205	19698	54395.5
Anaerobium	216486000	3008450	36516800	6417810	10424300	55009000	7045050	199688000	23859200	1181.16	3080.35	2429030	173733	16551.5	21642.2	7493.65	6954.78	493.579	1054.07	7607.92	30593	37719	53235.2	/	243.189	21020.6	2726.02	41969.3	1200.74	11774.5	7571.01	25881.1	5998.08	15619.9
CAG_877	215792100	12509109	37160243	7429648	4871999	163648000	80650070	193391230	1257938700	2854.4	50358.6	7373439	887079	83117.2	519212	222382	188853	61350.3	90220.3	1217030	387144	753578	692158	949338	61717	348372	196493	113401	11698.7	238031	205223	776400	100183	251742
Excrementavichristensenella	215564200	1542676	1449869	2350032	2285924	31261300	6345480	6966700	3431778	826.346	2544.96	70247.6	93749.5	4955.26	45819.3	1894.39	/	/	11323.7	20956.8	26261.3	54991.9	28389.8	19738.7	4126.96	80752.7	3167.28	33756.9	1462.46	24390.5	15271.6	23525.8	8275.26	8432.57
Acetivibrio	215195188	10539200	19188983	3854201	4202990	5536580	52803876	43133464	169185161	/	13225.2	1138490	248792	16552	70448.1	22691.9	51865.9	14801.7	10640.1	175017	162729	119121	141152	98011.2	22207	96020.1	25792.4	35269	2123.69	44944.7	30559.7	131036	18145.5	68727.3
JAAYTX01	214166000	878013	336693	297237	408328	/	2755930	408779	2226520	/	844.418	38936.2	35439.5	6903.96	19400.4	/	/	/	855.479	2802.35	6861.13	3712.48	5614.71	5940.53	6175.03	164998	40787.6	111280	1990.89	2499.71	2035.99	13252	4129.62	5077.81
UBA1447	213613510	8616678	5292362	8350140	5284955	558675700	16643200	52317100	78866100	2421.88	10349.5	1019138	60879.1	28275.7	94832	3069.97	21206.5	19568.3	14600	292968	38968.5	78037.3	56895.6	60878.7	20690.1	141502	23230.1	201259	393.7	41717.3	28319.7	109910	20434.5	25144.2
Rhodocyclus	213474900	16351803	3012909	5723500	10868300	377847300	46615130	11905572	142601920	1001.84	8615.51	932268	101042	97411.7	60699.7	23239	28953.6	22979.8	53600.2	76867.2	76979.8	12493.5	51774.7	78637.7	23311.3	94812.3	79437.4	185439	13116.3	47526	31476.6	90724.1	21851.8	37094.3
UBA4716	213282800	2601207	13130766	3465175	1774358	154270400	6205377	35155010	257700800	/	13904.7	1579500	88494.9	22867.7	116113	23052.5	50512.7	31623.6	23623.4	264595	81023.3	210977	119287	84235.3	2485.68	74178.4	48586.1	17978.8	699.429	83320.4	27928.7	135229	17700.8	73375.1
CAG_417	213062790	13726790	33444303	7774206	5753122	255078300	76395539	142629570	1332484660	7689.29	41209.3	16578100	722036	62558.5	166858	117360	345403	28828.6	78100.7	568406	351319	716102	402276	494957	30510.9	358250	58601	68605.7	4186.98	171238	128293	337295	48535.5	291848
Kineosphaera	213009000	3676430	25476300	7057590	18634500	2047260000	33255400	241147000	54244000	3499.9	13435.6	2662440	241532	23943.9	20292	7035.98	3984.75	7871.71	6823.19	37713.2	25914.9	33623.5	23031.7	19850.5	13784.3	96815.9	8340.3	9233.81	4145.19	6203.53	9973.93	46515.4	9791.65	18026.3
RUG591	212861220	17458417	42672944	11083340	3239112	25941600	201302620	114745290	1264400800	5321.89	53293.5	11542946	638136	109418	349300	147948	260967	76182.3	62862.6	885707	321969	638526	655120	553159	52528.8	306133	113795	116148	1846.51	201065	169028	430204	59034.7	254520
MED_G11	212428300	10399600	33175290	5961270	11908200	1085890900	127874461	68670288	1440009050	35671.7	79697.1	7674990	921779	989096	49439500	12303800	29850300	19069100	28663200	43946045	34820800	9166190	29865600	122119243	287523	7357720	26453644	644817	94490.8	16822800	28794100	33426800	32427600	70822600
Mycoplasmopsis	212304706	33046795	96833516	32574995	7587903	817653300	541064530	390362870	2685074100	5344.56	175432	20226700	3085970	324464	1486140	426182	724382	244356	356382	2169750	1352790	2168090	2331540	2318220	205665	931498	339501	404235	31404	842486	768571	1697400	331710	887783
Haloimpatiens	211518600	3452370	18570260	3420564	2994092	10480700	39565490	127508200	356302100	/	15329.3	2014003	397737	24203.6	75457.3	24606.3	42568.2	14795.7	13160.5	183955	123396	147263	154674	174955	26646.9	133838	45799.5	24795.8	321.13	132183	55662.4	134023	31559.2	95958.5
Pseudomonas_D	210979210	16155600	415623775	36259592	13541900	2061664400	167963697	505856040	496868680	27421.3	127172	117964000	1314790	247465	1735560	681118	326877	390843	1071210	1612700	922460	211322	425161	812945	91014.1	3207070	356741	521115	32776.5	443892	354966	1440290	417537	1050640
HGM13006	210027400	4859042	15535340	5329156	13940300	182274800	39354950	125730780	63311050	1231.09	23695	5450150	243108	17255.8	74461.4	9966.19	73856.8	19682.4	22068.4	156856	87068	95347.1	146206	171983	15152.1	221697	21498.5	62092.9	5204.89	46833.9	30268.1	146312	9200.75	46183.6
Victivallis	210025160	2885711	12396276	10628232	5822020	223084120	30386173	20253856	21449460	502	7694.96	3841270	205166	46851.9	77177	47676.4	7874.63	11762.4	43073.8	85821.7	95334	19429.7	48362.5	74539.6	15535.3	136681	68363.1	254046	28029.3	48472.2	39613.2	163183	23413.8	45629.6
Camelimonas	209687630	2114850	891734	848063	2498997	423676600	42692692	6837110	60969968	11952.7	5181.86	641688	343222	45903.3	87716.7	28262.2	17744.7	6876.12	40687.4	127421	58195	18850.1	40385.9	69993.4	16016.6	104690	34996.5	98750.7	8019.18	21518.4	29513.6	53361.7	15402.7	35553
JAGOJY01	208989000	709295	502294	130873	289675	225292000	16610700	712098	2702400	121.591	994.856	79886.4	30047.9	7237.91	32819.5	20263.5	/	8656.84	1379.49	19376.5	18467.5	2265.11	12178.4	4974.01	1550.7	23977.1	5718.9	16737.5	1745.35	3600.89	4702.73	18784.1	2960.43	5384.23
Didemnitutus	208977640	22881564	11917864	5080466	9475354	4281189300	209871360	14449892	113767200	558444	14349.6	1478720	5449610	508754	179835	43760.6	84833.6	142878	37026.7	214783	228701	46454.3	91978.7	344766	435695	442618	652116	2279750	142030	108157	106918	251008	29628.1	73696.9
Agrobacterium	208509483	9351740	10739400	4752060	7402210	1467805630	177271835	30553500	259476064	25179.4	28916.9	2506910	751147	322109	682898	231032	129416	219443	152843	625125	606713	156386	264259	400713	104320	610380	256813	1957420	236551	347543	249921	789410	103092	277577
Muribaculum	208495110	3322070	7146350	2885110	2656620	287672710	37253046	25075927	185106450	4392.47	16679.1	1541730	356298	74125.2	373218	129226	60852.7	27580.7	72609.5	367044	311160	53862.3	219361	313919	20272.5	288011	108081	87441.3	6124.06	151690	163832	389354	81209	177803
Faecivicinus	208450570	5313533	6522647	5185678	2667973	160654300	42094140	39581510	25615857	/	30307.8	894222	198029	17369	53236.1	9349.94	18547.1	7896.71	6376.98	35893.1	37572.9	30572.6	145495	143381	8588.35	43192.2	25915.3	75750.8	5042.72	52215.1	28342.8	136960	22633.4	55570.3
UBA1258	208384490	7043553	27954914	6233985	6115080	164007160	63548826	86377550	203158000	1229.05	20360.4	1321390	363872	50508.7	175167	39923	99375	36472.5	31869.3	265990	211946	264099	280650	379018	23737.1	216085	24135	75464.8	3439.29	194015	148754	653927	37113.8	199648
WTXA01	208096000	1698940	10220600	4126960	22975400	/	5514120	36920200	87882900	/	5738.95	1524830	115377	15802.1	49166.1	2961.07	27804.4	7032.28	8773.71	18415.1	53144	3722.47	102530	34305	4407.86	56211.5	15196.4	55611.6	1080.82	25270.3	14176	65585.2	12939.8	29009
Longilinea	208094000	2615290	211830	795884	5697060	1179230000	10064500	1700470	23131400	521.359	994.98	197715	6670.92	910.607	31053.5	8911.51	/	/	676.359	30545.5	8281.6	1317.59	5589.22	7013.01	1903.6	18397.8	22779.5	19329.4	1104.3	4446.63	4298.53	20221.3	789.044	8315.65
Obscuribacter	207561141	1576410	2442371	6633456	5992810	30974651000	18768440	17467500	1644524700	184839	12007.7	1998180	2808310	414646	25271.4	30463.5	4846.01	8204.44	18306.5	62576.8	85100.2	17551.4	50755.2	47583.2	146387	1079770	104853	230394	16140.5	51554.8	27387	118436	15444.9	43995.4
Christensenella	207160500	2944820	7302539	6646601	3440151	76338900	21133520	82343750	114554530	5912.01	10230.6	3897735	191071	21150.1	34846.5	32791.5	51329.9	17419	10108.4	39866	77537.2	84718.1	124677	134016	19809.8	81525	32016	51766.6	1563.67	78116.6	34911.8	114489	14269.2	105274
JAGOFZ01	206761555	1948052	904682	1626303	3854642	304843500	13507330	1866972	159722700	3140.68	3594.7	64959.5	19241	17883.5	34762.8	28846.3	10972.9	/	14283.9	125291	18099.7	828.307	24673.4	/	5797.84	90209.3	12871	17866.9	1151.22	20567.3	16500.5	31314.3	5320.42	15394.9
SFMI01	206709510	5696570	8763525	8272830	3207140	172191820	73867860	55142879	90305600	4647.62	24559.4	1060800	457978	43103.8	92663	30040.1	38070	10237.7	18142.3	179329	102154	197608	196156	162556	15961.5	120926	19827.6	70593.2	3951.21	73726.5	72220.2	672414	10657.7	64383.8
F23_D06	206449856	6662140	13606800	3597270	4814170	521653820	97579605	28377616	497228113	1077.51	31050.1	1705060	907830	215838	826951	319028	137248	267751	366676	882840	1317450	308943	538045	866841	69509.6	801255	244595	202167	25085.8	574390	428736	1036450	203391	551837
ER46	206195380	19970605	15573408	5151020	6009750	46937304400	521390890	20513176	409634840	13928.4	39502.1	1230785	2986968	647260	466110	180620	139905	217886	150389	909568	409679	127049	280841	443149	1251080	1103560	1506390	3420340	200961	269003	198599	490866	73119.5	309611
Malaciobacter	206134110	11319256	476750800	52954710	14732378	136235980	53453320	3260488900	283212100	26181.8	264794	363917900	227664	114391	375044	157572	70861.5	84821.1	198373	306617	304866	134650	277629	333858	31342	2690363	219430	157573	9278.62	282778	165236	351395	78106.1	311576
Spiroplasma_A	206092070	27298801	79146630	20929100	5793660	364215400	201779905	352528560	2730011600	9594.39	143619	16724409	2267260	176673	1154150	407259	655230	183369	228595	1448610	857054	1846890	1527050	2650970	170630	658906	262417	338034	15059.5	521210	497774	1334690	184578	706706
Gemella	206053880	17073753	60254820	18755659	11518500	360497100	118389460	343130220	1319812500	2863.6	69498.4	11885603	1849930	176814	1225010	160343	556515	170484	230268	1462700	600413	1140740	1158300	1123690	137292	513518	375442	167257	9446.03	375902	310048	886225	156246	425785
Pseudodesulfovibrio	204875147	11537223	1782238800	102145119	5411880	366196390	98711426	2128671100	271854240	4474.63	67280.6	47364233	655953	70237.9	257052	98793.6	66296.4	43944.9	74698.7	280970	248706	157161	220607	189973	28177.3	1168210	92208	132880	4858.72	169616	120137	453565	46381.7	295823
Sulfurovum	204716769	12218600	96365531	27630081	10645600	147516970	42950979	171526360	500982980	6404.38	92528	48228179	415092	456130	790903	304946	740544	1672390	200583	589167	732202	323784	728101	539990	75826.5	33118300	427738	220321	9363.92	596176	391190	1109450	226570	678503
SURF_16	204665290	3451490	60141545	10959400	5632820	90304100	19787015	38400921	125196477	2029.46	10065.4	2150970	225942	32305.8	109748	36790.9	15787.6	13946.5	21440.8	252604	86812.7	88483.1	77649.5	76727.1	8637.67	116445	18510.6	190226	2351.83	45496.3	41016.9	135830	14299.6	85261.9
Coprosoma	204547860	15624988	58970260	10445701	7904629	340821600	79661840	229963150	1416123400	/	52674.6	7592907	1008010	84910.1	415145	193106	513898	105641	139092	882289	660846	1169210	772411	714338	96514.3	483884	155297	94724.8	6633.87	179779	280655	669357	81393.1	369882
Firm_07	204187247	13905978	17658900	7604100	2226040	577094800	148237194	58672015	422155480	357.672	44302.6	2609190	897743	44500.8	115537	66738.7	94967.9	17654.1	27553.2	409616	221649	187091	316394	571206	43646.3	384857	47282.9	126540	2074.6	232536	168849	442320	35475.8	222354
Cryobacterium	203936402	50727840	23049700	17534300	14609000	9358486800	952692880	234876882	1099893540	16469.7	123140	2832580	2969910	231844	837401	347133	283033	101079	195899	1421800	1759150	1007030	1049490	1949530	220070	1310320	171382	497577	45947.3	435326	412808	1066970	210283	478523
Tidjanibacter	203870333	3790220	8921000	3998150	6058930	523580400	51499792	34477334	260825416	1832.8	18705.3	3540600	304282	103910	469449	154441	92681.6	142447	104514	336519	454841	197590	268186	316276	34215	425684	249767	125436	14280.3	275788	212402	477361	75577.8	276003
Dietzia	203344871	25485817	72517209	24147300	5834110	2244220100	366823920	497733080	664137270	17732.6	91518.7	14165400	2947380	104884	512669	94616.2	172826	31168.1	79692.2	535028	453873	331841	318466	766059	59278.6	675005	110693	252637	21218.8	172437	186026	587283	110880	204877
Lapidilactobacillus	202976030	4180432	8067432	1848240	17116800	489409000	28490255	93187120	145044200	/	9824.24	1300640	121715	24055.3	113701	20985.7	42142	6558.03	10426.4	191417	122041	173027	148256	233329	9755.86	396383	35620.8	41439.7	414.953	69279.2	62202.8	177509	26901.9	71880.8
GCA_016699305	202905000	1023990	2431390	2638940	3921070	70785900	11379000	8377040	6910930	/	2549.07	604139	264944	23097.9	18806.9	7287.34	38851.2	45796.6	27940.4	18740.9	19605.5	4408.79	14539.8	145894	10368	32262.5	113954	106287	5809	11478.9	2079.56	10132.3	7968.21	28854.6
CAG_582	202232830	10520859	40661300	6962593	10283411	50905300	37804180	130735640	624097400	2459.72	65019.7	6337674	762633	68432.8	500650	81329.5	130045	22600.1	83713.1	392202	349900	338880	595641	349371	54369.9	483050	94532.6	80135	1444.34	137793	117797	397345	50799.8	207814
Pseudorhodoplanes	201945400	5437136	1107357	1556693	3631043	6988779000	171031440	4548427	234874080	12517	15389.2	356459	936104	86462.3	119286	21014.4	10965.1	13978.1	14866.9	82025.5	80487.5	18718.7	43741.3	56652.5	129819	142873	82574.7	547861	66458.8	84834.1	35141.1	108827	15298.7	73979.5
Limivivens	201842480	2871115	21943500	5439660	20154195	31989000	34687720	128484840	154698900	1105.13	24806.8	10574600	182549	19775.9	54232.8	39427.8	44227.5	20847.1	13402.1	151227	69279.4	156206	79103	161529	17019.1	95546.7	15515.2	53909.6	13963.4	25322.3	35812.3	128446	11810.2	36634
RUG13868	201708190	7380370	51408070	7317260	3042560	404477700	149711990	128806200	947118700	4837.73	42784.9	5205246	727015	156455	241803	241625	173741	87025.3	47028.9	426662	306424	631661	360381	445048	48081.8	165373	49292.1	53869.7	3485.48	131052	170886	370546	58231.6	147619
UBA6985	200801400	5542434	30711790	7856322	23999256	406650100	82177190	124446230	718956200	550.325	26266.2	8178871	833275	61868.7	208733	82354.1	147430	19568.2	97809.1	544085	356650	385882	482802	483017	45725.9	359382	84977	118480	5084	146886	146310	319856	72154.5	249689
Lysobacter_B	200560970	14533644	12753523	10256395	13987046	4776080300	150560110	136068575	119742610	40556	33853	7252460	668230	313327	471492	201241	101271	78050	73295.9	309728	355729	101733	134686	209542	68273.2	273928	147600	243162	34653.3	108910	83276.4	316237	44663.7	129053
MED_G14	200366240	11341836	31620580	6122230	11999300	1291729540	106597259	75153175	1388541640	23492.9	75266.6	9024620	1292180	568306	153507000	27636200	136228000	92316000	40786200	12519300	52958000	24533300	43315700	129189000	279690	10550100	43405400	625111	70517.5	21474300	34413700	23349900	12508800	111937000
Weimeria	200027280	3274950	13609723	3856530	4084734	94286600	29741690	60778942	134208740	/	18576.7	2070630	388659	27862.6	154334	32327.4	105730	20888.7	9575.8	361685	142018	152760	232777	285394	15237.3	109390	25487.6	46419.1	1259.57	98457.3	81063	209289	26780.3	90300.5
Agrococcus	199453220	38135065	18924763	11343429	7203340	3832710000	638743200	235970950	641278440	12056.6	92426.9	4319670	2435180	115155	781709	196925	119847	82901	92762.2	837718	487839	439884	409792	1003120	162231	740952	78228.2	1459790	38935.8	287734	251635	524970	123253	288218
Pseudoduganella	199338230	36479372	7523339	5540892	6815179	3299833100	431163590	22820472	524462920	43096	53363.1	2243570	1152530	2878000	790903	243342	114704	110957	230889	635976	649202	188189	334494	543593	262465	822081	360568	2656490	198983	331294	254265	731912	137136	325346
Aminivibrio	199318400	1140380	24168573	12083100	1075313	65182400	9580123	197087500	26685232	3932.54	18340.5	6723740	80989.2	39160.2	14283.3	20839.1	14269.2	5789.41	28704.6	83477.5	99717	40269.7	48670	35614.4	5639.14	212956	45193.1	126322	2354.37	49627.6	56710	153300	12674	44769.7
UBA5884	198769900	4439800	38488571	4109995	7697608	158604500	6801390	52420740	51404710	/	13958.9	1270983	162177	14874.7	75007.5	87758.8	19596.5	17282.5	30910.1	184363	52776.8	178649	83604.4	131773	22554.4	67153	40752.8	16234	1617.75	51768.2	46887.3	165354	22035.6	54782.9
Planktophila	198361960	36118481	67578700	19594800	7003440	2859155680	508314170	573041715	1385618840	17972.5	145078	16846700	4423270	351057	1063250	946821	878643	204814	456733	20703773	1300250	2354270	2074220	2763440	2730180	2635210	2222380	560424	309596	1126080	816661	2316270	306815	1391260
Miniphocibacter	198224100	6143015	25197293	5943420	3705842	398161100	55803770	99996630	358833220	9298.52	18210.6	4049900	564271	65661.6	89038.1	51807.3	118672	21436.9	41808.4	276836	192732	198648	316751	240203	23044.6	423371	76493.1	56636.7	3054.1	90058.4	89051.4	216685	44671.5	173066
RGIG3102	197372550	15189287	38492776	8454610	5914480	340835940	98048472	119493620	534775380	4155.67	33674.2	2863670	1146950	68064.8	382854	195525	140589	44789.9	125778	996925	440460	417208	548674	571575	59841.4	385036	151212	135958	3710.52	231556	291417	580467	106299	332100
Porphyromonas	197264017	2656620	5630420	3670368	3874750	209136900	50259864	28632800	185325091	1443.88	21732.7	1281530	331723	91919.6	371647	136666	136881	109475	102230	456448	464694	101719	201036	236221	50179.6	475427	162604	86093.6	9467.45	232833	174887	598914	53525.7	233687
JN_1	197203695	3470600	14420800	1271811	1566698	118798000	37164241	65816538	192068800	1032.82	11478.8	1036789	213474	18953.4	54329.9	19652.1	47260.2	12068.5	7449.39	65574	48429.2	74763.1	183399	109712	11663.8	47377	13969.4	32098	1635.93	45738.9	51753.6	141355	19157.8	50706.2
Phytobacter	197007770	2407400	8095371	8621653	11569100	180546690	14240850	30020468	38525950	2481.18	15519.4	14962620	79007.5	26959.3	58933.1	57217.9	10260.9	13375.8	65374.8	62762.6	53266.5	31822.7	28042.6	45463.5	15312.5	83478.2	34770.2	153725	14341.9	32202	19258.9	85056.6	12941.9	35760.1
Thiolinea	196930070	5920270	9577290	361683971	43096556	709389980	49767739	83126240	43370725900	22020.5	20832.4	7132650	313493000	578062	120079	43519.6	22137.6	79765.4	77786.7	212763	257180	77285	98784.6	78211.1	24503.1	412495	45005.2	58986.9	52521.8	102438	70988.7	433748	42233.4	125981
Pseudogemmobacter	196811320	3965900	5475710	3763540	6549720	454677700	48692910	34438581	373254240	2850.38	12579.7	3178960	287946	66643.8	186921	62980.9	45187.4	102656	340959	130613	121868	69218.2	70040.8	86647	46437.1	333530	178238	158347	31764.8	83144	59619.4	196385	79276.6	67871.2
DTU078	196748300	4543480	3250116	2612608	1258855	/	41376550	15353265	56654900	793.774	7641.33	276409	120676	2577.74	17422.3	/	7625.99	/	1476.26	11270	16024	/	13878.7	31760	8835.29	49801.1	3862.86	24083.9	1941.72	28377.2	12954.9	32327.7	5970.93	31646.4
Synergistes	196251450	594319	665540	762331	2893273	/	2540320	3546016	8756580	/	3223.02	174850	13865.4	8447.97	10597.3	2086.81	6180.11	/	10868.1	42362.4	25139.4	1783.6	19546.8	33876.6	1342.99	8847.51	112571	150563	1885.48	9372.56	17621.9	68903.5	12915.5	6211.88
Proteus	196138770	5199070	34541112	17263400	15176000	353681240	43483700	112691351	316138340	4577.14	29281.8	12243700	425755	127891	382480	275962	114654	150437	356815	442776	362266	144394	320929	258386	40066.2	462032	205099	196056	13112.2	277503	205882	431924	143158	338914
Sellimonas	196133690	2055376	22163370	3674040	16378102	227406500	19824450	198156910	157955830	3282.56	26004.3	8193290	138980	13269.8	100605	17021.7	33791.1	26313.6	13617.9	128910	100793	107735	107888	68751.1	11339.5	80965.8	29436	47627.6	5753.93	58103.9	62976.6	222064	12176.9	56841.5
Alkalibacterium	196131070	6420257	26763675	6303820	18609500	69224800	50469995	227134430	446203850	3815.58	29215.3	3197580	680816	29547.4	174814	94725.1	99471.6	49008.2	35575.3	438405	212672	475207	290652	171377	22855.2	434923	47416.8	76405.2	4259.23	111499	98499.2	318102	54664.9	132537
Brevibacterium	195891841	36407334	55706400	20577500	13270900	2663171410	570320240	752318643	1033391332	20565.1	103419	6084980	3544750	141713	668067	251872	168549	64328.5	143474	1192050	776212	881105	698998	1429860	132083	911481	119463	421743	21108.8	397028	346526	1152090	170691	389456
CAG_390	195660985	6561520	9764934	4158010	4110000	410522840	92778430	76625979	447243410	4563.48	21981.5	2292140	787856	38436.3	162618	48524.7	38342.3	41250.3	27606.6	211089	313967	283049	489734	403072	31031.8	309704	74131.3	107712	4616.61	137099	83808.6	348099	52915.2	159090
DUOS01	195624920	2741936	184374196	2816090	1264230	107935000	4508903	46132453	15400780	/	2267.64	650364	45191.4	18367.5	5775.83	4278.39	/	4939.66	13839.3	6648.02	44099.2	15109.1	34712.1	20991.6	/	103158	9210.22	5095.99	357.443	26587.9	6329.44	14742.4	4274.75	13112.3
SFTH01	195582620	3769167	2865950	4155306	3326421	39172670	23944250	30635477	102699560	246.01	8245.84	783241	325919	14014.2	93779.6	40616.7	8402.31	4234.45	21645.7	127370	67478.5	36092.3	61891.5	161053	6664.68	74300.5	15029.3	117469	1396.07	30962.9	25761.1	113814	13255	19771.8
Pseudopelobacter	195480290	62994100	2934300	5436020	5979495	182638800	20375500	5641370	94599670	/	7748.01	431087	51351.2	6723.8	23814.5	4921.56	4803.72	/	7100.83	38553.7	20831.9	22228.2	18071.8	23835.4	8876.09	27526	54807.8	506855	3588.55	10907.7	9123.24	23957.1	3857.07	29299
SIG32	194640000	508925	2663030	1507550	1047110	/	4543260	8015930	7188420	/	1825.44	2031660	90881.4	5528.16	29869.3	/	2113.24	11237.4	10113.2	33630.2	18762.5	12131.9	35774.9	12163.6	6348.73	25684.3	13552	27374	452.748	36533.5	9519.84	25538.9	5292.47	18580
CADEFQ01	194201260	13644865	1522894	2844910	3150994	228895639000	259271510	9171175	558926700	6361.14	18933.8	1683890	221291	108239	280988	90923	9725.87	59270	55675.4	260674	100817	54653	49831	238747	40355.4	148492	70307.7	201808	15764.9	71026.6	44579.3	89989.5	26674.7	33735.5
66_26	194014000	19221500	1105170	3692390	12492400	151110000	15097000	7628650	57610600	716.333	4326.85	723415	89529.5	38762	30496.6	9337.15	3013.63	4220.33	2652.69	26161	25221.8	11136.7	13068.6	25775.9	16373.6	34747.9	37827.3	161710	6106.52	25586.6	13017.2	38732	5175.98	16563.1
SFDP01	193941030	11201200	47392379	8109146	10820373	257076300	54271420	176780890	381651520	/	30167.6	4077800	492522	56876.8	229055	82588.7	118470	42775.3	42562.7	307165	141728	400861	419702	407166	34080.8	240331	59026.3	72842	2924.49	148783	123256	490827	49703.9	165610
Erysipelothrix	193524240	8424420	41087970	8552829	10907378	64915840	66211070	186606840	836147510	6864.38	54256.6	5424960	765284	92036	344805	188138	169402	44384.5	112169	892419	313687	558960	512597	724178	49467.8	367554	74358.5	141487	8706.48	226670	173596	612478	99564.5	272568
UBA1943	193239061	39203347	5895570	8618510	25787874	268690200	37255361	51604674	112673700	7343.28	20317	2995630	188770	791303	135894	47755.2	9184.56	24577.5	58636.2	140776	45545.8	24959.9	48471.9	80240.9	172334	414446	176012	219456	173850	57272.4	51706.4	186457	31299.7	48698.6
UBA3818	192826980	3878238	14795400	3359970	4722336	183992300	36366070	32492443	60646220	/	9790.73	2276690	226147	32997.4	60200.2	26353.3	16016.2	7999.9	14398.7	176881	89134.1	107839	108044	218443	20698	209529	5272.39	51317.5	2813.54	40181.6	35658.7	97812	12116.3	39863.3
Turicibacter	192643224	5804450	18015759	5332130	9485600	186527400	473964380	614272240	300641840	529.986	44982.3	2626849	404908	38209.9	178932	47030.6	70159.3	32804.4	25709.1	411828	175958	410442	262259	246468	47261.8	300115	52952.1	83752.7	1142.78	83151.9	87895.7	225303	30159.9	143086
Arthrobacter_D	191393731	37270799	23661600	13289300	7565440	2972241300	656091940	353721594	821675100	27512.4	86229.1	2315590	2264630	148625	625711	207190	218001	52781.7	120930	1705600	2567850	755827	708733	1604540	190582	895508	188577	419664	25245	447709	331911	872923	197881	500228
Hornefia	191075260	5953670	9796733	7000066	4329133	62447400	28515516	69309060	213154060	/	8906.54	1341180	269589	56181	59548.5	28793	11017.1	4509.99	/	196617	144514	94597.5	177753	88947.5	8753.59	75059.7	18688.1	59419.5	2241.19	82850.2	55614.3	140587	17329	116506
Velocimicrobium	190725800	3059451	37347430	3811110	4105580	18838200	12275740	171413964	102093600	/	10221.5	2162309	123912	29990.2	44896.8	41866.3	8142.04	10598.2	13991	114799	117178	116601	198001	182880	9815.29	78016.8	28137.3	37464.7	1097.45	47502.7	26436.2	90325.6	14578.2	51434.5
49_20	190700510	2169180	644602	6955139	3949430	277709100	14435400	5483473	63538175	2667.72	5148.35	179658	53355.1	55543.7	61179.2	11892.9	9579.74	29315.8	24462.3	183575	120377	12203.5	45283	67739.6	4564.65	161185	43824.2	187858	323.738	39137.3	32945.4	154119	21234.5	31015
Campylobacter_A	190548006	4668490	41685683	9728740	9351180	437756050	61362169	97584985	641695970	942.771	38663.2	13354600	714779	210267	690462	216546	216100	221912	145823	417510	572336	253602	555268	333320	34984.6	1129800	251380	248967	9612.23	492686	329420	853441	159792	375576
43_108	189933000	710335	5325930	3183250	8464400	19199500	2449550	17450700	22972400	1258.39	10960.7	6058460	28511.3	10979.2	24038.4	4292.9	2909.45	16794	2054.33	12356	31606.8	6834.41	20940.5	11933	4341.43	38616.4	12185	14854.1	7821.5	8643.29	7944.98	34947.7	6278.1	10412
Aquamicrobium_A	189847866	5823210	3604010	2493310	2519900	741181000	121438735	19668691	208165150	10175.7	15688.2	1228700	542445	100305	333996	58496.8	32128	59120.8	72749.7	225602	155849	42165.4	83558.6	107850	36012.1	421525	95164.3	260112	21203.5	108268	101486	251070	50692.7	90933.2
Gallimonas	189555340	12891500	19927600	8369420	5687090	739743900	124296168	91728790	244134900	616.443	49234.4	3905760	1374020	70580.2	164668	42872.8	52999.4	40095.1	36472.3	477730	343161	371036	550426	433470	52255.5	357214	66651	130408	7853.96	399936	180737	576655	55911.5	285047
CABIZH01	189454000	692080	3596250	758981	509176	/	1418560	12806400	59133600	/	5341.14	473853	57291.5	8468.78	63671.3	5805.65	7819.62	7146.98	3389.12	15092.8	15599.2	40409.1	36306.3	74651.9	2931.54	588609	11319.9	14620.7	/	26322.3	14622.7	43157.4	3815.39	7706.12
CAG_1427	189116842	7704580	33752200	9606340	11440900	120989100	91059003	145037400	390321640	1769.2	78579.8	9343550	669507	60062.5	340287	77120.9	146539	86034.5	37896.5	325049	387509	395015	355710	844298	61745.8	282294	74802.1	92251.4	23944	160134	156923	418137	62142.1	208962
Niabella	189113810	3833440	4139110	2416190	5682600	1820047400	87407794	19714329	373268450	3244.32	11527.9	813465	623545	130852	108825	33053.7	39225.6	65027.3	34021	195145	131402	74049.6	158145	68770.9	45929.5	157449	78683.5	277692	25899	117314	57309.5	167829	33521.3	95694
Curvibacter	189010810	20078911	2959093	6228914	16965247	1012745200	107885090	12526258	116903387	3860850	17845	1176720	460933	267810	199234	61746.8	43314.2	34953.8	78233.7	411863	234996	60766.4	121173	147832	205989	225097	263768	428536	404298	124429	68925.8	234796	51931.8	90820.2
Hungateiclostridium	188646970	6552470	18163594	3170549	1818110	35549900	63052797	62570520	386947900	859.743	17971.7	2106251	468881	40912.4	102336	39213.3	167176	26841.3	10088.9	147597	330924	291186	413994	251342	28967.2	169558	54802	73515.1	1437.48	123262	99411.7	280842	57022.8	114322
Aquabacter	187679850	4495840	1556302	1562960	1972808	500923700	87500390	12704985	74394000	14314.5	8697.62	1067040	831343	66171	119002	40190.7	20028.2	22252.5	36369	117850	80347.9	22581.3	207220	67561.4	35846.8	148781	53228.9	121521	14103.4	55526.8	40176.6	152212	16965.8	60127.6
Fermentimonas	187468210	3132470	9051183	2446040	3292965	324443500	35306972	36265449	212775400	328.187	12847.9	1311690	194346	57261.1	205608	121643	42100.6	82210.1	93829.3	199738	371841	115087	143295	189173	19696.2	240260	124537	70013	6727.45	98756.8	105622	315779	48463.7	106632
KH17	186754000	1098250	18622900	7373520	12177800	266403000	16795400	261181000	7315280	/	15129.9	1929430	62013.6	4457.17	3552.13	/	4085.97	642.386	11054.5	74388.5	24825.1	95059.2	16883.7	18061	1357.12	10433.7	4375.74	22594.8	1589.98	4041.49	4531.49	20006.5	1087.19	9164.87
JAAYAE01	186733000	887346	3830860	2912670	2842970	67486800	1501900	64858400	61593800	/	12064.4	3554740	116786	2313.87	/	672.532	4451.36	1397.09	/	104699	16342.8	35697.8	28285.4	21106.3	2522.16	/	5376.74	35925.8	694.234	5821.95	6808.88	21209.4	5590.86	8625.6
JAAZBW01	186691000	786834	5010950	1388510	2493090	208927000	11170000	70423600	/	1673.16	4080.78	778256	78252.8	722.893	135525	6118.56	/	/	13101.6	10157.4	8739.21	17935.2	17889.8	10004.7	1666.82	14926.8	10152.4	1999.5	1314.82	3316.26	13031.4	54265.7	8071.37	11216.2
Deinococcus	186336489	26551600	25313000	13030600	19828400	3303331410	469300895	124174002	1282233440	63593.1	136855	3865780	18835300	425949	785058	162830	288983	73603.6	198147	886866	769163	1080350	886707	1195710	254993	1497450	139455	727048	119696	346753	322965	1019250	134043	372910
Malikia	186272600	211226010	3392250	73508757	220403228	454959900	70393400	10077870	118821040	30570	146005	1183960	342406	131215	125919	50435.2	2777.06	4607.38	6056.64	162627	77801	14742	46347.6	26164.1	126105	195450	1433890	423911	773291	43454.8	37894.2	261547	17074	38577.8
UBA3824	186002210	5046800	10084474	3518550	2966980	267890120	49870559	32504536	199105230	2629.18	14087.9	1753750	408822	125943	365563	141683	138894	151075	107567	401895	604894	154718	263947	323408	45799.3	502436	209355	123693	8624.81	238074	179064	492315	74009.4	344772
UBA10428	185981981	6598410	27236540	3965400	2524710	410533100	34072950	51783455	245751810	574.565	13267.2	1716200	483308	90992.4	202935	64977.8	112925	111314	35723.4	141632	316014	107072	177236	145113	23146.8	267788	130640	110330	7975.13	125601	67462.9	232506	46509.3	111925
Oceanobacillus	184995950	14958925	44232376	10551547	4683380	286807750	148315028	192516960	1079868700	8231.8	80373.5	6622620	1698950	115084	580422	355746	373879	100716	176462	912202	672876	1019000	1073680	1092220	84882.3	674734	359629	160869	7969.71	440734	310887	1070856	128780	476364
Aestuariimicrobium	184975700	4133144	11980630	10312940	7616519	839681000	88189100	104421600	133838900	4580.97	14181.2	1121320	367262	19943.6	76759.3	10846.4	12258.4	1897.16	14230.8	113063	52834.3	90468.3	88225.9	136116	15629.3	82743.8	23130.7	40908.8	2388.84	20820.9	28285.5	143452	14762.9	24154.2
JAFGNN01	184889100	5634288	295122	233859	1063640	17940100	12184340	678913	/	337.573	2254.2	122445	16430.1	13251.3	22844.6	3821.05	2661.01	1859.58	8365.61	15502.3	51404.3	11431	12825.4	34983.9	7654.89	7897.63	51441	36253.3	3530.24	16869.4	9822.49	22251.6	8020.68	18539.7
CAG_194	184831360	7073340	23870600	8053535	6711788	94529720	72253530	242998740	130706480	4917.48	23161.8	3394040	777743	24824.7	155697	35944.1	58492.7	35403.5	31958.1	239209	110982	184966	173997	215189	23984.6	163589	43413.9	52881.8	23998.3	85587.9	69347.7	273384	24418.6	72982.5
Enterococcus_G	183885600	1135974	5620160	5368095	14172924	34004040	688164	111985600	162956220	/	10981	2208410	116536	2339.98	51855.9	4705.67	1327.79	1849.79	7976.52	46946.6	45005.5	22067.3	79876.4	82795.4	9221.11	78093.5	10728.6	32839.5	657.574	28134.4	24858.8	75019	18037.5	37251.6
38_11	183426855	1527507	42080400	3019601	4635011	25961900	20747600	268742000	89771300	/	10772	3286790	145870	21622	60883.8	20867.5	32666.3	1268.06	8789.17	90839.7	82340.1	133715	68826	84779.6	11694.4	31972.8	15334.7	47305.3	1081.93	34715.9	19630.3	101200	19728.9	36095
CAIXSE01	183390990	28142856	4156502	4418871	16938700	769860900	186408220	18511320	107136750	2986.21	23341	424607	244222	29126.4	98126.2	34873.5	4463.77	11226.4	36465.3	503572	66747.8	111698	98550.8	85580.7	95926.1	142591	141838	291777	58478.6	25002.5	48415.9	241890	28623.1	66771.9
Phaeospirillum	183232980	24617806	5101540	4533691	4308540	850624020	147993920	10183651	142217390	8762.24	32667.7	1445250	518268	348940	287337	155489	67393.6	108144	92168.8	627633	420301	150053	204217	254037	220104	448588	325150	1030370	31820.1	367809	224150	710360	109334	414598
Marseille_P3106	182257390	5082672	5676133	3991670	3491460	207654200	56613250	60072790	121081980	690.822	20454.6	1395550	232790	16951.5	73103	51465.6	19835.2	19888.7	17025.9	137366	160835	247534	98907.5	159126	21066.6	118462	33929	83192.2	7498.58	45819.3	58955.5	202711	27053	52165.3
Ventrenecus	182139870	10705991	35740868	6244476	2286919	30817400	58442920	108884290	548062150	1413.9	36384.6	4802186	582203	123356	287248	83772.7	50453	45779.2	12520.3	732148	395064	521658	637554	637249	80095.5	242090	72172	76908.3	2887.3	394741	355922	484938	98998.7	356606
Catonella	182067110	4171730	16471404	4477160	4703745	269116800	26038722	77097480	169628390	4223.51	11061.6	1288100	144349	31167.1	139183	38497.8	22282.1	21482.6	18549.3	270369	186080	170024	156623	218820	11979.6	129460	14710.4	37220.1	2582.94	76313.2	61111.3	235279	22490.2	40147.8
CTSOIL_112	181615050	10556500	24350620	40529200	382826720	911258000	22755440	259590300	32809700	19613.4	67428.5	26427606	75324.8	201523	37389.5	37181.6	784.154	27033.8	20604.1	66721.6	17248.4	6365.91	58521.8	66421.2	39324.1	78635.1	35714.7	263373	73622.5	28882.7	10814	118471	20526.1	35299.9
Duodenibacillus	181507040	8430450	12232305	8448420	16267100	745871100	88018400	13774905	88256923	9284.35	21891.2	7815150	340963	108328	248664	74633.1	27012	121474	137702	394968	233608	66245.5	138437	232501	69541.4	436407	141969	163436	29826.3	129594	126069	545147	78682.5	165703
Bacteroides_H	181435890	2184620	8298339	2662036	3577502	168903100	6322866	56409990	88786410	907.04	5266.78	1206000	85830.3	35788.1	99044.8	80793.8	30001.8	27734	48204.1	78689.4	125534	56700.1	86953.7	89343.8	19656.2	92648.5	40161.7	70499.8	3970.43	56775.6	53259.8	142802	27898	56088.2
Plasticicumulans	181389300	10053460	11601790	36373450	8140400	471374000	31437800	22058090	1235822500	14385.1	16260.3	9136221	883321	53014.5	57522.3	9961.67	8239.53	10257.9	16433.2	60474.4	64106.1	8836.16	25704.8	38410.1	4788.34	75964	14004.1	239422	2256.49	32551.4	27751.4	51547.7	18000.1	21204.2
Slackia_A	181359770	3701484	15144795	2828240	6895372	/	64713173	89868037	171297350	51721.8	35814.9	3521500	231235	25527.7	22367.7	13868	28055	4839.12	16694.6	66376.7	86728.8	89520.1	106425	169590	11044.7	73418.3	39373.1	93708.6	7426.87	18040	47143.6	113572	10715.8	40970.4
JAAZDF01	181344000	727461	5965460	2512970	2315070	34552900	7384840	31512300	75882700	/	15745.8	1633870	70461.5	8226.05	54411.5	17305.6	46995.9	19833.5	10140.6	34393.1	26592.3	66456.3	56572.7	58755.9	3073.16	41245.5	10465.1	5123.45	614.628	15821.2	9933.29	58694.1	2692.69	41603.1
JAAYPV01	181151900	1952439	62486601	3261460	7832400	29909200	18310230	48999500	94795400	1269.31	11991.7	1594695	246789	28802.8	11577.9	42198.5	22869.2	5978.19	2099.66	267662	82472	30452.5	96274.8	156249	8876.85	110377	15668.2	34354.2	2677.7	39928.1	28240	172324	11645.5	44911
Acidovorax_A	180788450	12857328	2905286	4567327	12579054	1505429800	132005320	11241702	212544840	95161.7	20260.4	1769820	751219	286373	202243	103948	34652.4	45085.5	104677	199608	325838	81075	143309	287999	90233	365348	279900	1288690	169211	106465	97714.7	236679	57156.3	112565
AWTP1_35	180583400	34569146	6808445	86919250	19382020	96957168400	240786700	109942070	50785309300	298384	48815	5744251	40649500	1667880	159733	28454.3	35008.8	81369	19952.2	358010	63870.6	55997	75562.1	80900.8	432371	10815000	97251.8	542951	72075.3	30689.2	11589	70353.1	97823.2	34853.3
Haemophilus_D	180524610	2677610	11371979	5518840	10612200	203972980	25614612	118642568	91889648	2020.62	24646.1	5437680	251878	127313	336952	110512	57192.4	173461	92352.8	406488	350803	83196.4	194540	208157	26361.3	231795	60630.7	63319.6	13379	124910	95289.8	368808	95210.9	183308
Herbaspirillum	179121700	32596772	7881390	6975960	10675400	2603776450	368923953	25205835	464173790	46074.6	40028.6	2126450	1091870	2071740	656265	408303	150659	182738	452955	714762	1265730	272065	512043	1303420	181272	706943	409859	1770350	298228	537349	268742	760714	166816	495439
JAAYIB01	178706000	383794	3205500	3411540	1470790	/	1829100	31451800	2748590	/	4020.14	2054930	44724.5	3902.89	7311.4	7642.96	13289.7	/	2552.55	/	21266.1	10120.4	11822.6	20765.8	1187.31	24134.1	476.381	8992.87	1269.8	810.679	10364.8	8389.37	3041.41	3841.95
Marvinbryantia	178420000	5120678	19678939	5836941	10838241	167577300	33913365	119872260	103565220	/	26748.1	6865015	233292	25626.4	71838.9	42192	22218.3	23540.6	12924.8	119166	88417.3	171675	187947	165525	15259.1	112108	28115.4	57239.6	6039.3	75781.9	48997.7	177285	25174.5	95003.2
SFEL01	178158230	1778920	15771980	5517520	9409190	45481600	24738290	197199260	27998300	/	18949.5	3876730	94100.3	14910.4	24391.2	12681.2	/	5275.17	2448.08	48358.3	75959.8	65639.1	47351.2	66842	8071.49	48226.2	18196.1	23907.4	8290.55	27270.6	22944.4	150601	15222.6	14162.4
Nonomuraea	177686270	78772950	18934300	11952940	6492890	7488767200	1560764200	99727827	1733300100	17190.1	197878	2163690	4458310	281661	897195	243955	232920	84271.8	178832	1479150	1202200	989688	1019220	1655940	224744	1251000	198682	632022	31642.7	467485	454743	1179150	232809	505386
RGIG5612	177586390	4798370	12829901	4407521	4017670	85220000	18961501	68089650	212208670	762.424	22047.2	2347410	297597	37296.1	157299	132390	52220.6	18305.2	44942.8	518965	152615	258725	228913	219722	27085.3	93811.2	28401.3	74634.3	3308.92	74639.6	105463	281533	30460.2	88673.4
WQXQ01	177468190	3850810	8650570	3225720	1763460	274272470	57060760	21382300	224598955	1994.33	28268	2764170	269390	107359	376805	130029	86467.2	86498.3	140521	417926	510210	170772	398062	333243	33642.7	345659	168638	153006	6203.25	345371	261937	766017	86609	300497
Prosthecobacter	177335820	11184537	5361700	7342960	8509360	64073790000	1286357400	14857600	7871475600	188748	41223	3029750	7695739	1320560	879389	260624	189390	215217	213727	994204	1039510	147668	526095	610437	1663060	876450	492517	2333960	111723	471130	314130	913190	154091	443161
Terrisporobacter	177257600	11206363	43081230	9170533	7284020	167508300	163067980	409238900	1168576200	2636.07	47318.9	6201605	1351870	67686.3	344891	180705	110098	31856	49883.5	437532	258284	649347	524535	367355	36387.1	311879	80926.5	110094	3186.25	208131	140758	432185	79470.6	215544
Eubacterium_J	177245310	6301408	18871301	5181898	5316520	157398160	66067761	98007540	337227800	1612.23	25612.7	1853560	660169	41754.1	193154	74980.4	68077.3	34010.7	56031	280065	238924	336150	323049	394548	34151.5	190561	37828.3	61938	4122.01	105524	84238.1	302966	41473.2	135486
Lachnoanaerobaculum	177206140	6306462	35351510	5654948	3792740	232542800	32941147	109683250	284284410	3265.32	21046.8	4440116	249261	43473.7	114442	75796.5	103960	28577.7	61514.5	269368	217561	357513	316232	336081	33368.5	132886	31572.4	49704.3	3729.31	89775.6	92638.3	298273	41539.9	106739
Pulveribacter	176936250	7436030	781699	2891540	7259470	202893100	22506093	6569460	105547600	1622.21	6009.96	586401	265140	43518.5	44662.8	16532.8	1195.85	8749.37	15409.7	32846.5	121491	12835.8	34727	36659.6	16827	184327	23946.1	76966	9109.11	14730.2	10153.1	36470.3	6825.19	14519.8
FLUQ01	176801000	1734070	6364140	1998810	2707550	22476700	866475	17691200	5110890	/	3027.75	343709	23139.5	7012.9	1550.75	3005.15	3161.99	13622.6	/	6719.15	2705	5775.15	11948.1	22740.1	11550.7	14368.4	25841.7	42734.6	1835.16	11819	6671.27	26974.7	1623.62	9517.61
Desulfolutivibrio	176531995	1648230	11489143	4367910	2801570	56866200	9074549	15636640	15535130	388.886	1939.49	1224814	55294.3	21944.2	38886.6	4653.19	9743.85	2232.89	7248.78	5739.43	33110.3	4296.55	30902.9	10911.9	1241.44	45334.1	6973.02	52275.5	1865.1	16597.5	11094.1	22606.7	4944.56	33673.2
UBA6170	175907740	2268924	4987450	1325320	2346400	558782610	19525265	9194512	527853880	762.272	7269.12	607165	112672	54012.2	112492	45464.7	19023.5	35469.5	51783.2	311603	124859	56461.7	115143	102316	10373.1	273240	128826	38723.8	4850.37	114268	71444.7	179923	36643.5	145064
RUG14515	175603010	11887164	32777031	103236530	2146533	337398700	82286970	585526500	889824300	2273.33	45881.4	5721140	1410410	84833.8	495323	492072	187828	67854.6	167241	733147	885993	1016820	714295	1790110	45651.7	287805	43143.9	79805.5	1567.42	248852	145102	498039	66021.6	246655
JAFGUR01	175594100	2791350	126310070	48142098	98078334	36808000	8628850	96537780	99964100	2495.28	40931.3	30027300	58593	86968.4	94099.9	31451.7	36818.8	43822.8	12839.9	53441.1	154621	62454.9	80473.5	81032.8	11372.6	111870	71069.8	105483	4370.12	26528.9	39386.7	77426.9	22122	53705.9
Nitrosopumilus	175462606	82057100	55351300	12889300	9288280	325845800	1120000590	215303796	2497874900	9236.72	215808	11511000	1746510	409548	11270200	7583900	833504	585521	16444500	33793600	2513540	2749780	2705390	131531000	243982	2004520	1545670	443541	18591.8	2001940	6637350	7173840	15259500	1906680
Pseudomonas_C	175353130	2846840	38397573	19248182	3471670	201528710	21679518	81830060	140896083	1853.48	31492.6	21328759	130134	104287	351211	121303	77698.7	114707	448496	188460	220797	76088.5	180438	280319	25861.4	410525	111317	70251.6	13854.8	109056	132343	368797	157361	229657
Macromonas	174989000	4154060	2777850	30274700	104810000	127222000	19872300	4533720	37122100	9983.67	5298.11	400287	107018	66634.7	25631	16136.3	3940.83	4473.27	25174.2	40143.3	82622.3	9394.61	20880.3	9517.28	24017.8	73167.5	1566280	227191	25664.6	16167.7	17935.2	51513.1	13830.5	15872.2
UBA1267	174792119	4876550	6401450	3242431	4094710	210186470	53414205	53297402	380449130	/	20774.1	1513370	527608	33132	147931	45043.8	45280.1	23454.8	42705.4	464699	130725	229277	188077	226368	22896.6	188204	34276.6	85325.7	399.833	110297	109942	256396	40715.3	146611
JAGNLA01	174647000	2090400	661713	717818	2036060	14110200	3911430	3209490	9995760	/	4344.19	229041	4770.97	2096.19	26069.9	2135.57	1348.47	1247.6	/	/	15305.2	10115	10100.7	35970	3978.77	18671.5	14906.1	57620.5	2591.71	9599.82	5200.62	33800.3	3059.7	19936.2
Ochrobactrum	174333336	1585640	3276490	2187610	3761190	275667430	29725202	15415131	35008506	4943.06	6138.57	991321	123108	65551.9	127756	77675.9	24833.4	64374.7	55594.3	120040	133294	54059.8	67497.6	85678.9	10395	195599	45893.1	71927.5	5488.81	87536.3	65965.7	211685	28754.1	95075.9
Aquimarina	174323220	9739664	25818796	9235981	5716530	845164820	144153680	90710260	1123918330	5471.13	56101.5	7566880	1401950	407331	2655780	1203210	800572	1117200	740107	1537550	2442510	760190	1408550	1591600	166751	2309690	1202970	347601	51561.9	1144710	871916	1609610	318297	1096640
Emergencia	173876360	5407895	14917734	3587328	6459100	104574300	27264273	65547310	278525700	2759.69	13835.2	2104040	396588	14149.7	121119	54284.6	74030.4	14555.4	17617.5	241055	114695	114203	139682	145831	26315.9	89505.4	25269.5	65170	2434.72	60412.7	57054.5	246376	20543.6	63995.3
UBA6987	173617575	8142770	20668100	6967130	2547730	331660420	73322651	59119424	265599150	2927.59	21674.4	1061390	843138	31792.5	208100	16498.2	34247.2	22386	53844.5	178483	277636	163586	381486	219041	25323.9	321220	58181.1	117446	2051.11	139035	116087	458829	40490.6	124439
CAG_964	173196980	4490278	28000970	5148721	4051519	/	41959450	94682940	463868710	3005.22	20791.2	2442000	409518	32341.2	91050.7	63231	56561	10723.9	19066.4	239095	219479	201376	247141	209627	21727	261698	76581.6	32243	1020.62	102273	61461.9	231265	33413.1	121464
UMGS995	172715400	11181149	50729870	7316248	6620491	75115500	76187010	128614480	563030280	480.479	27318.4	6146002	641432	60339	375949	99508.5	93107.3	37506.2	37045.8	628674	446956	827746	531372	373763	47505.8	444564	77987.8	77067.2	4519.62	140480	121972	515430	74397.5	218797
CAG_510	172555470	5171651	22515504	5110303	6116490	277439100	69797203	113163270	161474660	/	19827.5	3697290	357653	32629.2	82249.4	61479.3	77215.6	19043.8	37822	223189	120098	170357	276039	257616	26330.2	119909	38081.7	54761.4	3128.97	87981.9	86156.4	229463	34404.6	135646
SFWF01	172285840	4579839	23773223	5105800	2156170	221174700	32320097	94831930	239327030	/	23023.7	3089531	407550	34885.7	114850	57425.5	112626	33611.7	25789.6	294836	135800	171667	306936	327576	19538.8	273899	41688.3	28516.9	6247.9	165955	57842	299192	27920.1	195246
CAIVAT01	172170810	11341806	9184562	2794840	6296943	516992650	68457693	17688224	187084940	1475.35	15515.1	918674	579027	88500.8	216323	116173	28778.3	78648.4	95556.8	355034	394689	101906	169606	129890	39544.3	249644	171507	264471	11851.6	198496	114099	302378	50051.2	144817
Pseudobutyricicoccus	172131100	2180003	8021977	2724958	8628184	20646800	39141197	34247540	59509390	/	16787.8	3587330	105361	9426.55	51924	14227.3	15936.2	4639.72	15898.3	44879.1	61443.2	71227.6	61395.5	262194	10041.4	57231.4	14888.4	50412.7	7274.3	27315.4	26652.6	92125.9	19944.6	59187.6
WRMH01	171620110	7480578	23774468	5167870	4111870	374811080	52831563	124720370	364787790	3222.96	34191.2	2941680	570016	57939.7	268736	93997.6	155398	45502.4	98026.2	757431	322199	266013	440889	383596	47562.7	309781	67907.5	181946	2927.02	212221	147027	460737	53221.5	333217
UBA1227	171468490	7027959	20362122	5890540	5063973	116839300	26090955	70550040	321615690	/	16780.9	1723641	555560	70273.7	227861	40547.9	95984	10518.6	44191.3	348978	372578	355571	296870	365382	29511.6	207370	46779.3	62699.4	4225.61	169857	91440.3	373430	49583.6	190807
MWEV01	171146000	1330760	704105	2630000	2980830	/	5433930	9243290	8878980	/	761.137	111335	23471.2	2808.17	11004.9	5348.42	2674.72	11337.6	1383.96	90340.5	17615.5	6497.16	23650.4	61603.5	1304.46	238503	3452.28	29851.4	3937.04	17123.4	13902.1	34346	5827.78	15375.6
Caccousia	170900300	2294800	4756370	1978030	2045424	6000490	18195050	33987250	103956500	2490.86	6695.69	775593	169170	11252.3	45188.6	14516.3	9229.4	5844.74	8272.22	53427.1	85154.1	88251.3	37882.5	77555.3	2139.23	59261.3	8241.14	36792.9	1879.29	14592.5	21273.4	30690.7	13809.5	12883.9
CAG_238	170855140	5141221	27633030	3825440	5754013	12191300	52024050	98057964	148815940	/	16486.3	3890047	232544	15747.3	111297	38008	19001.8	16584	23535.9	245515	75828.3	158591	167336	188621	8722.39	297511	61930.9	50566.9	4669.2	109773	70210.7	266347	21361.3	118758
Granulicatella	170820620	5262307	20760851	5365960	7917072	293668000	75072735	117476690	781126750	/	31994.9	2795444	196938	58555.1	140010	48382.3	16658.2	34781.5	31689.9	218325	101920	149214	308057	50906.6	35811.2	149538	53583.9	28620.1	3239.06	135496	81915	292509	36786.7	103830
UMGS1889	170245130	1375910	3915842	4497115	6372130	19727100	8719550	12487700	11009410	/	7495.64	110557	51910.8	24625.4	40776.6	31831.2	21494.1	3159.47	14165	64949.5	47029.8	65264.8	82098.1	83345.6	6459.8	29104.4	4592.34	15633.6	2280.26	23518.8	15439.3	73227.2	1480.47	43294
Pseudomonas_L	170223000	5913840	357798000	378298000	4257270	456037000	66994100	2292950000	148480000	114662	663907	714958000	462010	42741.4	123097	249843	29594.1	105927	175729	146748	65518.2	45203.4	23759.9	110655	8783.94	1597780	95421.5	28755.1	3660.56	36700.2	17584.2	67924.8	43048.8	82649.6
Hathewaya	170058619	7725570	32121280	4815032	4562851	27996400	38449090	135765200	522084800	1411.38	29571.5	5552261	474526	29479.8	117961	33575.5	111074	65312.8	41022.3	250136	139379	345218	243730	350158	17042.3	171127	42196.8	31649.5	2389.74	84331	94428.9	290440	26219.8	145891
Methylotenera	170008914	15381300	12691632	6213030	27606200	537585550	135752326	33068800	371489587	3793	34295.5	3225590	621542	779041	1237720	649327	173456	291322	587951	2683410	1003860	287052	535071	1236980	225635	1158710	734417	913108	183173	579868	453680	1309510	368187	833941
Clostridium_AK	169927900	4414395	14192260	2643688	2173418	182426700	51978020	87644940	219440900	1872.68	12463.9	2309423	283350	29549.4	100407	46596.4	65444.3	8312.93	17296	160388	87704.6	187186	190395	135832	13332.3	135301	29472.4	35255.6	3285.02	56148.8	62838.8	187704	25779.5	79566.7
Roseovarius	169832222	13941200	26912000	12322590	8208090	2507529180	310074180	271540965	900981081	15792.6	77895.9	13442400	1703060	319761	4994690	2266030	1037350	2171150	2707020	2235460	1965810	711506	1305220	1647110	213308	4770340	1537020	466134	75342.2	1092450	932049	3189130	935241	1720760
Sporofaciens	169698240	8453511	18242406	4723156	6449700	40708030	54633815	106621270	230873190	1577.29	25101.7	2879560	391900	33433.5	209159	73936.6	101725	39129.1	36165.8	377464	207593	368769	301785	371621	22193.9	275946	45927	73005.8	4287.87	135246	79156.2	356930	37418.3	103210
Lachnoclostridium_A	169507421	2812760	18293700	4658267	3670490	27465770	34268242	54775689	148893670	3569.36	17021.2	2260455	374354	30321.9	92237.6	27545.4	30273.3	5651.34	26036.6	284878	116955	175303	189209	186730	19481.1	352031	27970.9	61423.2	5723.8	68253.7	51681	206429	20470.4	55128.6
Methanobacterium_D	169498626	2943556	8509046	2455784	2638527	16873700	38634073	24445350	316171800	/	15298.9	1203473	745597	77291.5	131663	43631.1	64382.2	37071.5	48425.8	289015	181338	160547	196015	289170	27612.6	131871	39363.3	58100.3	6724.37	164222	74634.5	230670	35594	118868
CAG_217	169497100	8281068	107099440	15117685	41591750	7167510	28001090	1700360800	67931650	3163.8	45984.7	14339685	256400	23887.8	2342.67	2953.05	45857.4	5549.34	12379.7	50802.7	34613	14328.9	54500.8	39349.9	3130.01	90254.1	15088.7	35792.5	16673.3	25955.3	35630.1	28012.5	1840.09	9088.01
Mycoplasma	169493370	12186222	32585970	8949880	3670465	289141500	57294070	111616180	960198800	6975.23	66844.5	8700434	618789	85566	347174	432104	562971	154620	231089	553681	490236	1293760	535640	742020	67653.6	476537	139073	104619	6650.34	200637	208159	410859	75266.7	335258
Chromobacterium	169491640	22265878	4193607	5804082	10876224	1013441890	161170910	18072254	253075490	3414.3	26298.9	1352010	627171	463779	368317	100419	48233.1	63489.6	101124	193657	290369	73535.9	161418	239151	75858.5	1051850	198272	486372	61986	154692	147993	423982	60196.9	113306
CAG_45	169448967	2507261	22478290	3657876	6210540	35461900	18740780	104831500	100293300	3132.21	10456.3	3856760	274176	19771.1	52727.2	16204.4	17092.9	11544.2	11023.6	195005	50389.3	55053	85810.3	128999	13286	76437.5	7503.97	36080.6	2739.5	55698.6	24423.6	106822	9688.21	54125.7
UMGS363	169360100	2496910	12566500	2273490	6653075	12497600	19877050	43424530	51664260	/	10191.5	1185820	296233	32576	50820.8	16433.2	29161.1	6766.4	30680.5	142125	62379.8	87667.6	117714	68717.6	13697.8	118746	33829.3	42722	1829.49	50829.6	31839.2	133177	9471.41	27380.3
Avoscillospira	169285600	2852953	6944864	5128202	1320670	197319100	57421280	28921120	24179290	/	14572.7	854923	351930	33315.6	207331	70132.5	111519	43885.9	59612.5	16561	799427	580539	570759	609648	14891.7	444099	40869.8	103056	4588.7	145102	164560	430134	77911.3	201450
CAG_632	169248878	5522020	21521070	4416270	4021600	45781000	35187162	94568800	420392920	3582.1	34003.2	2741242	359389	28624.9	112728	48575.7	69774.7	14976.6	17026.2	928437	151278	203517	278822	191104	27661.6	163685	19250.6	31476.6	3302.41	148984	104600	312495	33252.7	181528
UBA5436	168714770	4684789	24569200	7574659	3253163	151674100	24785290	120637860	500864300	1175.98	18876.1	3384527	598652	57929.1	165249	67248.8	94461.8	28095.9	30605.5	398607	305321	388066	716361	451464	36294.9	175431	43869.7	54300.3	2670.8	116116	104410	372156	47103.3	173873
CAILNX01	168695000	1226030	6138280	1756750	2587170	34734000	5725350	8506000	3721710	642.489	2262.85	656285	17068.8	3285.26	6084.95	5025.29	2128.31	4130.36	6706.85	958.736	5259.31	7207.22	27772.7	17353.3	2174.66	34131.4	7735.05	153746	3472.47	6261.7	4352	35551.2	2540.38	7145.23
Eubacterium_B	168429090	8193690	18424801	7485388	2480890	244845400	40316510	71823150	357436650	/	36893.3	1549270	397779	58769.1	221099	53140.2	111640	55694.4	51611.4	339115	386548	454632	320872	401404	14956.7	309345	60307.3	88603.7	5335.82	249286	107262	454333	53781.9	219214
UMGS1491	168420060	7875060	53704907	4469526	4655900	205535600	46246063	173897190	535370100	2474.61	28092.6	4108395	1042720	87847.8	409330	215077	223554	91267.1	99649.7	615529	232761	800342	418120	291851	46321.1	318707	56974.9	92424.8	3323.91	133612	145427	351282	71488.3	201972
Mangrovibacterium	168088700	8849247	888462020	58200209	4999030	188546990	31506938	1072573240	148925040	11358.5	57820.2	54069908	190098	52405.7	86864.5	41287	29231.9	50484	34877	69536.3	97938.5	35189.8	60775.6	83439.6	9486.31	288479	53668.2	96137.4	5398.75	47778.8	41845	107826	27807.8	45411.7
MAG_121220_bin8	167557770	9139857	22603844	7583667	6892334	631523640	87486767	64481040	1106949000	13962	48155.2	6217270	889639	349478	18348500	2482520	6872470	7032760	7479830	2882950	17539400	2655630	28164500	51599500	166920	2080030	9249410	278716	72659.6	8479700	12431200	6197960	3307270	17797514
HIMB59	167318067	9047560	23425600	9625100	8034070	246408500	170094151	68765420	998660463	23670.7	96231.7	8075830	1150130	500586	81662600	20545900	43313800	72786800	22284600	100493000	73163100	24684000	45929100	47224000	317000	16948000	70730500	518991	58965.3	31976100	38116000	51968500	13839700	72051900
Chlorobium	167062754	9579190	29583100	6253500	3570440	951223030	143579370	43695800	576189486	5598.57	45535.8	3964830	787926	280221	708814	344778	238403	202570	228270	699217	939113	282700	638007	508108	79371.9	2482020	310061	522714	21406.1	786373	516673	1522880	200165	625671
Anaerospora	166643700	3676709	2848485	1983509	2376190	34132200	4208032	10166540	31107020	/	3559.97	609608	59717.2	12404.6	14900.4	416.214	8130.88	2738.07	1561.16	26968	22117.7	40053.6	31913.8	90039.2	6215.66	42174.4	3873.58	133320	2352.41	19488	10078.8	47208.4	3239.47	15354.9
IGN3	166410680	22684940	8689255	2816900	5624730	92385900	194994290	20899216	285346000	763.958	15747.1	2206750	361414	85852.9	246196	87422.2	58071.3	65844.9	59399.7	458405	285411	112759	231157	276338	26430.9	401099	110923	98531.4	5940.05	143577	119284	382134	53245.2	145319
Sphaerochaeta	166261926	3566390	187048750	7845798	2291460	164486310	37505479	249348027	106247030	3765.63	16790.7	3456560	155659	96845.1	154399	127817	29505	42977.2	110915	231485	233292	84374.9	216852	200801	21935.6	425933	96491.1	47409.9	6263.55	171845	139075	612418	64374	175923
Pararheinheimera	165992006	18435456	22201086	41158343	118012210	654393150	44901021	76083030	138991915	6410.18	19535.5	6995295	725709	1118030	580473	268743	109792	114476	721529	298645	426116	262988	196974	380656	1173990	2868120	776994	4306530	1420910	206500	137444	552386	155711	350392
Melaminivora	165524000	5180600	2020440	3239150	10555400	177446000	13250900	8782200	46299500	106040	2515.88	1231220	260366	36613.9	25231.6	11916.3	8213.97	2905.61	/	12955	15742.9	1709.6	20181	20890.7	8112.61	75872.4	38065.6	41379.2	13219.5	2891.84	6293.18	15773.2	4145.07	9590.55
CAIKZJ01	165197400	1779670	935338	899768	2113020	203284500	12198130	2300730	48380440	1032.44	2919.22	357832	548308	16012	61652.8	33795.6	10776.5	88372.4	24395.4	65187.5	86902.4	53645.3	44306.1	73723.8	11763.1	57752.9	110157	64510.4	3640.42	47536.1	31595.6	98742.2	13543.1	28888.8
Butyricicoccus_A	165066580	2290092	13639544	3967410	7128861	98603700	9572110	84144270	68753920	2502.82	14127.4	2834350	153535	27317	48210.7	19715.1	16487.3	3074.87	12491.3	194995	76689.1	39401.1	123117	195853	18130.3	87613.2	9334.31	56427.8	4049.39	25127.4	38156.5	96923.8	13122.7	46637.7
Thauera_A	164568750	15700597	200672283	9210938	7775855	659758300	48071985	32143570	462272700	21950.2	18442.7	5170313	1244430	103628	156739	43578.1	23437.7	37251.8	8324.4	211773	93333	11014	57158.5	71066.6	24774.7	212734	91192.8	228157	9783.28	33842.8	47827.7	158077	29318.9	47748.4
Treponema_F	164529190	1657520	4337270	2160570	906586	46562800	22044268	19331099	144119305	474.127	9248.9	832467	111958	33179.8	117782	15591	70835.2	134183	31744.3	157388	582479	92764	196943	148390	19715.7	108817	81435.9	57748.7	892.973	103253	159490	372804	38424.1	108258
Clostridium_AI	164509360	3783674	26607577	2736559	2983211	57613500	9112060	92918000	85115600	153.141	10079.9	1411413	195602	20207.3	88137.2	44272.2	34990.5	7429.81	35406.1	132656	68959.4	134558	112458	257400	10089.5	81453.7	60452.9	32973.6	1371.65	53561.3	46943.5	156583	20015.5	66999.8
UMGS1279	164443779	5182510	31500585	4440750	2568070	111835800	43485195	97972590	529374840	/	20584.6	2406849	625732	54126.1	260261	166978	92560.4	58893.7	80999.7	466251	262193	412743	238335	604486	49905.2	401301	99041.6	70524.4	5054.94	153816	93738.4	273962	43160.8	144994
Pseudoruminococcus_A	164257770	4089391	16927260	2627610	15542000	24152800	26393300	176873300	90376800	1854.47	17809.9	1976097	155332	11714.5	11491.6	10798.6	15588.6	9385.11	6140.78	65306.8	47543.1	57333.3	66267.1	45947.6	3398.62	160948	8464.32	12564.2	1121.98	36377.8	27800.9	66530.6	13945.1	25942.5
Tractidigestivibacter	163845135	3912627	10250941	7311800	12102900	146056770	51734568	97694640	100670430	4248.82	38998.7	4396910	219340	28242.7	70579	24697.5	24130.9	3561.83	10696	79569.5	89264.9	161696	87120.1	174895	9155.68	115523	6287.59	23648.3	4926.06	38426.2	90438.2	165951	24406.5	66531.4
RGIG1962	163793000	515454	846338	2435430	2824710	49214400	10514500	17922100	22794300	/	3388.86	774754	7987.15	5420.22	2666.72	15689.8	/	/	3705.55	/	1323.96	/	/	/	2594.81	5622.21	3562.05	105306	1299.61	2978.99	3200.89	8443.74	299.875	12458.6
UBA5266	163764530	4368500	11175100	2743440	6116743	299416900	22366309	27113241	220875040	/	9419.51	1409052	387601	113502	204102	83111	26864	28987.9	98298.4	209000	194055	59854.7	135044	139081	24546.2	294703	119930	122434	2156.5	85091.9	118937	242399	57757.1	105132
Pectobacterium	163706200	3951786	12727336	9808590	16826135	242574040	29131031	27406604	86839165	2766.43	16683	5479350	190130	85266.9	214826	101285	38318.8	60215.4	123898	223179	139101	63214.8	100137	207373	33000	271031	145228	344648	26166.5	122031	126975	362592	54167.7	100858
Providencia	163685250	5808774	72471600	19667350	8922970	214570850	60921608	195548016	416509400	1953.78	33157.7	23403557	331856	148005	582990	366775	173121	183132	402789	334054	355174	153396	301565	422886	58121.7	480095	270295	240040	19306.5	244664	235464	604328	133871	318760
Gastranaerophilus	163330500	908543	1055881	468806	1197706	131632280	5908140	7400564	60826000	730.807	1663.44	325537	28346.1	14603.9	49137.1	34661.5	1926.67	15034.9	9270.98	82330.5	23243.1	21253.8	31466.1	27596	8563.78	125444	37358.7	53990.6	2447.49	30914.6	11189.1	75699.4	1364.92	17438.2
RGIG1668	163236330	3067478	31117270	2992150	2697280	16329500	18628894	91974610	207782600	/	14577.3	2173179	391957	28652.8	87037.4	97779.1	61018.8	24665.1	80636.4	137657	91610.8	201325	97021.3	352895	14492.3	75335.7	104921	17617.5	838.781	47648.5	43240.4	102080	22419.7	49454.5
UBA1784	163038800	4775420	8449500	11268500	2752310	556326140	75184827	24290172	191635619	5206.27	16532.1	1959300	429596	114460	332170	123895	83259.7	54847.7	51535	349604	414248	139664	300029	302652	37325.5	412304	156267	344307	5321.06	389242	235767	687530	91723	328094
OLB8	162969120	4350540	4145405	36928789	1350284	3505739900	42332020	29487511	68248185200	4957.89	19959.3	4735854	5201560	226150	45226.6	33905.5	23652.5	41031.3	24945.5	38818.2	150914	36073.6	66789	50005.2	28551.1	822548	51579.8	35959.2	5554.15	66624.4	37757.6	142164	11043.6	35404.7
Bartonella	162871956	8620020	16617400	4843070	3870010	632826270	94033312	50017900	660139041	1350.14	57195.7	4832000	649582	279132	999604	482614	547355	596342	415977	1294780	1315540	528430	1041730	984875	121613	931883	753636	345282	31041.5	919631	551154	1685660	280970	763076
CAIXLI01	162813410	2688767	1678908	3050958	3294733	139804000	20323590	6293330	41275770	/	6651.83	295634	152153	19970.2	42040.7	1974.99	8519.94	18744.7	41827.5	58963.2	44544.8	9636.66	22830.7	45363	23358.2	42986	54958.4	133502	5586.49	37244.4	22252.1	69947.3	6972.8	86083.7
QZKY01	162732660	9180400	3023121	3433708	5678834	498713300	57772780	6829752	96244600	642.085	7803.55	414172	179788	285449	168546	29743.6	17191.3	59054.1	27698.7	71835.7	70927.9	34105.8	30086	44524	22863.9	126948	42961.6	207384	25372.3	30416.4	44500.6	139973	17524.1	46962.1
SAAU01	162606000	23734100	33204100	13390800	11137400	65354400	14752200	81490100	32118300	892.05	16950.9	13964900	40711.8	13557.5	10801.1	7317.83	3583.11	6809.45	6925.57	28960	17332	/	20317.4	27310	1842.51	59846.8	45565.7	134694	1922.41	10930.3	7381.44	37746.4	3852.09	15881.2
Aestuariivirga	162579734	14623553	4388310	4723040	22129400	13383366500	255454210	50601663	1150843280	72547.4	27466.4	1413840	932248	959463	441667	80530.9	63479.2	128064	103937	776721	313692	100962	165389	173379	1900970	1739570	1276790	3121640	790049	217167	101504	280824	55633.1	173004
Coprococcus_A	162469730	2886486	38910361	8017072	22412858	43105000	28018060	343131860	133544400	1609.26	60302.9	27338542	232826	18390.4	62391.5	14459.8	23832.6	10043.4	27097.6	139189	117753	126314	126024	36558.7	11238	106276	30619.1	30138	8738.55	32883	30815.4	109569	17323.7	48448.1
ELB16_189	162097571	47054300	13956029	10351500	8716660	32126381270	1568710370	55699759	6005476100	51432.2	69563.7	4386420	3593750	1800420	861065	397194	295815	328286	293599	1156110	1238820	404102	796821	766764	857941	2225840	607468	3090040	233060	757059	518902	1310470	229740	640582
UMGS902	162068530	4160460	9886981	3359120	1764050	649150400	44720735	46692680	250930630	536.438	25186.4	1245560	191565	24787.4	69695.4	32783.9	8359.55	13642	46815.3	240912	132842	248916	219830	175366	14680.2	151026	45777	66564.2	3241.45	145254	89877.9	266281	39568.2	156809
CAIKOD01	161968300	2028003	498425	839612	1084583	64654900	5429333	1967501	2674310	/	2324.49	122805	51173.2	1318.77	/	5316.42	3253.14	/	/	15652	17101.4	6463.3	11457.8	5801.59	6381.09	17784.6	4788.49	13820.2	1776.9	14796.7	12445.3	29443.1	1029.97	3570.93
Lachnotalea	161943138	3618862	45027954	2482519	4933890	3991970	24215000	115321400	130746490	878.746	10773.9	1749948	205854	23877.9	146518	34867	41490.1	11019	22380.3	240005	106065	127756	133863	160461	23543.3	126372	43810.7	143795	3353.84	43556	39564.7	140744	18376.9	42885.1
Phytoplasma	161803334	25268733	72051204	10874600	6082160	500946000	212544460	265663360	3070881300	/	123854	10762400	2366640	129818	1247050	1173690	4810870	842298	586044	1717390	997145	5751610	1690280	3269760	179468	982245	508831	131099	30341	495414	467977	1133690	212401	792558
RUG11788	161766110	10641866	31306202	5727858	2660285	68022600	78944280	119817200	1003579000	/	33187.8	5968680	1158151	48117.4	392569	110419	230482	49920.6	50692.3	543177	172101	538407	349255	550966	30079.7	131389	131057	78555.5	1390.6	148859	107070	436866	44463.3	235985
Aquabacterium_A	161460680	40904833	6115620	6437540	15214400	10800194000	286571110	13790136	2293889700	217544	31032.3	2055930	3437160	1563581	583887	247557	67834.5	163899	158053	714809	442952	119045	174097	480994	899100	838285	1186111	2776630	599434	233179	186611	533757	110265	168842
XYD1_FULL_39_28	161310772	10610600	13906782	3925130	2600060	197198800	49814190	34645153	671320010	4144.52	48907.8	3473260	576903	357681	171164	50483.7	117265	27759.5	152932	441337	479034	216624	369867	270267	280876	687088	1714670	834888	72153.9	192623	202163	461773	66831.4	239944
UBA4096	161127480	19631178	5205140	1647882	9826444	117080180	17908700	8956505	64485493	3538.01	4864.61	726778	3500780	259112	281018	91747.5	16875.1	40898.2	76223.5	153876	241364	92412.6	103913	100717	91507.6	258515	237767	839155	18386.3	140060	55659	184841	24368.8	82048.5
Lachnoclostridium	161125210	6655193	64685880	5077189	7320543	79289760	37535648	174383680	522124000	877.258	27329.3	2939720	638768	43994.3	214701	40992.2	95318.9	21327.7	41744.6	525982	136619	242891	266163	375980	38356.4	150319	61649.1	75271.3	3636.96	93337.4	72893.9	220647	35049.6	98585.8
Pseudarthrobacter	160869779	34286700	23020400	15278000	8092430	3555581430	652477610	238636160	772173203	11675.9	96724.5	3696030	3232780	169529	690732	207494	167901	55455.2	145298	1287130	784601	950280	786382	1324960	155639	1095490	135533	383994	30012.3	344589	327029	1024060	158935	357663
Caloramator_B	160452130	3383964	13177134	2622008	1445260	75800700	38359250	41408200	183600770	/	7121.66	1590301	141181	20278.1	34841.6	33642.7	26124.8	2715.51	4694.12	45370	65429.4	148040	182462	96841.9	13213	105153	6736.55	16681.1	837.51	42704.4	60132.2	120235	19839	75979.6
Lampropedia	160316460	15612735	4688954	4902059	12475120	604455600	85149670	20833140	195319600	14201.7	12928.8	2291120	359371	250446	187806	132388	31537.4	51829.6	67431.3	307923	228692	38942	108610	179267	83156.2	333417	148399	280526	53845.4	98370	80015.1	307828	44349.8	137442
Agriterribacter	159327260	3788010	2565397	6834510	3859350	9876389400	106196423	11212000	228892230	4006.55	9939.96	858874	1294320	120106	116579	37214.7	50863.8	75372.5	70596.3	162920	182362	32855.2	107912	71451.6	35486	150103	77923.3	164859	17576	91083.1	52252.3	157962	33819.2	102365
Bellilinea	158528950	3037908	1191730	478783	1880070	472723000	98193500	3621700	201321640	1155.43	4084.07	182498	53092.6	13446.1	78348.6	28281	5757.76	6157.19	42646.8	145771	75151.3	13576.3	34761.9	71238.2	7409.23	90118.6	10169.2	26448.4	3769.11	27809.9	21923.6	90575.2	14728.6	28093.7
JAAZZIT01	158427360	5170950	10101206	2420755	5183256	18931200	13154530	36043950	139504170	/	8536.35	889293	134543	33144.1	103745	34810.1	39891.3	8820.34	32104.9	119180	401187	113221	196718	198154	5274.31	109627	21756.9	22835	458.426	75680.5	38790.2	127140	28958	100905
Erwinia	158288713	7791330	17682447	9633300	12796700	615366460	103217174	64319924	306308820	5511.43	33183.2	7680890	563334	165841	572847	308245	109909	146884	282097	692677	1224100	191099	347292	411000	64642.2	608942	153201	343231	27295.1	326133	182008	684970	117292	360854
Parvimonas	158083800	8340094	45886420	4993676	3574299	122483990	62391250	126058850	787234700	399.807	19376.5	5713461	825415	47823	345531	177019	71410.4	47681.9	86584	382375	318974	495032	436636	434943	23341.3	223586	81704.6	59966.5	361.363	141350	148451	409670	57371.6	166052
UMGS1484	157964510	4264856	14590817	3557920	2776409	46940600	26667240	73714910	218881620	10962.9	12977.2	2642636	146304	29874	30661.2	27797.8	53414.5	24904.5	20792.7	232606	225459	148520	496320	138933	17268.8	205217	10914.3	53913.9	5132.07	116041	151427	344466	33317.9	110563
GCA_002282575	157915190	572466	31273683	27205370	24219933	85270300	5201670	9468196	12853570	616.1	3133.41	1810433	17009.5	18699.4	21187.2	19881.9	29860.6	14302.3	37980	31835.7	46950.8	13174.2	27691.3	3018.21	9394.59	113199	165835	330295	14350	41186.6	10629.5	75381.7	4106.9	34996.8
Blastococcus	157643910	73554007	18123432	14392600	8126790	5774627900	1380509100	117727304	1014026300	30341.7	138413	3219130	3825720	180627	1112730	184637	260760	97251.6	103998	936401	774232	674849	707988	1054010	254818	963430	175125	654356	66809.4	274693	357590	810061	167153	426818
AM51_8	157499199	3803840	27979762	6816760	12028200	116616500	19255964	140841409	210985470	269.971	30155.4	7171430	317495	14330.2	66229.8	18431.3	38684.6	13934.1	25315.1	443092	104833	96186.6	170413	253673	29090.3	112965	28669.6	33001.7	5637.89	62711.8	58021.6	178768	17683.5	64578.9
Clostridium_AQ	157339650	3425501	12055306	3302747	9772993	83030200	14417440	115990150	132530310	1516.34	26060.4	4645210	243414	18978.1	59161.9	15594.7	49095.7	16920.6	23636	173921	99022.8	206365	152143	183234	14928.3	98007	37473.9	41645.3	3201.49	55686.1	38301.2	153497	13088.5	78124.6
Muricauda	157124729	10294400	32633046	11027200	6399810	1812957450	200337508	322239030	920240700	44403.6	158979	34279600	1993730	434743	4316390	1524390	1428950	2425240	1162860	3952110	3234110	1091480	1603070	1838790	171150	5206690	1698760	417092	57690.8	1446670	1148570	2326010	333090	1524060
UBA1234	156998650	8307804	27586500	8602467	8714660	97415600	55915360	213601450	782873240	/	27160.8	4862250	461639	112385	198059	97241.4	49331.1	55533.6	39989.6	514726	256814	436228	371778	303666	42768.1	214331	96611.8	84640.9	9145.17	159123	143519	403723	47349.7	214475
AAA536_G10	156983754	8074430	16330000	5929290	4638300	654792060	121395584	58018617	1089281420	10676.8	77085.4	6798820	811824	396934	14448900	1989260	15596000	14937900	4106460	3986090	43150000	4931690	10473500	15672300	228136	3806210	37632500	333511	31028.5	21300200	24295700	20832600	8359640	53790900
Algoriphagus	156913719	11232100	19364074	6753360	4161510	1446670840	144054514	67973018	1099536550	3556.15	58257.2	7122330	1227270	396287	1452400	721984	428434	631393	485917	2798510	1714670	542047	1032150	1383310	192612	1718640	1198570	560268	100449	879648	637303	1738570	232963	787685
Parvibaculum	156852790	5193543	57536102	15016831	6628580	556422360	118613520	26324550	202954690	143552	120107	11269424	3039550	273608	364416	233421	39504.1	61715.6	188170	262441	241389	68959.6	136589	243273	39195.5	288712	125190	186910	17779.8	205216	142624	476651	84020.9	174259
UBA3633	156625600	15576320	51175110	10430437	6337660	108683000	113719468	237987700	1062768200	2214.04	59147.1	5459146	927622	95003.7	343137	137316	236861	45043.9	38973	782171	606264	705720	675071	697646	71127.9	396935	165381	117199	4852.83	200516	161173	535800	71624.5	247587
RZYF01	156592000	1811560	41939800	8110670	4512110	88550200	12902000	109604000	212154000	1766.73	1350.19	3767650	104187	76596.2	29095.5	/	40732.9	85417.1	/	/	63678.4	15725.5	7377.32	/	2107.05	138149	40910.2	61222.7	/	76996.1	10432.5	7675.56	2180.87	15984.8
UMGS1901	156270960	2648712	8119470	1823706	1954947	/	18994440	49201300	251096200	/	9195.67	1958823	108546	45214.1	20004.8	4889.81	41298.5	5381	9294.59	110399	69424.6	113228	124803	66953.2	14377.5	74889.3	20705.4	15795.2	2006.17	63027.2	39456.2	114893	19040.3	52333.5
Nitrospira_A	156130134	52269190	2907810	3119600	23445500	221222209000	1438691310	4293650	550040805	37073.7	24702.6	1870200	9281610	3703020	405954	73429.3	20516.2	32929.9	40392.3	135195	184275	59044.5	105958	100363	4714650	1109670	351396	435266	102856	137911	97428.5	489967	36848.3	124389
DUUS01	156033300	2468327	31672720	4005160	3287126	180743000	20529920	47456900	234193700	/	10619.9	1842882	262747	22201.1	76139.4	24884.7	117538	3658.53	9207.59	52984.6	44512.9	113371	158458	221397	53647.5	293558	27747.1	56766.7	11550	52673.3	39815.9	107286	45097.6	74702.9
Denitratisoma	155796560	129672390	2783520	5662900	13217900	1094358000	26035920	9888550	74180800	7757.03	6831.26	1467651	165671	639859	50314.2	21226.3	6452.12	10314.8	9387.73	36297.2	45547.4	8363.56	23097.7	39390.3	34159.3	54894.4	53081	264123	13980.5	17209.8	11233.7	60419.8	10135.5	13359.1
Pararhizobium	155755150	16825570	9862850	12037400	11796600	2018183330	216518850	84099463	303493470	17302.6	37847.5	5257730	741914	744036	472190	186247	85423.1	201087	134709	505750	444554	115744	218484	306953	104803	518587	167275	401604	67286	243946	200247	655714	104568	262527
Sporosarcina	155563456	17923500	48851835	11003100	4739380	597930450	144486492	193257354	1111827160	6693.74	76675.9	9007590	1958700	141231	714823	434076	263041	96337.1	194337	1199180	697786	1098890	882157	1259900	89408.7	673115	242845	277006	8873.47	471783	336783	1238810	157703	586973
UBA8612	155284160	6572106	14680300	5268037	2459190	138475640	37799000	59928801	163578540	4328.19	25694.2	2494430	318510	34957.2	114082	62042.6	108764	15168.4	30938.6	398032	207116	321057	267024	369100	32401.4	292373	38274.7	68847	4024.86	122514	102039	308700	38114.5	114411
WQTX01	155212720	6882758	13342050	2747858	6442440	213662900	9076450	16471261	71179700	/	5872.58	837981	181061	107138	54549.2	23669.5	30183.3	33532	10136.7	70775.2	85577.1	29683.1	134806	87899.9	22779.5	137547	95959.8	110288	6558.02	87531.7	65721.1	140366	28998.2	129237
Spyradomonas	155041100	783055	854986	464787	980278	/	528155	3558571	12419300	/	2883.65	256920	20679.9	6700.55	7691.87	6285.02	2817.52	7797.41	/	54783.5	29249	12509.2	27391.7	50734	583.683	20439.2	32115.6	23288.2	1932.23	23492.1	7655.75	55684.6	9397.68	16327.3
Paenibacillus_A	154792071	17786108	28933022	8108030	4670340	459739030	202466240	102972391	604725379	33633.2	79307.5	3561950	1341720	92857.2	564186	202402	256424	74572.5	106279	1105450	629766	762256	899956	904117	96308	471976	96938	263737	10724.2	351154	291584	1000910	128443	402948
Clostridium_X	154725400	3309560	13466830	1953204	1251754	/	13770080	63044300	170019000	1304.75	12266.7	1112892	70967.7	16270.4	79869.8	33337.8	42760.1	13801.2	24120.6	143965	89210	151514	144394	164472	9506.62	140462	42456	9807.21	436.071	98619.6	47656.6	112382	19417.5	142680
Methyloversatilis	154023720	21835430	5535879	10970732	12107224	721685300	77499650	25694448	242402520	47560.8	15095.2	4116249	939441	418659	179669	59324.9	32868.7	32759.6	46179.2	160747	188828	52237.4	106945	71963.4	60363.8	287137	155481	402340	44328.1	85832	77075.8	206411	45210.4	98079.2
Paenalcaligenes	153843157	2863987	3151210	1497130	1649857	301023000	25121690	12336620	65605579	1879.71	4188.94	893536	160594	158259	254385	100921	47576.6	16152.6	33648	300926	125269	41047.4	87809.3	193049	42734.5	131700	80703.9	90834.3	27596.5	69198.6	69615.7	225223	52650.3	102157
JAGOEY01	153558000	4960800	1738720	3264230	22285300	31198000	3323870	5602800	10697200	966.778	3235.8	708283	93357.7	52083.3	2989.23	13279.6	5332.21	1561.52	2523.79	112051	10290.6	8959.42	1695.48	/	7909.35	22098.5	31969.6	85615.4	33087.9	24046	2754.78	42721.7	2025.23	10280.6
RGIG665	153538425	2996270	46742480	60604728	36565735	76162400	12112543	75939280	13902500	5625.76	12321.8	13539123	47770.7	42007.8	42148.3	25984.1	10157.5	5689.45	16338.6	32527	40251	14817	24765.7	24074	4936.1	169910	83693.2	101551	17298.2	32441.6	54489.2	85958.2	14002.3	34946.7
Roseomonas	153142690	43937866	5336920	7210520	6681360	3929769400	509197860	52882254	524957270	20215.7	44231.2	3501150	894926	189664	413963	168349	83320	124365	149212	376490	552275	149152	266531	365437	99223.1	629109	198022	691944	80410	249553	241772	626487	120022	241077
QY30	152756718	18893151	1876680	1172970	6377100	509451000	57824368	22523453	53900940	1529.32	9262.74	792702	146620	55936.8	61471.2	24003.8	33889.8	50222.4	20550.7	87891.7	53459.9	13412.7	32359.3	81256.1	21787	144506	54611.8	20909.2	18434.1	22275	14432.8	88150.7	13720.1	29035.2
Ralstonia	152543330	18201416	7378535	6157960	9589132	4284225100	223819620	24483100	240536250	48262997	43550.1	3249840	592429	681029	357130	105764	167051	94384.8	143947	455910	744712	101688	403197	201388	135789	377487	167197	1891623	69768.9	297225	206344	549918	119849	339961
LPB0142	152356000	906232	23767200	16256500	4288070	169971000	5769880	80240600	29808200	10616.3	90414.6	49334100	31837.5	16053.5	112482	47696.8	22774.6	6505.7	15150.7	63603.3	66028	16068.3	7827.51	7378.78	3081.14	759611	26228.2	21456.8	6309.84	91846.6	22395.8	81105.4	10976.9	40061.3
SL1_B47	152271000	1388810	1829730	1267800	351143	27805100	24167200	6276870	20692900	494.044	3389.19	58920.3	61573.9	4536.66	40441.4	4453.23	4302.58	4176.74	7969.03	24825.5	15304.5	13355.8	15334.6	32862.4	894.314	16022.5	3261.59	35610.7	198.895	6641.22	12280.7	40151.1	1990.9	8875.96
RUG420	152217400	5697630	9438654	5200500	4671824	196645400	88043719	187615850	150822670	11953.9	26948.8	828559	431060	16380.4	120569	46241.5	44503.3	14552	14893.2	268541	115969	178133	184488	428339	18330.1	145724	13196.1	81484.6	547.381	51575.3	74310.2	262149	24152.3	82870.1
Butyrivibrio_A	152080071	5253187	23328730	6843420	6831704	51331100	22470200	113399920	84143580	/	16459.4	3770260	221883	36210.6	133896	22725.7	22681.6	15578	21546.8	176678	179106	162503	224573	166481	16407.2	106327	34578.9	45273.8	2031.83	136123	70401.3	136832	20808.1	195204
Jeotgalibaca	152059580	1762509	19371862	3677777	2421257	/	6454350	131187800	218034400	/	8740.85	2437732	217865	15571.2	128515	63491.3	38062.7	17919.8	29100.3	154672	143692	151193	116911	150146	17486.8	120259	20996.7	30958.8	2099.16	37200.7	52526.9	166478	12534.9	85996.7
RUG410	151893738	6279280	14057700	6930329	2700150	576006700	85376334	83484745	334923390	2907.78	30583.7	4940470	500017	226859	511197	213458	149014	147806	117962	564672	738685	246336	492269	511354	78519.5	581776	245810	190917	16430.1	458605	327575	908385	133429	439397
SCN_57_10	151863000	1623050	/	978450	5921930	26506500	1160290	9033590	4960560	2015.08	1726.57	131719	53785.2	207.968	/	1848.25	/	1839.1	2560.32	/	/	/	8651.69	21508.4	1697.56	/	3503.7	33267.4	/	1741.83	1086.53	19969.7	1259.53	/
PFJX01	151741560	27258757	5023109	14317404	16406990	97256948000	143836960	15319900	14212385000	22046.3	14759.6	1542130	1498630	187617	419723	106645	55764.7	63066.8	117058	407591	151146	79020.9	170118	148798	94447.4	487145	341690	542051	30812.9	153640	72862.9	242540	48007.2	94665.2
PDTW01	151741000	4975590	51253200	3687330	11687300	/	13339800	87624800	84528200	/	18818.3	9365160	73342.7	27510.3	41158.9	18757.2	25466.1	6695.61	19396.2	139278	29556.2	34272.2	83688.3	24516.4	14999.5	73233.8	94809.7	38638.1	971.737	49464.4	44333.6	104898	12716.6	41152.2
Massilimaliae	151596100	3844450	16165624	3206585	2766000	62080900	24117810	40172790	498070880	/	13429.9	3665780	328060	32873.6	96545.5	18002.4	34592.2	6281.4	22296.2	157902	96354.1	180290	177644	219884	12258.3	166174	72028.2	34827.3	1295.18	79648.5	88076.1	169663	26505.6	83879.9
OLB17	151519096	17869900	4997270	5696405	5728410	54893594200	2610422500	21458400	362783022	28244.1	46379.1	1417970	5080080	3467900	551607	426788	108804	141680	196366	332942	908641	116309	302165	995202	226248	386991	412107	725144	99552.1	365228	217311	641015	125989	222049
Oryzomicrobium	151499000	7331560	1389580	3157890	5579410	56214900	8799190	2815640	35161600	8271.4	3721.99	849197	25735.9	44368.7	50391.6	11066.8	4649.85	6877.64	3755.16	37215.9	22773.6	1942.85	12285.8	9085.18	15873.5	32528.8	28881.6	63890	5147.39	13288.7	9117.93	22179.8	5723.58	8839.87
Succinispira	151449000	670332	4856440	3353890	1925030	/	4090000	85113100	33962200	395.583	6757.07	1226990	26259.2	14058.9	52098.5	1268.44	/	/	2590.81	41160.5	19776.9	50400.5	10430.4	13470.5	5842.79	29504.3	14012.3	46000.2	1122.4	20009.2	7951.76	29986.4	4267.79	15368.2
MED_G13	151416086	10598224	28922698	5797754	5825285	1131433520	125114910	61585267	1001277180	14584.4	45053.7	7067980	1012640	300301	21758900	1964980	13601700	8229590	7770660	2385170	10296400	5490450	15440900	36550000	149396	2665290	4037560	312992	54283.1	8442930	9955450	5529041	4128430	27773600
FEN_1279	151236560	1593699	920599	409853	1183039	71709400	4086087	4039240	19713520	114.362	4542.57	400226	62621.3	15083.1	90120.5	65539.1	6150.44	14293.8	17017.5	12717.3	59051.2	22861.5	43478.2	27766.5	8444.02	28269.1	33557.6	44038.4	3036.53	44503.3	40365	57172.3	11377.3	28866.7
UBA2020	150621690	5655868	15612564	5279513	8188940	406153900	541788730	25328072	31992530	54106.3	452219	3803163	22175792	70253.3	67070.4	22054.6	13837.5	7825.87	29314.9	63204.7	112249	26262.9	67625.1	57814.9	72854.1	150704	181043	1688121	52258.3	26235.8	29879.8	161726	18212.4	44953.9
RUG472	150245410	5386970	5145881	5895600	3373360	39977690	42598645	61386346	376476960	/	16465.8	719290	500389	20249.7	251700	22577.9	49882.5	26883.2	31049.6	202822	189812	148054	247232	288964	11421.2	124159	24291.4	72564.7	4394.92	72216.8	57743.5	309807	22453	101367
Selenomonas_B	149849700	3982550	4915404	4744480	2501340	22118770	18851295	24540480	27667580	/	16598.2	1132520	186474	10342.1	62099.7	21406.7	10400.1	9957.19	11116.1	88035.8	95481.1	157905	96425.9	33692.5	6482.09	66678.4	49593.4	17219.9	1018.8	50201.6	35888	93450.2	12194.3	33171.3
UMGS1449	149810000	6419973	33242070	5666978	4963203	90910700	61929150	69901700	622645600	/	34466.8	3107335	409639	50355.2	104049	124197	159006	4713.49	56052.7	231139	251230	373408	438971	247231	24264.5	168760	32768.1	50737.1	1422.87	138171	112438	192705	51839.9	101188
Lacunisphaera	149602730	25627517	14987006	4740510	5075780	52405965120	1879515160	15642835	262912252	20314.6	49454.7	1033910	1762260	4369900	466188	87254.5	210399	512780	65031.4	710338	293075	123256	181759	393769	1262210	4978640	1523490	5048530	285214	196392	132751	368909	59144.2	151456
Aequorivita	149285160	7002880	52373250	17108106	3998740	584922950	105092793	281237400	695966830	44331	422692	301058021	2687060	274255	1020730	428147	330664	509553	309145	709187	884276	329197	579147	636859	111261	1964400	371026	214857	36059.4	445015	387457	880664	184414	452839
Rhodopseudomonas	148669870	12705865	3395690	2512390	2832770	2140879300	264744110	12555800	291613670	21210.2	34897.8	1216140	644584	187272	346723	202751	72466.7	83884.8	146543	350390	384024	98633.1	190691	165761	95004.4	509058	164281	461491	49648.1	170295	115996	381392	84918.6	166185
Azoarcus_E	148632000	10224400	13105600	47076400	3798810	649644000	76652400	41175400	67973200000	41279.3	113675	66393700	35206900	43023.7	22038.7	7116.09	13014	20470.7	13959.4	15975.2	25043.2	4140.5	24512.4	34482.7	6962.23	786311	16541	25072.4	3163.33	20179.3	9864.94	13927.9	6205.67	21100.4
Rugosibacter	148464980	29105804	3175660	7485191	11973523	1592728000	109964840	15716078	1252487700	2955.46	16777.7	1305530	987710	478458	182691	53796.5	10853.8	29489.6	103043	162909	107445	37964.7	100431	148300	120962	201530	144951	388440	30703.2	102914	61947.8	166223	58986.2	119679
RUG626	148382640	3370540	5940480	5790701	4363658	123223350	52478395	24351180	79497960	/	34771	888373	222249	25980.6	135516	16954.6	11514.8	10840.6	22824.4	164055	232413	169902	253942	188082	10169	234410	11133.6	49762.1	1695.97	64798.3	80719.2	261021	28661.8	81933.4
Aquimonas	148258010	3473136	3617840	5400330	7818660	1024628690	60834940	13116780	1295668115	2402.62	20415.9	6093160	864216	191137	178242	60272.6	16024.9	49575.4	64117.1	153918	72782.7	10165	66372.9	82512.6	21757.8	903695	260217	338544	22854	52270.6	35522	142261	42726.3	83789.4
RGIG9608	148052300	3010351	18676454	3025562	3920080	144910300	18708210	37244810	124196900	/	5887.73	512040	262448	36480.2	94313.4	35745.3	8714.94	24441.2	40806.2	112713	106868	31860.8	54996.7	101572	12336.8	94528.7	76701.2	140413	5521.97	97065.6	69283.3	189607	14952	60474.9
GCA_2704625	147886226	6926150	21931375	5874470	3558830	263520600	106832301	63849871	1033418981	4493.75	66179	7416720	823809	331655	3926730	2172200	1513490	2962530	2002890	5283140	6139760	1294130	2590310	2900080	178662	2485650	2216580	257877	23382.7	2921190	2858030	3104450	1246570	3030010
Tannerella	147530000	905142	1799210	1567210	1162850	51716500	10620902	8768024	35387507	445.783	2391.07	333003	146429	23017.4	101251	44126.9	24631.1	33563	16195.2	174767	46230.4	19825.8	55816.8	58777.7	7658.17	117111	41036.1	23299.3	1558.58	44548.3	42891.7	140365	8466.58	71920
UBA1081	147278940	5316144	16965278	5641927	2156080	678972400	48451971	83620930	311651900	/	28697.7	1513720	352822	39346.3	190258	40297.2	55359.2	24646.8	73161.7	369144	246472	297834	248556	339071	34619.7	291285	57297.1	83699.2	3053.28	115780	130863	419360	37435.2	106277
DTHL01	147181000	1284370	1647970	2070620	7480260	/	561519	3624690	37064800	1068.62	4574.95	222860	57486.8	27336.9	12814.7	1651.69	13503.3	/	23462.3	75923.5	14582	6019.58	20101	19699.8	20324.8	18620.3	14417.9	133439	609.977	7176.01	8662.03	21138	5733.66	8535.11
Opi_474	147051380	75015090	9604258	4097190	3751636	3298397630	4476407000	16411963	548089100	7957.09	177875	593464	2323340	372203	139502	73635.1	113334	162537	59624.8	1349840	152795	53447.8	89110.4	412915	229515	408312	446118	946379	55556.7	92580	67542.3	197338	43593.3	89044.3
Succinivibrio	146486531	5217570	21548500	7438910	9160400	343950900	76256818	126866669	367240820	3501.15	44015.6	14338300	403765	142132	730267	518811	105636	247223	343681	855407	709908	359518	549413	622837	63602	696322	207123	234056	25944.3	521342	331224	919701	184178	438014
UBA952	146464332	26927741	18328112	6500900	10169053	868648660	167306553	73263539	846599638	48695.5	81315.7	4862980	3474310	548306	32316200	20116000	1961940	2460460	18828700	8779900	5802330	2014320	2784510	34315900	975650	27426100	13502900	554257	276107	23574200	37397000	17693200	6335750	31788100
Ensifer	146282310	7925811	2433980	2642470	2245460	1023948600	127474280	11758010	110852004	5220.36	12493.6	860590	266770	171005	256938	94718.7	36290.4	82067.2	79129.2	238641	203898	55255.8	107617	148735	56401.8	526648	95155.1	198603	26470.9	107310	89197.5	235076	39804.7	105983
Ureibacillus	146248810	13005376	41122355	9431343	4739490	323204270	119403966	139290950	883369560	2385.37	68826.5	6628980	1049800	119888	459142	149377	278607	75602.4	101368	857028	482960	932773	856341	770096	75106.4	524260	145047	117972	4416.59	346958	295233	810189	121450	355583
Senegalimassilia	146214120	2699560	10977156	3757380	7700179	101471530	13414057	80111190	110782830	2114.54	24874.2	4652204	258418	14624.1	353521	118346	148606	44906.4	125610	88494.2	2538990	1049670	767653	1679195	24918.6	208206	132545	38747.2	17870.1	278623	49628	171626	46528.7	161486
Enterosoma	146164930	13047828	79795375	140296708	8192580	212742700	101193630	2979165600	980811920	1160.13	55550.9	14595500	1266150	82237.6	379913	159456	116015	23609.3	76245.9	281139	471669	478646	474862	592464	36365.5	488505	125642	112934	1987.52	207908	189244	631422	72099.8	224349
JAAYBY01	146152162	3638597	20099300	4044236	3641988	101490000	16871092	112566460	173575940	350.77	14045.1	544981	288156	15711.7	92075.5	7614.42	41930.8	/	14491.8	190145	51917.7	79166.7	56810.2	47086.3	6974.98	103010	31095.4	48470.2	2351.73	46604.1	33467.7	119098	17808.7	64148.3
CAIXHP01	146127000	1008760	1460520	1579870	2355100	240165000	20682900	2322150	4623630	/	5349.59	149903	38667.2	10139.6	14379.9	48891.2	29532.1	10617.1	15373.1	23150.5	17358.9	15409.6	6929.67	2174.68	8197.62	55250	30074.8	95692.7	4192.74	10163.5	12147.1	43924.5	8118.41	15301.6
Planococcus	146024952	20021300	44400100	8664920	4721690	555592980	228537181	148198019	1234378880	8466.48	81519.4	4124560	1879440	118358	572901	169067	277692	76955.5	130560	811414	783097	994427	977053	817856	121953	578789	209086	198639	7174.32	369458	326236	1099720	115990	505498
Methylobacillus	145898366	2374200	1179740	1319220	1914040	278869300	13023090	4428280	26578650	29904.6	2893.98	352230	44911.2	26128.5	39416.3	20315.9	18985.7	12621.4	22772.5	90935.8	54032.1	8668.08	37834.3	61969.8	7625.45	125748	37417.9	259932	5208.34	35584.7	34214.3	78233.4	18556.5	25914.3
Clostridium_R	145735000	3863000	6423735	5379712	5838330	40799400	30033261	62250600	146435190	/	11150.8	1018520	177590	12405.5	22051.3	17916.7	27434	2685.21	6703.73	187007	83049.9	100738	78022.3	81291.2	14135.1	512882	32194.4	27665.2	532.993	41865.4	30638.9	91481.4	14432	21025.8
UBA1794	145317600	3064318	4048110	2371050	3171880	100116000	7957620	40123100	35375900	/	5058.67	576008	42903.5	13065	84379.5	25064.2	34421.4	6442.9	2412.01	194141	60721.9	24570.3	70695.3	27101.4	4219.95	34434.3	21680.7	60659.5	8102.73	22595	27474.9	97958	10653	25905.3
Aminipila	145315940	5481545	24749330	2849160	4049632	210629400	25780030	323493300	94216880	2073.16	20210	1932570	387482	40982.7	115610	34795.8	22113.6	10717.6	24129.4	153936	93440.2	168569	158791	182584	19467.1	143110	23662.3	81395.5	3787.36	86591.7	54107	242874	23981.4	106544
Bog_1340	145184790	9977091	8325549	2769363	2589803	2813835000	103482570	35648120	527710520	/	20267.7	1857574	1268580	323027	326942	71049.4	70657.9	8267.58	33344.8	251179	233868	319550	210740	77625.5	188886	983158	334703	358452	33521.4	88238.1	54544.6	132516	22536.4	51000.6
UBA1361	145128220	5140524	10774750	13181626	2220291	331051000	9379043	134891950	104766600	512.26	19688.4	1950744	666740	49589.6	52552.8	34177.2	8445.43	18979.1	10530.4	73230.1	165862	84773	319503	242014	17273	98361	25232.5	27580.2	3826.95	39562.1	37849	167537	10649.9	83575.8
Clostridium_T	145057444	2236200	10046430	2477670	960122	48140900	27183000	38238600	266341000	549.074	10577	1767339	178520	25895	55874	24550.4	48678.2	38891.9	15404.9	147301	92191.7	154590	140805	89082.7	33545.9	58445.1	24431.1	60531.8	2782.48	62785.1	49031.8	121944	18889	71242.6
Aphodosoma	144458730	3581520	23462327	5461637	6676880	667557000	21234562	35962980	93568218	1919.36	8947.25	1281830	234048	69506.9	241027	83244.8	85879.3	55889.5	54600.7	150758	255980	61575.8	195613	211218	15157.1	183204	106978	208998	9543.85	149286	101363	267716	53348.1	177668
MS024_2A	144263434	8088360	23658406	6389790	5245762	911793200	101289701	68785139	694196730	12795.8	45395.5	3704500	1089040	408260	65870234	24370900	107687000	49017800	20476900	85244400	11838100	32705200	17767100	70446600	320099	10882200	104016000	601520	85730.2	9919390	7270480	12752600	3329050	22256400
RUG12438	144052920	4992894	41505870	5585978	3818149	59718300	46573480	80386850	1116871300	2512.95	21075.9	10322228	315754	179433	140764	18869.3	105971	60832.1	18866.9	713190	221118	348961	408845	749940	21278.2	205191	45903.7	39958.9	1399.92	77489.5	81646.8	260835	32070.1	142357
UBA5767	144022300	1875534	57185940	3671197	9038062	99382800	9803810	310426000	72116660	/	3373.97	1755447	50632.7	7560.11	19094.3	/	33258.4	1051.29	4127.01	61306.5	36690.4	83303.8	214367	40758.6	2611.26	56609.5	13628	43895.1	547.136	86337.9	21879.9	74684.8	13817.2	136315
Methanobrevibacter	143773721	5501240	16915700	4251870	2105810	119208300	23861701	87131585	863812270	1690.64	27882.4	2813180	454395	165908	398454	114673	95417	106675	75461.4	393696	453297	502834	706834	447937	47443.2	298053	237766	64580.5	5505.42	304990	264446	787434	114742	267079
UBA2256	143403070	6533959	432902	760739	1132138	62531300	908704	6302958	25550670	604.373	1441.49	407350	20278.6	10310.7	15147.8	/	10837.7	2483.42	1925.41	41674.6	32946.7	12535.3	25543.3	12195.2	2408.67	16329	21807.3	41538.7	2012.29	31242.8	23985.6	63342.1	5594.61	17447.3
Adlercreutzia	143356549	4591350	15076100	3453268	9659301	65157920	41868270	82519205	55649870	1474.22	25466.7	6154730	230721	9529.71	58938.6	22334.3	40304.2	3307.98	22139	55899	102606	203702	102939	164224	6429.43	102002	11178.1	23260.2	15438.5	48521.6	31958.5	146234	13247.8	27979
Brevefilum	143250636	5009636	6996640	1884890	1699420	1385742630	70237348	35202821	469404160	2114.31	10781.3	818770	129633	66365.7	182128	98654.8	28652.5	53329.3	72867.3	384454	119640	90973.1	117396	156555	26064.8	483348	90681.9	60384.7	5970.55	124218	85282.7	348942	47206.7	127814
Pelobium	143147390	7159721	17071287	6077550	8866570	695944300	65223845	58077967	438567320	1389.22	28186.5	4013950	733665	315115	709624	166325	191010	255109	187181	482147	730796	239730	529455	423095	177415	525450	305666	329832	46046.5	383574	267389	751920	117752	365681
Geomonas	143037430	372058860	18121800	7013410	2154090	803220930	359513089	35970025	197845159	4455.6	31334.4	1246760	1535200	61941.7	304003	99908.4	103675	52930.3	57645.9	396012	413143	186686	271852	325853	42091.6	213964	125409	297466	21556.4	190481	152083	477355	63735.5	171822
Pusillimonas_A	142821620	7584055	9076848	3702450	7257542	298874600	27258550	16384267	149340180	6006.46	3990.75	1760940	386362	117062	2673350	636310	877492	2159150	736838	1474990	1514720	753253	716861	840099	53602.3	929321	3357230	129333	30722.4	2297260	1049120	1139860	397408	2913530
UMGS1994	142820260	3785649	25898980	4147437	5007863	/	24373970	97425380	694149520	2934.8	29910.2	4861720	335348	46191.2	108206	52203.6	55813.2	2847.29	33403.5	480084	176732	253319	287993	607251	30042.8	141873	25340.6	85435.6	3762.7	101089	75437.3	189739	40391.6	103196
RUG762	142360360	5332700	14035366	4718120	2088610	421167000	82063630	56851688	222942380	1439.39	24282.9	1471200	444480	37461.2	173278	79893.7	88508.5	37719.1	26741	343308	259229	191144	354606	370320	21305.6	197891	44598	79548.4	2654.97	137268	106557	284946	39620.9	134861
Fusobacterium	142250170	5511600	39795244	7787184	5826370	233671000	61881046	75689377	646294160	1520.12	27851.5	7713855	476665	198282	1566340	980744	335787	228480	566654	1750030	876301	836157	2751310	2029200	45168.6	1527790	369679	100794	10431.5	701207	529910	1147790	430547	564508
Kosakonia	142195630	4039280	10429807	8643539	17327596	210658160	42770357	22942760	106177513	5012.4	15175.2	8303399	124837	101147	203907	202448	53286.1	104996	117760	297563	199382	83422.3	106286	203908	51538.3	221376	97293.1	488664	22487.9	90673.3	85646.6	218200	57730	95410.7
Seleniivibrio	141973546	2199190	25188249	10589523	2992014	46903740	4554409	41513175	39342290	177.466	4238.53	3252170	36738.1	20223.1	16595.2	19068.9	11130	15423.5	713.066	73609.2	39634.4	23409	20738.6	6453.01	3272.99	46378.8	37918.5	365387	3102.3	25616.6	22718.3	60584.9	3490	33401.6
J065	141860000	424393	611195	264644	87823	76163500	7058740	908215	4408090	664.256	1219.58	37556.4	27350.5	4520.54	75806.2	39676	1724.54	9694.92	5735.13	24025.3	43703.8	13018.8	20799.3	3411.44	2976.67	12663.9	7006.4	11968.5	466.263	8401.91	12465.8	27130.4	5340.19	6812.46
PALSA_600	141560573	946049350	3753567	3168850	634408	637525600	10551974400	47235340	150655240	14311.2	883833	645465	694077	38800.4	65407.5	21084.5	41629.5	12502.7	22356.6	152468	216423	189506	163648	106880	117055	94953.2	73011.1	704565	52865	107217	53919.9	211724	22986.5	92573.2
Coprobacter	141506390	1119266	5878972	2924990	3738190	34174700	4896497	17889840	24289290	256.492	7006.6	2155220	42626.3	24592.3	96262.1	32149.6	4401.7	4739.64	16462.3	62528.6	82385.2	19809.2	60050.1	68434.2	7132.3	98267.4	21830.9	21997.5	2819.83	40287.9	38611.8	73225.3	14471.8	26666.2
Capnocytophaga	141489990	4526930	15372203	6061480	3761950	933542490	57031724	108688020	470458740	2424.29	24143.7	4292930	711238	204416	848881	139687	190002	224067	222068	531214	755616	273312	608878	410168	75716.1	804295	264715	153574	25992.7	404020	290200	541857	101636	383058
MGBC124762	141476669	1907290	2537380	2155222	1356430	162852000	11444680	13617850	18283600	/	7468.92	317573	97011.5	12612.3	38081.7	6385.38	/	4608.36	6231.16	47036.6	87807	49166.5	29869.2	9979.61	6767.47	21794.3	6349.68	58979.7	267.568	11546.1	32832	127627	6114.55	15835.9
Aalborg_AAW_1	141408000	1547860	6852450	9088690	254065000	426900000	16178700	27671700	122275000	2705.04	3338.36	1493640	241159	741227	9432.86	125059	/	11974.3	24382.6	61184.4	/	146649	46214.4	59022.5	115361	143760	57992.3	138015	22848.9	8932.96	7685.31	30919.9	26915.3	29019.7
Actinotalea	141179692	24168650	10604166	19050819	4059626	2062992300	327116820	99037990	418090030	4984.93	51889.9	1512310	1540780	90712.7	430253	78292.7	106483	20911.8	60787.3	415550	499239	292649	382290	605493	83876.6	264771	83536.5	235421	19797.4	356660	195624	535847	123017	1019470
Gulbenkiania	141148000	4991370	4798120	3645230	9761470	184097000	3649510	15295200	12821600	140.153	8429.75	4819820	104698	41382	10392.4	13600.1	4574.33	/	19999.7	17025.4	23740.6	459.649	7052.7	8073.22	5051.38	23667.4	37014.7	71609.8	2150.91	3337.04	1190.92	13946.8	13662	1851.18
UBA5272	141136300	25797270	6597740	4951608	9111860	388060000	36497700	12051700	396492000	/	4736.8	2430443	1366011	915364	40807.5	3174.82	35001.5	81453.3	17270.2	29430.5	52073.2	44724.8	129120	34475.7	379832	308991	136016	305257	66954.6	44491.6	49264.4	58257.8	6907.11	62184.3
Chiayiivirga	141119000	949840	804108	525627	441184	159709000	18750600	2154810	56319200	721.815	1807.32	277795	43738.6	15983.9	48155.5	8956.1	1695.79	10369.2	19824.2	4083.12	13523	9231.32	10499.4	14820.2	4653.47	33367	8215.67	83360.8	6967.73	8556.93	12660.1	46843.2	5269.22	13139.2
Dyella_A	141050160	5277369	9619982	6596288	2185230	629038100	54215290	8039499	39177350	14513.5	65253.2	67226110	1442420	33288.6	137749	23779.6	4924.64	7370.46	21732.6	41830.9	84485.6	18251.4	34680.5	32741.7	13009	68265	20920.2	78356.2	4425.54	30326.9	30083.7	91742.5	19221.4	28727
GCA_2746885	140835010	5435847	5971852	4229015	4856284	1127477400	126161630	66925750	684826400	755.346	18562.7	4975560	1150370	409798	115438	12401.4	44090.5	24060.2	18986.6	129654	101626	81386.8	68315.3	61537.3	41953.1	725390	82891.8	310291	22379.7	54560.9	27443.7	72959.6	3884.41	34224.1
UBA1786	140620200	2211490	6212921	2922560	2916609	99977690	32010983	37590837	61488338	199.971	17173	1111500	172765	60441.3	284659	118816	45219.6	28387.1	94953.8	273881	463155	92833.7	233974	318678	11725.7	260024	96328.2	70506.3	6808.55	181964	189263	513824	55063.7	196675
Methanobrevibacter_B	140585380	4389365	13383624	2214810	1136355	17520000	31545449	37499650	557378620	1724.54	15107.7	2050934	245684	29473.4	88414.3	136730	71028.5	25611.9	56882.6	385071	135964	252318	274314	183075	15806.7	168004	95490.4	65436.8	275.671	104457	82045.2	241325	42496.8	89004.9
UBA5456	140580300	3341443	11322871	6131171	4508380	29849000	15609130	33383753	149952880	/	9074.74	1076280	141634	27911.9	71949.8	29065.4	31381.5	23381.6	33654	92531.3	95630.7	92158.8	81898.1	63548.2	11799.2	86824.6	87541.6	191658	4752.76	51662.6	21621.4	141619	7362.9	57045
Photobacterium	140326160	7053760	63012091	20655300	5956520	472197620	111293649	268128162	454516255	2782.44	44084.2	19787500	551311	235395	1236070	738631	271711	373504	1207990	821631	1052670	308721	583844	1022730	77015.7	994294	380477	214703	19029.3	684737	624662	1188370	300097	783997
Anaerosporobacter	140209300	3453152	35125760	5438936	4880699	/	41031310	120999270	94380690	3810.17	21017.3	12081106	143332	24605.1	64421.2	22474.5	37956.3	15615.2	21107.8	68018.3	72106.2	162862	130853	302246	14382.9	171233	26290.6	34441	2598.94	52702	58216	156691	17765.6	46742.1
Zavarzinia	140201648	1478350	3079350	1558820	709487	112389100	27158037	5905523	45187500	1255.17	16384.1	7252310	114573	17553.4	72616.7	11328.1	8492.87	5163.62	14168.9	31990.4	68806.8	11147.7	24622.9	22138.1	11511.9	58421.2	15010.2	70409.2	3743.86	21340.9	19454.4	82075.2	12446.8	23285.5
UBA2922	140164770	857798	3443750	7275210	1190365	/	23676815	45810290	572421500	/	5632.51	193810	116788	10836.4	40487.2	5041.88	33335.3	6402.24	43327.7	16129.7	45367.9	36245.3	101746	15100.5	1859.08	27691.2	4270.12	22870.7	1417.46	24856.9	26434.5	114998	8324.85	20521.1
VAYN01	140064370	53539370	24998500	16041069	51424756	5630843000	1475188200	33455307	384819410	186280	71036.4	1824170	16561248	95671.8	370235	77303.9	110285	22311	17952.2	86269.6	212315	108611	185541	167964	199285	947051	444119	1421480	147091	104378	78715.5	259832	25944.8	106258
Methanobacterium_B	139867555	4976932	7303226	1889974	3211389	119931100	32736940	36918040	327044250	228.337	20555.9	1599190	464708	45662.9	167126	89160.8	49834.3	22599.8	63272.7	270499	170752	156815	238082	307365	72377.2	151052	83061.3	124670	7745.6	182570	85016.5	366064	42278.5	154384
JAAYYM01	139796000	1782160	16672000	3012830	5086050	/	4548050	100095000	53731800	/	6184.6	1247090	64971.6	9024.81	55186.4	4465.89	5746.66	2631.17	851.868	28794.7	2254.19	23835.1	34349.9	31626.8	5781.48	219172	10243	26645	1200.27	10701.1	9676.2	33675.5	4032.94	11523.8
UBA12077	139725801	9303030	76046510	5724777	4234074	575115300	64197235	52284910	290385260	1692.31	22561.3	4097570	403721	111489	624442	406174	123350	161350	382805	357948	1744790	230131	493231	1488670	46844.6	606807	213076	150687	8698.05	385981	213684	524662	125267	321277
UBA1774	139717340	4296174	7936553	3560360	3037138	184705400	42933820	25278760	148782350	1038.62	20813.2	477527	332626	16867.4	69627.2	34020.8	50755.4	10576.4	13396	75553.1	161643	97234.8	90112.7	135224	7193.52	75087.8	18502.6	71266.1	4015.37	38555.4	35458.3	251888	27840.1	49389
UBA699	139704800	2646720	8333350	1265250	1327790	7420770	16458050	28158800	24570600	/	4513.35	1035794	159477	10027.5	4097.57	10079.6	31634.8	1030.34	9669.59	18613	18513.2	67566	67102.6	/	1555.07	69214.2	5669.57	39508.8	762.294	37297	8351.59	49754.2	1606.85	26059.8
Intestinibacter	139264140	5487464	34142970	5948720	12941606	52449050	147127780	419067210	368765330	1667.04	28846.6	5664600	392407	35606.5	96972.5	23491.3	53512.7	19391.2	24972.1	146765	97307.5	217799	210295	212033	40317.5	131821	35618	46798.2	2381.03	94552.6	26731.2	130510	31733.2	65702.4
SZAS_103	139257983	17382769	1765320	2178138	3837575	6785708500	671172100	7534083	152385450	3976.46	118074	1806069	225168	79990.7	88934.6	63960.3	11390.7	17823.8	64241.6	130343	140077	35029.4	41558.7	74834.3	22915.8	101850	57863	84242.5	9647.75	38738.5	40674.3	111173	20504.5	42143.6
JAAZBI01	138912000	3799580	26665200	3351150	593395	1257650000	204793000	52189700	330466000	/	14126.6	2904300	391956	57544.3	5253.69	23172.4	108540	55008.5	/	89170.4	64904.7	53752.7	123873	22336.2	20039.1	489328	4961	8567.41	/	19305.9	19926.6	64189.6	17002.1	58425.3
Eubacterium_O	138911060	3176965	3739030	7052373	9670311	40912300	11118795	33508400	30035150	/	2491.85	294179	127258	12497.4	23392.7	4593.78	10870.9	/	3871.51	60950.9	21186.2	9363.76	29316	20153.2	26505.9	27937.5	82697.4	499025	5620.2	14314	10085.8	74207.3	1815.73	18172
RUG14130	138775090	3433270	5045120	3113100	1499920	505036500	49612510	26545000	68230000	/	13646.3	404318	119204	13922.8	101190	37813.1	37989.7	13808.2	19780.7	263632	112114	65840.2	161038	153791	24471.7	51000.3	28684.6	83393.1	2719.99	55810.4	25567.7	104984	28243.7	35325.6
SIG200	138766400	6106520	18418290	3735953	4798943	54011000	65806310	91393300	333239300	/	19832.5	4562580	746902	56764.7	260680	246715	108617	10324.2	83444.6	222213	264781	254732	428581	381601	58217.3	464424	72025.7	64241.9	2567.33	90979.5	192390	390565	39129.3	308230
Caballeronia	138643194	31030880	5906940	5586230	7255800	3852357900	582702850	19007600	445349410	76096.1	50257.6	1798750	1184290	532752	1123460	329366	105068	271953	259637	1057400	809304	205431	369916	528964	176514	1070190	304643	836109	85229.1	401791	290135	819873	168054	405030
UBA1422	138535000	3143681	20569770	11992581	3614298	99417700	9727924	527158400	15821460	4876.61	8477.84	1326990	84025.2	14122	20433.6	1009.87	29773.1	3197.53	6979.36	46944.7	91883.5	49218.4	60153.9	21597	/	414162	9679.11	131223	2306.81	40693.3	17648.9	58587.8	4774.55	83065.7
Aphodousia	138457400	5131040	10253700	4196350	9736150	597420100	71791891	18147807	288485116	4268.48	17360.3	2988335	219012	147744	448419	157735	68927	82139.1	101065	629539	248115	73538.6	207002	220799	72056.5	399894	142704	219846	105479	264508	134739	480967	89008.6	268644
Avelusimicrobium	138395620	2108120	3697972	1435380	2441310	112560510	21008993	8494387	138778964	3951.35	11644.7	624500	93385.1	29085.2	88059.7	56118.3	62165.3	67182.2	36969	273851	172959	88990.1	183820	93837.4	22621.2	117106	32637.9	47290.8	4266.92	158765	73327.6	264650	32839.2	81760.7
SCGC_AG_212_J23	138236450	346511200	1145360	1383680	643798	1012549600	1088887700	6030926	100052480	7016.98	110617	808305	197307	94438.9	254089	49508.2	41784.2	66197	28994.5	227243	215640	34113.5	74051.4	137229	211948	174687	391320	2349140	128165	128490	77819.5	298098	62892.5	113577
Gemmobacter_B	138224170	7275259	7005190	5518730	13895455	743959490	71292530	55864380	282747670	7151.22	15825.1	3980560	503629	180746	375204	174238	67013.4	139967	109427	530840	255586	118929	130336	108034	541087	1870580	361526	413381	530831	114735	98338.1	455929	80945	197039
AWTP1_18	138027000	8953160	479287	850575	1088870	352132000	11524800	1073920	7273650	1910.5	2274.03	157963	1713810	94474.8	24587.6	10251.6	/	/	6357.85	5173.54	14770.3	6455.52	8967.53	/	33284.2	10829.8	119860	154448	11449.5	20234.6	9348.9	29002.7	3697.61	8589.73
JAABQG01	137988332	18495334	1983772	3604720	16167067	671794650	54070101	9817058	151303040	63764.5	9287.54	1034530	293396	198410	157794	42543.1	18129.7	14671.5	24830.4	129053	67152.4	26763.7	48705.6	102739	163637	173210	410845	782448	100730	58360.4	34248	65965.8	19955	45438.3
JACRCG01	137781900	117182390	24315715	11926946	5077090	1189094090	125165270	50455505	264730780	5366.11	32698.6	2525780	602165	76667.1	313276	114540	90388.9	39651.3	95079.9	336399	329569	316347	367180	456414	90648.1	367419	275663	1373230	31667.4	207635	153618	497902	65346.2	210936
1XD8_76	137769540	3080358	13258200	4481848	6725333	85555600	26789075	90164290	71387066	2091.29	19659.9	2381800	547535	21439.9	94382.4	36151.8	88443.1	21074.7	17129.7	333291	123837	216940	189098	188991	18401.3	118004	20310.8	52592.6	1597.2	136199	68049.4	226814	28079.3	142857
Alectryocaccobium	137753120	3880874	9921240	2234050	3152640	122887130	37978420	59772550	102660500	/	13469.6	1115910	203074	24715.3	59043.7	31457.6	68505.3	5407.89	29458.4	37536.9	91472.7	281711	79840.4	72065.2	19046.9	83590.5	37203.1	50060.3	4060.02	61017.1	48999.4	171794	12956.9	67969.7
RUG191	137188370	4209400	23420540	4072490	2660720	35351400	26964321	111381110	433893100	/	16155.9	2903855	281695	41643.8	155242	150656	31472.7	31358.1	68322.7	394121	199932	317691	322682	446383	42707.2	513535	54655.4	57110.4	3387.91	93209.7	58726.5	302714	37478.7	124799
UMGS1370	137164000	2166180	11136613	3868191	5790851	60976670	26509613	69933980	124767760	564.578	15825.9	4688550	194995	30213.6	74566.9	29280.2	14777.7	23664.5	2827.43	165147	57816	149332	103285	98721.2	8948.38	70959.4	38657.7	36573.9	1814.41	64192.4	35495.9	168049	23383.6	99213.3
Xanthomonas	137132023	11925100	6373590	4572930	4238910	1146499710	295446910	20163500	293083975	16873.3	30792	2167670	914196	238877	678633	146728	65988.2	149385	143170	476940	643821	131499	270757	393814	89699.6	498870	148270	498991	39010.4	248856	203336	664352	111975	220602
CAG_313	136467670	5339577	23413462	6481017	10457715	15311500	36739050	116535700	428761870	1974.2	45811.3	14592860	353779	54257.5	100049	65891.9	49246.2	32447.9	42758.9	260359	208103	294399	253081	218008	18353.4	123453	56626.5	44676.3	4765.68	193424	94628.4	261425	48493	273058
UBA1413	136149760	4977231	10659219	3668450	5742049	74003780	28007692	18630966	173066270	/	3977.87	750260	168049	57362.8	127286	30403.6	35183.2	6566.54	19971.5	83115.2	80924.7	50566.4	92754.7	90944.6	24376.3	179018	73891.9	84253.4	9783.84	84180.8	64359.6	152531	29758.1	73549.2
CAG_411	136055520	5866530	37933714	6314338	4573261	149679930	48626760	119580250	241999100	441.977	21447.3	5087333	564179	29944.3	93873	54681.5	22318.6	32337.5	43328.5	305286	170849	299644	252733	318283	26064.4	150918	57117.9	74436.1	3179.29	95215.2	114309	301492	43542.7	109193
Cohnella	135951690	15398800	15852492	5791740	2999820	585018490	510958420	74073610	682286930	75786.3	848405	2141700	2280070	96598.1	1658550	676245	636523	137586	583984	1167210	4092630	3482430	4071010	9273940	147862	1209540	256159	254323	13982.4	1446650	928603	3467880	786140	1430360
SABI01	135220330	5260610	8435070	4538040	5862700	18063300	10065700	33430010	15477760	157.652	5318.97	2822270	101195	54188.8	56021.1	18582.8	8504.46	22090.4	1168.3	35984.9	51688.3	16321.9	38347.8	24870.6	9154.38	346830	47893.9	55497.2	1204.15	39283.2	22095.3	65724.8	7995.29	51957
Smithella	135219810	10571966	23866614	6663980	7003730	1192024180	75976440	55788732	363625540	3834.27	30216.8	1553390	418704	76893.9	267035	77461.4	137854	39559.7	69197.9	517131	277600	379378	279585	338117	40021.5	292560	147588	324776	10336.7	165794	117698	413941	47304.7	285074
UBA1240	135177670	1316050	3313370	973513	417386	47215800	5702729	10137484	71624130	507.07	7373.78	848168	187835	55418.4	76779.7	45785.1	14715.8	12926.5	40939.4	110426	134200	56338.2	73919.5	63912.6	8325.29	118039	15490.6	17574	2121.83	67740.9	68197.6	194041	29196.5	71586.6
Pelethocola	134805430	2995285	23131269	4476226	3347735	113646000	22107363	113436380	169963290	1106.01	20017.8	2046660	274083	23275.3	49718	41612	27295.3	7132.45	24686.2	244573	261034	157500	99980.8	205781	8551.88	62579.3	27037.1	53226.5	4665.33	54217.2	62929.4	152220	33189.7	96283.1
Methylomonas	134423230	13248870	12361869	4651080	6993280	964060280	166486939	28824344	215995662	5176.16	23917.2	2390800	452963	250299	449498	184281	104735	141970	121716	558738	286393	151481	288225	299754	124357	849857	222756	604655	46183	212211	191498	571142	115428	221417
UBA7707	134295000	465118	2180330	741227	1778830	/	11496600	6430650	30793500	/	/	53490.2	51115.6	3259.91	5760.21	/	/	2832.65	/	52361.7	11121.8	/	13250.9	13767.1	2697.96	13678.6	/	2359.39	270.227	4981.47	13327	29212.9	477.865	3574.5
Gallispira	134207627	5676899	20127110	2512247	1812770	88111700	47097991	82170820	312496400	/	33870.5	1967300	414476	24308.1	140449	39043	29916.1	40221.2	26816.8	146223	203761	188188	295773	211545	19004.1	110636	109615	73862.8	2440.79	94134.3	69150.3	233531	31495.8	142962
UMGS1590	134146817	1638580	9051923	4325113	12221908	/	10091343	92260320	44975890	1416.06	9577.98	5126817	107511	4393.79	38051.8	10442.6	8278.04	21770.3	14819.1	44966.1	31224.2	53967.9	46035.2	66813.4	9551.88	40627.2	11992.8	54579.7	12697.8	35087.4	27804.2	82507.4	10104.3	11272.7
Janthinobacterium	133885629	27794399	6434290	6041140	27051400	2839761220	297613980	20140000	427094520	78433.5	36489.9	2002717	877328	4289290	600729	180512	81396.8	152376	163359	672152	593640	181711	298862	426428	178176	796495	233240	657488	86927.8	289812	202216	665140	116836	275391
Papillibacter	133663000	1922350	1667880	4248620	2221330	44518100	18714800	25726600	7366910	1849.28	1572.98	236967	69098	2874.43	40341	/	3511.78	5741.36	/	12506	17097.5	31734	7184.04	9536.5	2117.07	57149.2	4922.39	36739	533.909	7229.47	4405.18	22576.9	116.161	2998.43
Serratia	133323035	4442380	9817580	5499050	11133100	513817370	140302403	31845026	145511899	3228.14	16447.1	4227860	352762	155896	277149	157647	66641.6	77830.8	157791	291296	294588	58663.3	135636	180515	44451.3	369058	98967.7	362117	20678.7	127527	121030	384988	74608.2	136951
Leifsonia	133222216	33010507	14584088	21039882	5746550	3046418400	679332800	91916564	782277400	73577.6	89677.9	1931010	2651740	128144	524739	96564.2	114727	30946	53211.3	888674	456687	463057	345808	686481	168279	659136	91263.2	402358	35616.2	196131	210624	560743	128758	223460
Geodermatophilus	133108897	77661659	12379800	10129800	5137560	10110130400	1253586100	77940675	1318169300	18833.2	110936	1663180	3363120	158782	1124260	218968	234439	53476.9	147312	942451	700608	672327	610298	853140	250156	1036450	144131	672604	45651	290150	321673	787102	170241	363793
Nesterenkonia	133080669	30172821	18064200	12853900	7145530	4199328330	452923700	211833544	612666540	3245.89	90207.2	2852130	1939800	109642	574921	129562	163663	68401.8	131720	1165230	600667	641668	592806	715231	94651.2	734277	105795	505702	19839	212780	271755	754130	121777	223976
W0P28_013	132901300	2075941	38710900	5604300	9057420	48848200	11518620	30846170	31693520	/	3540.46	1093521	43874.9	19304.7	71763.2	20855	7252.64	18618.9	46594.7	5426.31	82337.4	12941	38847.6	75638.1	6348.67	49360.8	33333.5	292402	9874.88	12031.8	26082.8	67215.4	16939	25782.6
UBA6099	132877830	1625448	1805288	869572	787724	22980800	5359108	6392800	7929950	/	1057.97	72001.1	18326.7	6635.42	23053	2647.07	3629.06	2624.53	3934.45	23562.2	22335.8	8089.04	16180.2	22367.5	3534.53	11122.3	12592.1	33758.4	176.718	12644.9	12561.5	36078.3	1730.2	9400.98
Acidocella	132693940	22400585	1994590	1645850	2571290	397780490	219518140	9548636	97737480	2045.93	21673.6	757872	404392	71896.5	214925	77086.9	38541.8	57890.2	92889.4	145023	286561	81805.9	110539	89295.8	32419	203655	89477.2	200039	9234.36	121477	107269	358903	65377	105332
Fimivivens	132656500	2203360	5453424	2659591	3584750	50199100	37821652	44142970	92663930	2398.01	5189.59	1124210	92285.6	12663.1	41740	30934.4	108970	13916.3	44575.6	26415.3	44525.6	116637	53502	148217	712.653	45138.7	12024.4	21671	2047.88	41275.7	21804.9	102138	12188.3	69998.1
Anaerolinea	132601200	2819090	1332261	616338	2356190	1287251000	35013480	2300647	341097600	753.398	3261.05	135049	56100.2	20444.8	106899	11211	6706.58	7790.08	8842.53	180733	47180.2	14842.3	28799.5	15535.9	4783.3	123034	32582.6	27750.7	5484.07	28316.8	23516.4	81691.2	10683.8	18533.5
Nigerium	132365000	1904180	2556430	7955110	7725620	432951000	28266000	69436500	24195000	/	14329.3	741838	139554	6336.49	11594.5	4377.09	20453.1	/	/	29666.4	64320.8	134912	110008	28782.1	4161.52	11556.6	3796.21	53996.8	5106.28	11371	15263.6	22248.6	2486.51	50953.8
SAR86A	132346016	10986800	26298573	5408190	4399440	685651100	112458534	59835784	1344604000	6644.06	84386.3	6873750	551376	342450	10225800	6506730	6989850	9695007	10435300	10578500	24369218	4586970	10652000	36454420	108005	1749460	5843010	282505	23049.6	14110100	9192040	6660020	3439720	9163960
UBA11090	131908000	6234950	55404.7	395965	1148510	/	2288730	771744	/	/	856.221	/	982.088	6742.45	22615.2	/	/	/	786.389	8901.52	/	/	7955.49	24648.8	831.025	29213.5	21409.8	48364.6	3761.97	3516.97	5828.41	65734	1263.91	14779.4
Fundicoccus	131821000	650232	1953930	928864	1853360	/	953210	42751000	18789200	/	3341.14	778820	22446.1	8970.62	21456.4	8388.05	29601.4	1690.55	7064.14	106518	27102.5	44730.7	25152.5	37826.2	7094.83	18144.3	3328.29	4128.48	1053.47	10379	12900.4	35855.5	3298.48	6187.65
Propionicicella	131764000	2905810	11060300	4287220	10301400	381212000	27040000	103800000	70025100	/	9041.68	962448	90932	7665.37	10233.1	7249.86	5270.87	2135.83	1901.82	2600.21	2974.88	35100.7	20539.6	105219	5253.46	26581.4	5902.73	15400.3	477.939	11269.4	12283.6	67358.4	4904.82	9752.3
VSOB01	131371414	3901362	14419386	3838300	4791223	553260500	56390684	76583380	232455290	/	13623.9	1199540	332803	17569.2	84881	44294.2	62345.8	12674.8	13498.5	232789	163555	193209	180672	206740	17611.7	112335	17494.4	56588.3	902.093	81838	50336.3	202658	20617.1	85828.8
BAD_6	131240000	4129950	12592400	1927390	3603770	9526580	11940300	54727900	31907500	/	5434.45	687554	30650.2	7693.17	7815.54	12500.6	5345.61	572.52	4820.5	10122.8	7301.26	15031.9	27630.4	43042.1	3801.45	32262.2	2256.29	54887.9	2012.02	15784.8	14130.2	45284.9	3468.53	27367.8
UBA3839	131223150	1840830	4702920	2287710	1552020	50408860	38044932	27605835	82189501	1236.01	10538.3	549500	124204	55368.9	175423	73073.2	51854.8	42187.6	66457.1	177244	202887	86991.2	176777	134316	30244.8	260231	138376	62163.3	6319.33	160312	119583	437530	59638	162436
CAIKUF01	131146052	13638000	1671470	1532470	4120588	7676232500	105560608	3632250	170815920	12831.3	16567.5	291479	174805	122470	125619	9841.4	19904	8153.02	15384.3	119099	65901.1	18058.9	35330.8	61299	154084	158672	147426	417983	45531	55390	38411.2	97203.7	21277.4	29467.1
Pseudospirillum	131093000	10895400	4119610000	7521980	944515	425122000	48669200	2464450000	112946000	7972.04	22397.9	15791700	163229	4036.36	79484	17174.4	9737.06	6090.83	45678.4	10795.2	15200.6	13138.5	15997.8	49330.9	4799.06	90443.4	13256.8	26271.3	3047.12	18254.2	21808.4	78193	21083.7	38273.2
2011_GWC2_44_17	131073700	3148929	16512005	6525327	5650372	808732000	56137720	127218670	87737750	11289.8	81326.8	9603405	1307240	532130	154051	48848.4	104871	1894.79	11422.9	68056.9	205336	168410	174436	228521	23291.1	1104665	81895	377754	15651.3	76554.5	78484.4	220979	42781.4	88721.5
Flemingibacterium	130586300	5699866	9268597	3556536	3881028	352447750	62778050	53520200	321631980	232.332	29562.6	3408680	181167	22861.9	43988.8	47078.2	38783.4	43559.1	7044.09	145863	223140	212800	336291	237053	18909	140537	25975.3	60106.9	2399.87	93929.9	61401.8	274284	17296.2	76632.1
RUG714	130582073	5015313	8025308	2552060	2923289	114932700	62348206	43379857	273945070	/	18881.2	1398100	116140	36439.5	189402	41978.4	47851.3	17921.9	6867.2	305498	193057	181715	244006	158903	26666.1	139423	47424.3	48880.3	1356.45	106044	61976.1	234178	42072.8	69872.8
Kitasatospora	130579967	49843810	16995900	10056400	4706350	5735913800	987928620	100909932	1120993280	16944.9	115351	2303780	3266390	231813	904679	250757	288147	85445	154797	1297190	2055940	1630120	1339480	2392520	170901	1163730	183819	440976	23964.2	511636	442998	1087320	250772	566877
Formivibrio	130336630	15880951	2961250	8201200	37613715	234597800	18472570	7603202	31002000	669.275	4426.11	721544	55444.5	67879.7	8954.84	8341.74	542.642	2536.56	9519.7	63335.3	40466.6	4613.53	18255.3	35245.4	18313.5	52061.3	65473.9	161062	12478.5	20006.4	18995.4	41443.8	5684.16	32582.3
Sideroxydans	130138030	17932931	5718870	8942220	5856570	1337689000	142627020	16113727	252005940	5310.4	24391.1	1121530	404415	177129	577033	196902	73278.7	78184.5	138982	767502	367777	96536.8	200700	261175	89746.7	647068	202618	541814	31368.2	166539	134212	459633	59623.1	244557
MWAR01	129964880	7046442	1787800	1853238	3014520	143098660	18078090	867158	13310370	/	1976.02	115785	147888	14424.7	13013.8	4220.06	11615.8	/	3903.5	32775.9	13932.7	11265.7	29927.6	7909.18	8719.39	115482	129549	540734	13211.6	11547.4	6562.97	70457.4	3498.53	7198.54
Psychroflexus	129853460	6949080	22781589	5217514	3258400	854947200	104726580	81792540	724065060	5088.61	37029.4	5634662	1131270	320233	1423740	647613	589328	799960	426825	1074310	1678280	466058	799483	986962	133213	1550090	663558	250303	26057.5	681436	498252	1015530	170942	570863
UBA1783	129635678	5556832	21676300	7177140	2450330	103101100	38240637	125185040	569639750	859.019	28941.8	2368780	911185	52217.1	156230	50331	31218.2	12333.3	35885.9	387429	203886	281148	354916	295219	26281.1	212846	369015	57027.4	3086.97	160405	168721	312949	51959.7	150007
RUG11130	129389680	3663500	8971274	3455480	1475420	226573800	28808030	12416238	254361870	/	53902.7	1248680	325986	16415.4	78436	139962	66968.8	14522.8	23602	167270	86352.8	179548	94429.1	114021	15878.1	97944.6	28117.7	39590.6	2028.36	51993.1	70058.9	148404	19273.2	55719.8
Allisonella	129353800	870180	4102057	2727990	9526707	12218100	8044690	34036100	125525100	/	4989.5	2463936	49601	14650.6	81915.6	9934.8	10567.3	/	6817.69	77667.9	36028.8	44257	75242.6	46311.2	2903.23	19582.8	5437.8	19924.3	3997.18	27388.2	32960.9	99186.3	15473.5	54338.4
28_57_27	129337696	1209210	5604943	3495182	1304674	31674600	7428360	7438992	22595100	/	3669.97	1476915	22461	11969.2	74834.8	2652.82	7935.15	25350.8	8128.26	73958.8	33648.5	12380.7	15732.1	21510.7	7432.15	40656.8	18341.7	35294	4606.55	21304.1	31788.1	39010.4	10244.9	10168.6
QALR01	129300870	5788830	9618625	3293120	2702470	69387060	55151980	67711170	106978160	3748.92	21381.2	1654740	247299	30948	151426	33794.6	58806.2	21935.8	42650.2	215632	296915	247581	255247	276621	33051.4	173536	50746.3	63295.2	3449.26	120604	94458.8	274456	42257	76684.4
GN02_873	129036864	28290370	12890118	4914289	17312130	168451200	8556610	106676830	82608090	/	12503.8	4690154	754625	270956	23082.6	8078.75	4444.31	22834.4	2663.2	97098.8	11113.4	56997.3	124974	251807	88218.8	166802	96921.2	175847	42727.8	74625.2	61277.4	201667	40485.9	60305.1
Pelosinus	128979690	4371252	9404957	2727381	2480642	55332700	26693597	24691170	255311200	819.638	25778	1374712	356513	16194.7	77266.6	25650.7	20674	13402.3	10816.7	180815	108874	182195	155754	172967	18942.8	80060.5	15706.8	154772	3179.47	59462.8	49721.9	172398	18666.1	59446
Sulfotelmatobacter	128413000	196931870	2200320	1669120	694490	1245107800	11151174000	9564111	154542637	4616.86	47992.6	619568	279186	67646.2	246461	99523	36602.7	42038.2	98986.4	185225	337190	69330.3	143644	121673	51554	257222	105850	234590	23913.1	178879	132147	409853	40422.6	136400
Sebaldella	128332300	818939	4235250	2543040	3248290	50948530	7327400	17625600	110537800	708.865	6131.92	1697965	39583.1	17092.1	101956	29721	11458.1	23838.8	14851.4	86401.2	70948	44632.9	51691.1	31190.4	6661.08	76290.5	22344.5	13861.2	1029.15	55575.4	36090.7	110818	19477.3	46815.8
Elizabethkingia	127887050	3557608	7821795	4213029	8455660	343926880	32669467	44641377	393361230	2859.75	15446	2050140	380988	105302	247488	88347.5	60388	44365.1	67637.6	239903	271181	82664	180142	209727	38555.9	211341	96393.8	131314	16080.6	188222	102744	325251	65923.9	150181
Ornithinimicrobium	127870304	18655000	13296532	6351590	4582419	8726541600	241579080	140062610	296145260	8310.27	28970	1703180	1236090	46725.8	176790	46955.8	51719.4	15737.8	41518.8	355643	272249	205689	229541	305841	52771.8	273636	21099.1	147996	10676.8	106779	96022.6	167847	61791	98221.8
Castellaniella	127641952	12087181	4091830	2816070	4610862	707662830	87242150	7813796	111459535	300571	13588.4	2263940	360232	141309	273416	88182.8	31626.3	24901.7	43258	266199	151752	28048.7	106172	122287	46234.8	701130	93855.6	150848	28151.4	87593.8	61743.8	143633	34587.2	51944
13_2_20CM_66_19	127573200	233764660	3058880	2792739	2610480	4538989050	3539061500	9563017	372587920	10153.8	67762.4	972438	332013	121817	552586	183626	41454.7	43973.4	93539.8	507043	322017	68513.6	137492	211144	103844	274352	203618	649658	54009.9	144057	92180.8	271963	50613.1	119574
Casimicrobium	127520630	8943026	2929430	3047676	8533760	14053146030	81813736	9438069	102205166	15713	10601.3	1316360	289792	1721090	218623	94418	53304.8	55196.5	84527.7	360552	240434	55729.7	107297	224061	587181	234016	122832	440672	216966	94739.6	89364.5	301917	45882.5	120385
UBA9786	127380070	1836655	1541394	1468347	1529897	/	8822800	13528740	26706670	/	3905.44	657721	29875.3	2526.68	3534.44	841.482	/	1453.17	6541.11	/	9747.56	30975.2	32856.4	15830.1	6240.05	15838.5	/	1204.93	303.278	7879.85	8648.91	69481.9	1424.57	9546.1
Halanaerobium	126937720	9543792	63074055	6926959	1946130	55223680	87940074	145908750	1178017400	5359.25	54404.5	6753354	2244190	97816.1	304315	281410	127835	43985.6	160206	558621	259016	505243	594794	603217	61705.4	370937	101053	81275.3	4421.36	172469	154777	484538	81849.3	219466
Tatlockia	126831272	8009838	7701255	6221090	3442800	348984270	197926370	21722700	384833340	7623.68	42419.2	4594450	2649930	677521	464253	190243	111821	167816	154543	373129	423054	161000	378254	395942	96846.5	810512	248910	290234	23378.7	321264	248367	643538	98529.3	302073
Lysinibacillus	126647080	13306400	31717491	8864031	3171220	257441060	136702720	126107767	1142272250	2400.85	56700.4	5592320	1055120	92549.6	381981	144700	219077	73172.1	89375.9	727152	441316	623860	767415	708830	80538.2	543243	164135	217655	6970.74	322769	249203	738017	97730	292783
Avispirillum	126486690	6051150	12841627	4911330	1819540	142010300	43419810	82354859	201611690	5655.23	20399.3	1581920	419281	26769.2	99766.8	55288.4	81950.8	114322	48263.3	331727	249016	447587	327458	222151	13688.2	336402	123536	52127.4	2313.35	241483	145060	376224	40930.6	197478
Caloramator	126436263	3841690	21656151	3346361	2025386	23614000	55411200	47243420	346144800	/	18287.8	2438701	240441	31492.3	72286.4	42395.6	25523.7	14716.6	16375.8	153104	65383.6	139621	240414	113311	13102.9	110379	24060	48507.8	1692.31	68970.5	67319.3	162443	24034.4	84151.6
Ruminococcus_F	126312700	2595664	18158070	1100790	5499192	48743300	8124480	21906350	52073030	/	3619.22	1171310	78621.9	18338.4	25637	7220.41	12137.1	3892.9	5870.87	86987.2	72295.5	45983.2	93720.4	127375	9690.07	60220.9	6097.83	28158.5	483.412	42267	29052	52980.7	12627.2	44036.6
Rathayibacter	126290995	38633848	10260798	9309258	5975520	4069493600	629200300	98096271	719627500	17937	75983.9	968720	2161450	132887	564151	145393	123967	82065.8	116149	745474	509144	449239	444110	1033890	133628	550967	88614.5	370606	27316.8	238851	259242	616900	148871	270811
Paenibacillus_C	126216125	14047343	28984099	7735950	4768540	877592670	243369258	130665382	793185352	68206.7	60212.4	3324930	4657850	97247.4	423422	234520	187669	76380.4	119411	1008620	571080	703928	655867	762316	93893.6	588817	132488	285636	14604.3	287626	236121	826385	107846	334868
XBB2008	126122730	2431229	4278926	1454420	1758620	157607670	24295415	29521250	85093700	279.29	7659	341009	169261	18744.9	47312.8	30351.5	5023.68	8077.09	7892.85	169332	91716.1	41613.4	75240.5	48911.6	6594.97	44039.6	79611.9	38149.1	370.539	57073.2	39870.9	138445	10261.5	43540.4
[truncated: 15,397 more rows]

[truncated: 10 more sheets: S2.10, S2.11, S2.12, S2.13, S2.14, S2.15, S2.16, S2.17, S2.18, S2.19]
